# Supplementary material for: Risk of invasive candidiasis with prolonged duration of ICU stay: a systematic review and meta-analysis
Source: PubMed Central journal article supplement — BMJ Open. 2020 Jul 12;10(7):e036452. doi: 10.1136/bmjopen-2019-036452 (PMC7359383; doi:10.1136/bmjopen-2019-036452), 2020-07-12
Supplement: bmjopen-2019-036452.draft_revisions.pdf [file bmjopen-2019-036452.draft_revisions.pdf]

# BMJ Open

BMJ Open is committed to open peer review. As part of this commitment we make the peer review history of every article we publish publicly available.

When an article is published we post the peer reviewers' comments and the authors' responses online. We also post the versions of the paper that were used during peer review. These are the versions that the peer review comments apply to.

The versions of the paper that follow are the versions that were submitted during the peer review process. They are not the versions of record or the final published versions. They should not be cited or distributed as the published version of this manuscript.

BMJ Open is an open access journal and the full, final, typeset and author-corrected version of record of the manuscript is available on our site with no access controls, subscription charges or pay-per-view fees (<http://bmjopen.bmj.com>).

If you have any questions on BMJ Open's open peer review process please email [info.bmjopen@bmj.com](mailto:info.bmjopen@bmj.com)

# BMJ Open

## The risk of invasive candidiasis with prolonged duration of ICU stay and broad-spectrum antibiotic use: a systematic review and meta-analysis

|                               |                                                                                                               |
|-------------------------------|---------------------------------------------------------------------------------------------------------------|
| Journal:                      | <i>BMJ Open</i>                                                                                               |
| Manuscript ID                 | bmjopen-2019-036452                                                                                           |
| Article Type:                 | Original research                                                                                             |
| Date Submitted by the Author: | 11-Sep-2019                                                                                                   |
| Complete List of Authors:     | Zhang, Zhidan<br>Zhu, Ran<br>Luan, Zhenggang<br>Ma, Xiaochun; the First Hospital of China Medical University, |
| Keywords:                     | ACCIDENT & EMERGENCY MEDICINE, INTENSIVE & CRITICAL CARE, Adult intensive & critical care < ANAESTHETICS      |
|                               |                                                                                                               |

SCHOLARONE™  
Manuscripts

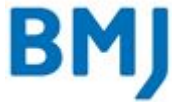

I, the Submitting Author has the right to grant and does grant on behalf of all authors of the Work (as defined in the below author licence), an exclusive licence and/or a non-exclusive licence for contributions from authors who are: i) UK Crown employees; ii) where BMJ has agreed a CC-BY licence shall apply, and/or iii) in accordance with the terms applicable for US Federal Government officers or employees acting as part of their official duties; on a worldwide, perpetual, irrevocable, royalty-free basis to BMJ Publishing Group Ltd ("BMJ") its licensees and where the relevant Journal is co-owned by BMJ to the co-owners of the Journal, to publish the Work in this journal and any other BMJ products and to exploit all rights, as set out in our [licence](#).

The Submitting Author accepts and understands that any supply made under these terms is made by BMJ to the Submitting Author unless you are acting as an employee on behalf of your employer or a postgraduate student of an affiliated institution which is paying any applicable article publishing charge ("APC") for Open Access articles. Where the Submitting Author wishes to make the Work available on an Open Access basis (and intends to pay the relevant APC), the terms of reuse of such Open Access shall be governed by a Creative Commons licence – details of these licences and which [Creative Commons](#) licence will apply to this Work are set out in our licence referred to above.

Other than as permitted in any relevant BMJ Author's Self Archiving Policies, I confirm this Work has not been accepted for publication elsewhere, is not being considered for publication elsewhere and does not duplicate material already published. I confirm all authors consent to publication of this Work and authorise the granting of this licence.

1  
2  
3 **The risk of invasive candidiasis with prolonged duration of ICU stay and broad-**  
4 **spectrum antibiotic use: a systematic review and meta-analysis**  
5  
6  
7  
8  
9  
10

11 **Running title:** Duration of ICU prior to candidemia  
12  
13  
14  
15  
16

17 Zhidan Zhang MD,<sup>a</sup> Ran Zhu MD,<sup>a</sup> Zheng gang Luan MD,<sup>a</sup> Xiao chun Ma MD<sup>a,\*</sup>  
18  
19

20 a Department of Critical Care Medicine, the First Hospital of China Medical  
21 University, Shenyang 110001, Liaoning, China  
22  
23  
24  
25  
26  
27

28 **\*Corresponding author:** Xiao chun Ma  
29  
30

31 Department of Critical Care Medicine, the First Hospital of China Medical University,  
32 Shenyang 110001, Liaoning, China  
33  
34  
35

36 Tel: 008613840192939;  
37  
38

39 E-mail: xiaochun06@yeahmca.cn  
40  
41  
42  
43  
44  
45  
46  
47  
48  
49  
50  
51  
52  
53  
54  
55  
56  
57  
58  
59  
60

## ABSTRACT

**Objective:** This study aimed to evaluate the duration of intensive care unit (ICU) stay prior to onset of invasive candidiasis (IC)/candidemia.

**Design:** Systematic review and meta-analysis.

**Data Sources:** Pubmed, Cochrane, Embase, and Web of Science databases were searched through June, 2019 to identify the relevant studies.

**Eligibility Criteria:** Adult patients who had been admitted to the ICU and developed an invasive candidiasis infection.

**Data extraction and synthesis:** Duplicate data extraction and quality assessment were conducted. Meta-analysis and meta-regression were conducted in Comprehensive Meta-Analysis statistical software.

**Results:** The mean age of patients ranged from 28.2 to 76 years across studies. The pooled mean duration of ICU stay before the onset of candidemia was 12.93 days (95% confidence interval [CI]: 11.70 – 14.15). The pooled mean duration of ICU admission prior to the onset of candidemia ranged from 4 to 47 days. IC patients had a higher proportion of broad-spectrum antibiotic use (89.13%, 95% CI: 82.68 – 93.37%) before the onset of IC, which was higher than that observed in non-IC patients (77.36%, 95% CI: 52.25 – 91.43%). The pooled mean duration of hospital stay was 36.26±5.32 days (95% CI: 25.84 – 46.67) and the pooled mean mortality rate was 49.25±2.16% (95% CI: 45.02 – 53.48%). There was no significant difference in duration of hospital stay or overall mortality between patients with or without *C. albicans*, yet a significant difference was demonstrated in mean length of ICU stay (2.82 days,  $P < 0.001$ ). The meta-regression analysis found that South American

1  
2  
3 countries had significantly longer mean duration of ICU admission prior to  
4  
5 candidemia onset compared with Asian, European, Australian, and North American  
6  
7 countries.  
8  
9

10 **Conclusions:** The current findings demonstrate that a more proactive strategy for the  
11  
12 diagnosis of IC should be considered in these patients, especially relevant for Asian  
13  
14 physicians.  
15  
16

17  
18  
19  
20  
21  
22 **KEYWORDS:** Invasive candidiasis, candidemia, intensive care unit, length of stay,  
23  
24 antibiotic, mortality  
25  
26  
27  
28  
29  
30  
31  
32  
33  
34  
35  
36  
37  
38  
39  
40  
41  
42  
43  
44  
45  
46  
47  
48  
49  
50  
51  
52  
53  
54  
55  
56  
57  
58  
59  
60

### Strengths and limitations of this study

- This was a systematic review to indicate that patients with IC were associated with the use of broad-spectrum antibiotics and the length of ICU stay.
- Meta-regression was used to test differences in regional subgroups, and statistical significance was found.
- Two independent reviewers performed a methodological quality assessment, with a third reviewer consulted for any uncertainties, but this systematic review lacked a pre-specified protocol and its preliminary registration.
- High heterogeneity had existed in some overall and subgroup analyses; in addition to regional differences found in this study, there may be other potential factors that may explain heterogeneity that need to be further explored.
- Due to lack of data, the possible correlation between prolonged exposure to broad-spectrum antibiotics and the time of candidemia onset after ICU admission could not be assessed.

## INTRODUCTION

*Candida* species account for 70% to 90% of invasive fungal infections and are the most frequent cause of fungal infections in patients admitted to the intensive care unit (ICU) [1]. Invasive candidiasis (IC) is associated with a high mortality rate (range: 40% to 60%) [1, 2]. Over recent decades, the incidence of IC has been gradually increasing in most regions [3], ranging from 0.5 to 32 cases per 1,000 ICU admissions. It has been found that there is a significant difference in the incidence of IC among several countries in Latin America and North America; however, data from Asia-Pacific countries are still relatively rare [4]. Candidemia has been described as the most common manifestation of IC, and the further infection of the liver, spleen, heart valves, or eye might also occur after a bloodstream infection [5]. In the past, the main *Candida* species isolated from patients with IC was *C. albicans*. However, non-*C. albicans* species has seen a rising proportion and now account for approximately 50% of all cases of IC in the past two decades [1,6-8].

Diagnosis and management of IC remains challenging for physicians in the ICU [1, 2]. The early initiation of empiric antifungal treatment has been demonstrated to improve the prognosis of invasive candidiasis [2, 9]. However, there is difficulty in the diagnosis of IC which can delay timely antifungal treatment [2, 10]. Blood culture remains the gold standard for the diagnosis of invasive candidiasis, but its sensitivity is variable (21% to 71%) [11].

In order to improve the diagnosis of IC, and to identify the patients who may best benefit from prophylactic, preemptive, or empirical therapy prior to, or at an early stage of ICU admission several methods in predicting the development of IC based on their associated risk factors have been developed [12, 13]. The risk factors in the various predictive models include broad-spectrum antibiotic use, central venous



1  
2  
3 catheter placement, total parenteral nutrition, hemodialysis (days 1–3 in the ICU), any  
4  
5 surgery, immunosuppressive use, pancreatitis prior to ICU admission, and steroid use.  
6  
7 However, different risk factors are included in the different predictive models. In  
8  
9 addition, potential risk factors such as *Candida* colonization [14] and mechanical  
10  
11 ventilation [15] have not been included in these models.  
12  
13

14  
15 Long-term ICU stay has been reported as a risk factor for IC [11, 14-16]. Only a  
16  
17 few studies have examined the interval between ICU admission or initiation of broad-  
18  
19 spectrum antibiotics and the diagnosis of IC. However, the specific duration of long-  
20  
21 term ICU stays and the prolonged use of broad-spectrum antibiotics are often  
22  
23 arbitrarily defined and inconsistent among studies [6, 12, 15, 17-19]. Furthermore, a  
24  
25 large majority of severe candidiasis cases are caused by endogenous colonization.  
26  
27 This may be the primary reason for causing a delay of 7 to 10 days between exposure  
28  
29 to risk factors and the development of IC [20].  
30  
31

32  
33 Thus, the objective of this systematic review was to evaluate the risk factors  
34  
35 associated with the development of candidemia, specifically the length of ICU stay  
36  
37 and the use of broad-spectrum antibiotics.  
38  
39

## 40 41 42 **METHODS**

### 43 44 **Search strategy**

45  
46  
47 The study was performed in accordance with guidance from the Preferred  
48  
49 Reporting Items for Systematic Reviews and Meta-Analyses (PRISMA). PubMed,  
50  
51 Cochrane, Embase, and Web of Science databases were searched through June, 2019  
52  
53 using the following search terms: invasive candidiasis, critical care, critical illness,  
54  
55 candidemia, and antibiotic agents. A detailed search strategy for the Medline database  
56  
57 is shown in Figure 1.  
58  
59  
60

1  
2  
3 Randomized controlled trials (RCTs), cohort studies, case-controlled, and cross-  
4 sectional studies were included. All studies included adult patients who were critically  
5 ill, who had been admitted to the ICU, and who tested positive for *Candida* species  
6 using blood culture analyses. Studies had to have reported quantitative outcomes of  
7 interest and no author was contacted. Letters, comments, editorials, case reports,  
8 proceedings, personal communications, and case series were excluded. Studies in  
9 which patients were diagnosed with candidiasis prior to ICU admission were  
10 excluded. Studies that did not evaluate the incidence of candidiasis as a primary  
11 objective, or that were not designed to evaluate risk factors/prognostic factors of  
12 patients with candidiasis were also excluded.

13  
14  
15  
16  
17  
18  
19  
20  
21  
22  
23  
24  
25  
26  
27  
28  
29  
30  
31  
32  
33  
34  
35  
36  
37  
38  
39  
40  
41  
42  
43  
44  
45  
46  
47  
48  
49  
50  
51  
52  
53  
54  
55  
56  
57  
58  
59  
60  
Patients and/or members of the public were not involved in this study; therefore,  
ethical approval and informed consent were not necessary as meta-analyses do not  
involve human subjects and does not require institutional review board review.

### Study selection and data extraction

Studies identified by the search strategy were reviewed for inclusion and data  
was extracted by two independent reviewers. Where there was uncertainty regarding  
study eligibility, a third reviewer was consulted. The following information / data was  
extracted from studies that met the inclusion criteria: the name of the first author, year  
of publication, country, study design, type of ICU, number of participants in each  
group, participants' age and gender, the presence of *C. Albicans*, the presence of  
neutropenia, and antifungal treatment (especially the use of broad-spectrum  
antibiotics). The following data were also extracted from each article: length of stay in  
hospital/ICU, length of stay prior to ICU admission, duration of ICU stay prior to  
candidemia onset, antibiotic therapy prior to candidemia onset, duration of antibiotic

1  
2  
3 therapy prior to candidemia onset, and overall mortality.  
4  
5  
6  
7

### 8 **Quality assessment**

9  
10 We used the Risk of Bias In Non-randomized Studies of Interventions (ROBINS-  
11 I) tool to assess the quality of the included studies [21]. ROBINS-I is based on the  
12 Cochrane RoB tool and is suited for evaluating non-randomized studies that compare  
13 the health effects of different interventions. ROBINS-I covers 7 different bias  
14 domains: bias due to confounding, bias in selection of participants into the study, bias  
15 in classification of interventions, bias due to deviations from intended interventions,  
16 bias due to missing data, bias in measurement of outcomes, and bias in the selection  
17 of reported results [22-23]. In this systematic review, 2 independent reviewers  
18 performed the quality assessment, with a third reviewer consulted for any  
19 uncertainties.  
20  
21  
22  
23  
24  
25  
26  
27  
28  
29  
30  
31  
32  
33  
34  
35  
36  
37  
38

### 36 **Statistical analysis**

39 Study characteristics were summarized as mean  $\pm$  standard deviations (SD),  
40 mean (range), median (range), or median (IQR) for age or duration of antifungal  
41 treatment; and percentage (%) for sex, rate of *C. Albicans* isolated, neutropenia, and  
42 antifungal treatment used in each study.  
43  
44  
45  
46  
47

48 Clinical outcomes, including hospital stay, ICU length of stay, length of stay  
49 prior to ICU admission, duration of ICU admission prior to candidemia onset, and  
50 duration of antibiotic therapy prior to candidemia onset were represented as mean  
51 (range: [min. – max.]), median (range), or median (IQR [interquartile range: 1<sup>st</sup> – 3<sup>rd</sup>  
52 quartiles]). The rate of antibiotic therapy prior to candidemia onset and overall  
53 mortality rate were presented as a percentage (%), according to the data extracted  
54  
55  
56  
57  
58  
59  
60

1  
2  
3 from the study. All the clinical outcomes were further summarized for overall studies,  
4 or subgroups of studies (with studies' number  $\geq 2$ ) given type of study, presence of  
5 neutropenia, type of ICU, type of *C. Albicans* isolated, presence of IC/candidemia,  
6 and region/country, and meta-regression analyses were further used to investigate  
7 statistical importance of the potential moderators. Before summarizing, studies that  
8 reported quantitative data with median (range) and/or median interquartile range  
9 (IQR) were transformed into mean  $\pm$  SD according to Wan et al. [24]  
10  
11  
12  
13  
14  
15  
16  
17  
18

19 The effect size for the following meta-analysis were set as length of hospital  
20 stay, ICU length of stay, duration of ICU admission prior to candidemia onset, and  
21 overall mortality compared between subgroups, *C. Albicans* and non-*C. Albicans*. The  
22 effect size was calculated as mean difference with 95% CI (Lower, Upper limit) and  
23 significance of *p*-values in length of days or rate ratio with 95%CI and *p*-values in  
24 overall mortality for each given study and then a pooling effect was derived  
25 thereafter. A difference in means of length days  $< 0$  (or rate ratio of overall mortality  
26 rate  $> 1$ ) indicated the pooling effect favored non- *C. Albicans* subgroup; difference in  
27 means of length days  $> 0$  (or rate ratio of overall mortality rate  $< 1$ ) indicated the  
28 pooling effect favored *C. Albicans* subgroup; difference in means of length days = 0  
29 (or rate ratio of overall mortality rate = 1) indicated the pooling effect was similar  
30 between *C. Albicans* and non-*C. Albicans* subgroups. Heterogeneity was evaluated  
31 using a  $\chi^2$ -based Cochran's Q statistic and  $I^2$ , that the random effect model  
32 (DerSimonian-Laird method) and meta-regression analyses with potential moderators  
33 were considered for the meta-analysis if either Q statistic with P values  $< 0.10$  or  
34  $I^2 > 50\%$  were derived; otherwise, a fixed effect model (Mantel-Haenszel method) was  
35 considered for the meta-analysis. For the Q statistic, P values  $< 0.10$  were considered  
36 statistically significant for heterogeneity. For the  $I^2$  statistic, heterogeneity was  
37  
38  
39  
40  
41  
42  
43  
44  
45  
46  
47  
48  
49  
50  
51  
52  
53  
54  
55  
56  
57  
58  
59  
60

1  
2  
3 assessed as follows: no heterogeneity ( $I^2 = 0 - 25\%$ ), moderate heterogeneity ( $I^2 = 25 -$   
4  
5  
6  $50\%$ ), large heterogeneity ( $I^2 = 50 - 75\%$ ), and extreme heterogeneity ( $I^2 = 75 - 100\%$ ).

7  
8 A two-sided P value of  $<0.05$  was considered significant.  
9

10 Countries were classified according to their continent, but since the meta-  
11  
12 analysis of this research topic from China has not yet been seen, in following  
13  
14 discussions, research from China will be selected and specifically examined.  
15

16  
17 The publication bias was assessed by funnel plot with Egger's test and Classical  
18  
19 fail-safe N test for all the enrolled studies (except for subgroups). The absence of  
20  
21 publication bias was indicated by the data points forming a symmetric funnel-shaped  
22  
23 distribution and a 1-tailed significance level of  $P > 0.05$  in Egger's test.[24] All  
24  
25 analyses were performed using Comprehensive Meta-Analysis statistical software,  
26  
27 version 3.3.070 (Biostat, Englewood, NJ, USA).  
28  
29  
30  
31  
32

## 33 **RESULTS**

### 34 **Literature search results**

35  
36  
37 A total of 1875 articles were retrieved by the primary search, and 1800 articles were  
38  
39 excluded after the title and abstract were screened based on the inclusion/exclusion  
40  
41 criteria (Figure 1). Seventy-five articles underwent full-text review, and 34 articles  
42  
43 were excluded due to irrelevant objectives or study designs ( $n=19$ ), reporting  
44  
45 predictor/prognostic factors for mortality ( $n=4$ ), neonatal or pediatric intensive care  
46  
47 unit ( $n=5$ ), not designed for invasive candidiasis ( $n=4$ ), and not reporting outcomes of  
48  
49 interest ( $n=6$ ). Thus, 41 articles were included in the systematic review.  
50  
51  
52  
53  
54  
55  
56  
57

### 58 **Study characteristics**

1  
2  
3 The characteristics of the 41 studies are summarized in Table 1 and Table 2 [14-16,  
4 25, 27-29, 31-50]. A total of 10,692 patients were included across the studies, with the  
5 number of patients in each study ranging from 12 to 1,400. The mean age of the  
6 patients ranged from 28.2 to 76 years. The majority of the patients were males (range:  
7 40% to 75.9%). These studies were conducted in different countries: 19 in Europe, 14  
8 in Asia, 1 in the US, 4 in South America, 2 in Australia and 1 multinational study  
9 (Australia, Belgium, Greece, Brazil).  
10  
11  
12  
13  
14  
15  
16  
17  
18  
19  
20  
21  
22  
23  
24  
25  
26  
27  
28  
29  
30  
31  
32  
33  
34  
35  
36  
37  
38  
39  
40  
41  
42  
43  
44  
45  
46  
47  
48  
49  
50  
51  
52  
53  
54  
55  
56  
57  
58  
59  
60

1  
2  
3  
4  
5  
6  
7  
8  
9  
10  
11  
12  
13  
14  
15  
16  
17  
18  
19  
20  
21  
22  
23  
24  
25  
26  
27  
28  
29  
30  
31  
32  
33  
34  
35  
36  
37  
38  
39  
40  
41  
42  
43  
44  
45  
46

**Table 1. Characteristics of studies included in this systematic review**

| Studies<br>1 <sup>st</sup> Author<br>(year) | Country | Study<br>design                            | Type of ICU | Total<br>number of<br>patients | IC and<br>Candidemia | No. of<br>patients | Age<br>(years)           | Male<br>(%) | <i>C.Albica</i><br>isolated<br>(%) | Neutropen<br>ia (%) | Antifungal treatment        |                                                                                                                                                                  |
|---------------------------------------------|---------|--------------------------------------------|-------------|--------------------------------|----------------------|--------------------|--------------------------|-------------|------------------------------------|---------------------|-----------------------------|------------------------------------------------------------------------------------------------------------------------------------------------------------------|
|                                             |         |                                            |             |                                |                      |                    |                          |             |                                    |                     | Duration<br>of<br>treatment | Antifungal treatment used                                                                                                                                        |
| Zhao H (2018)                               | China   | retrospective cohort                       | ICU         |                                | Candidemia           | 95                 | 69.3±16.5                | 57.90%      | 59                                 | —                   | —                           | 17.90%                                                                                                                                                           |
| Ding R (2018)                               | China   | retrospective cohort                       | ICU         | 72                             | Candidemia           | 72                 | 62.5<br>(49.8,<br>77.0)§ | 62.50%      | 15                                 | —                   | —                           | Fluconazole 30.6%<br>Voriconazole 9.70%<br>Echinocandin 44.4%                                                                                                    |
| Yang et al.<br>(2017) <sup>[25]</sup>       | China   | Retrospective cohort study<br>(China-SCAN) | ICU         | 306                            | Early-onset IC       | 105                | 56.9<br>(19.94)§         | 64.80%      | 47.7                               | 1.90%               | —                           | Fluconazole (39.3%)<br>Caspofungin(21.3%)<br>Voriconazole (19.1%)<br>Micafungin(10.1%)<br>Itraconazole(5.6%)<br>Amphotericin B (3.4%)<br>Combined therapy (1.1%) |
|                                             |         |                                            |             |                                |                      | 201                | 64.0<br>(19.67)§         | 70.60%      | 36.1                               | 1.50%               | —                           | Fluconazole (36.9%)<br>Caspofungin(25.1%)<br>Voriconazole (17.9%)<br>Micafungin(7.8%)<br>Itraconazole(9.5%)<br>Amphotericin B (1.7%)<br>Combined therapy (1.1%)  |

|    |                  |         |              |                 |        |                |     |           |       |       |        |                |                           |
|----|------------------|---------|--------------|-----------------|--------|----------------|-----|-----------|-------|-------|--------|----------------|---------------------------|
| 1  |                  |         |              |                 |        |                |     |           |       |       |        |                |                           |
| 2  |                  |         |              |                 |        |                |     |           |       |       |        |                |                           |
| 3  |                  |         |              |                 |        |                |     |           |       |       |        |                |                           |
| 4  |                  |         |              |                 |        |                |     |           |       |       |        |                |                           |
| 5  | Tukenmez         | Turkey  | Case-        | ICU             | 73     | Candidemia     | 36  | 65 (52-   | 52.80 | 75    | 17.6 ± | Caspofungin    |                           |
| 6  | Tigen E (2017)   |         | control      |                 |        |                |     | 73)†      | %     |       | 11.7   | Posaconazole   |                           |
| 7  |                  |         | study        |                 |        |                |     |           |       |       | days   | Voriconazole   |                           |
| 8  |                  |         |              |                 |        |                |     |           |       |       |        | Itraconazole   |                           |
| 9  |                  |         |              |                 |        |                |     |           |       |       |        | Fluconazole    |                           |
| 10 |                  |         |              |                 |        |                |     |           |       |       |        | Amphotericin B |                           |
| 11 |                  |         |              |                 |        |                |     |           |       |       |        |                |                           |
| 12 |                  |         |              |                 |        |                |     |           |       |       |        |                |                           |
| 13 |                  |         |              |                 |        |                |     |           |       |       |        |                |                           |
| 14 |                  |         |              |                 |        |                |     |           |       |       |        |                |                           |
| 15 | Baldesi O        | France  | Case-        | ICU             | 246,45 | Candidemia     | 851 | 65 [54;   | 62.60 | 61.40 | 5.10%  | —              | —                         |
| 16 | (2017)           |         | control      |                 |        |                |     | 75]§      | %     |       |        |                |                           |
| 17 |                  |         | study        |                 |        |                |     |           |       |       |        |                |                           |
| 18 |                  |         |              |                 |        |                |     |           |       |       |        |                |                           |
| 19 |                  |         |              |                 |        |                |     |           |       |       |        |                |                           |
| 20 |                  |         |              |                 |        |                |     |           |       |       |        |                |                           |
| 21 |                  |         |              |                 |        |                |     |           |       |       |        |                |                           |
| 22 | Rudramurthy      | India   | prospective  | MICU, SICU      | 1161   | Candidemia (C. | 74  | 39 (16 -  | 62.20 | —     | —      | —              | fluconazole (20.3)        |
| 23 | SM (2017)        |         | cohort       |                 |        | auris)         |     | 58.5)§    | %     |       |        |                | echinocandin(9.5)         |
| 24 |                  |         |              |                 |        |                |     |           |       |       |        |                |                           |
| 25 |                  |         |              |                 |        |                |     |           |       |       |        |                |                           |
| 26 |                  |         |              |                 |        |                |     |           |       |       |        |                |                           |
| 27 |                  |         |              |                 |        |                |     |           |       |       |        |                |                           |
| 28 |                  |         |              |                 |        |                |     |           |       |       |        |                |                           |
| 29 | Kawano Y         | Japan   | retrospectiv | ICU             | 4,136  | Candidemia     | 25  | 69 (24 -  | 56.00 | 52    | 0      | —              | antifungal treatment: 32% |
| 30 | (2017)           |         | e cohort     |                 |        |                |     | 88)†      | %     |       |        |                |                           |
| 31 |                  |         |              |                 |        |                |     |           |       |       |        |                |                           |
| 32 | OrtizRuiz et al. | Colombi | Case-        | Polyvalent,     | 243    | Candidemia     | 81  | 64.5 (51- | 51.85 | 42    | —      | —              | —                         |
| 33 | (2016) [16]      | a       | control      | cardiovascularI |        |                |     | 78) §     | %     |       |        |                |                           |
| 34 |                  |         | study        | CU              |        |                |     |           |       |       |        |                |                           |
| 35 |                  |         |              |                 |        |                |     |           |       |       |        |                |                           |
| 36 |                  |         |              |                 |        |                |     |           |       |       |        |                |                           |
| 37 |                  |         |              |                 |        |                |     |           |       |       |        |                |                           |
| 38 |                  |         |              |                 |        |                |     |           |       |       |        |                |                           |
| 39 |                  |         |              |                 |        |                |     |           |       |       |        |                |                           |
| 40 |                  |         |              |                 |        |                |     |           |       |       |        |                |                           |
| 41 |                  |         |              |                 |        |                |     |           |       |       |        |                |                           |
| 42 |                  |         |              |                 |        |                |     |           |       |       |        |                |                           |
| 43 |                  |         |              |                 |        |                |     |           |       |       |        |                |                           |
| 44 |                  |         |              |                 |        |                |     |           |       |       |        |                |                           |
| 45 |                  |         |              |                 |        |                |     |           |       |       |        |                |                           |
| 46 |                  |         |              |                 |        |                |     |           |       |       |        |                |                           |



|    |                 |           |                              |                |       |                                                      |      |                  |       |      |       |               |                       |
|----|-----------------|-----------|------------------------------|----------------|-------|------------------------------------------------------|------|------------------|-------|------|-------|---------------|-----------------------|
| 1  |                 |           |                              |                |       |                                                      |      |                  |       |      |       |               |                       |
| 2  |                 |           |                              |                |       |                                                      |      |                  |       |      |       |               |                       |
| 3  |                 |           |                              |                |       |                                                      |      |                  |       |      |       |               |                       |
| 4  |                 |           |                              |                |       |                                                      |      |                  |       |      |       |               |                       |
| 5  | Gong et al.     | China     | Prospective, MICU, SICU, 306 | Integrated ICU | 306   | Candidemia                                           | 98   | 62.2±17.2        | 62.20 | 100  | 3.10% | 12.85         | Triazole (64.7%)      |
| 6  | (2016) [47]     |           | cohort                       |                |       | ( <i>C. albicans</i> )                               |      | 6                | %     |      |       | days          | Echinocandin (31.8%)  |
| 7  |                 |           | study                        |                |       |                                                      |      |                  |       |      |       |               | Polyenes (0%)         |
| 8  |                 |           | (China-SCAN)                 |                |       |                                                      |      |                  |       |      |       |               |                       |
| 9  |                 |           |                              |                |       |                                                      |      |                  |       |      |       |               |                       |
| 10 |                 |           |                              |                |       |                                                      |      |                  |       |      |       |               |                       |
| 11 |                 |           |                              |                |       | Candidemia                                           | 146  | 61.4±21.3        | 72.60 | —    | 1.40% | 20.4          | Triazole (62.8%)      |
| 12 |                 |           |                              |                |       | (Non- <i>Candida albicans</i> )                      |      | 6                | %     |      |       | days          | Echinocandin (34.1%)  |
| 13 |                 |           |                              |                |       |                                                      |      |                  |       |      |       |               | Polyenes (2.3%)       |
| 14 |                 |           |                              |                |       |                                                      |      |                  |       |      |       |               |                       |
| 15 | Playford EG     | Australia | prospective cohort           | MICU, SICU     | 6,714 | ICU-acquired IC                                      | 96   | —                | —     | 66   | —     | —             | —                     |
| 16 | (2016)          |           |                              |                |       | Control (no IC)                                      | 6618 | —                | —     | —    | —     | —             | —                     |
| 17 |                 |           |                              |                |       |                                                      |      |                  |       |      |       |               |                       |
| 18 |                 |           |                              |                |       |                                                      |      |                  |       |      |       |               |                       |
| 19 |                 |           |                              |                |       |                                                      |      |                  |       |      |       |               |                       |
| 20 | Pinhati HM      | Brazil    | cross-sectional              | ICU            | 40    | fluconazole-resistant <i>C. parapsilosis</i> (FRCP)  | 21   | 70 (23–91)†      | 66.70 | —    | —     | —             | any: (33.3)           |
| 21 | (2016)          |           |                              |                |       |                                                      |      |                  |       |      |       |               | fluconazole: (19.0)   |
| 22 |                 |           |                              |                |       |                                                      |      |                  |       |      |       |               |                       |
| 23 |                 |           |                              |                |       |                                                      |      |                  |       |      |       |               |                       |
| 24 |                 |           |                              |                |       |                                                      |      |                  |       |      |       |               |                       |
| 25 |                 |           |                              |                |       | fluconazole-susceptible <i>Candida</i> species (FSC) | 19   | 76 (35–90)†      | 57.90 | —    | —     | —             | any: (15.8)           |
| 26 |                 |           |                              |                |       |                                                      |      |                  |       |      |       |               | fluconazole: (15.8)   |
| 27 |                 |           |                              |                |       |                                                      |      |                  |       |      |       |               |                       |
| 28 |                 |           |                              |                |       |                                                      |      |                  |       |      |       |               |                       |
| 29 |                 |           |                              |                |       |                                                      |      |                  |       |      |       |               |                       |
| 30 | Aguilar et al.  | Spain     | Prospective cohort study     | SICU           | 22    | IC                                                   | 22   | 66 (53.7–74.2) § | 72.70 | 59.1 | —     | 10 (5.0–16.5) | Echinocandins (86.4%) |
| 31 | (2015) [15]     |           |                              |                |       |                                                      |      |                  |       |      |       | days          | Fluconazole (13.6%)   |
| 32 |                 |           |                              |                |       |                                                      |      |                  |       |      |       |               |                       |
| 33 |                 |           |                              |                |       |                                                      |      |                  |       |      |       |               |                       |
| 34 | Fochtman et al. | Austria   | Retrospective cohort study   | Burn ICU       | 174   | Candidemia                                           | 20   | 39 (17–88) †     | 60%   | 60   | —     | —             | Triazoles (70%)       |
| 35 | (2015) [27]     |           |                              |                |       |                                                      |      |                  |       |      |       |               |                       |
| 36 |                 |           |                              |                |       | Control                                              | 154  | 58 (17–94) †     | 61%   | —    | —     | —             | Echinocandins (30%)   |
| 37 |                 |           |                              |                |       |                                                      |      |                  |       |      |       |               |                       |
| 38 |                 |           |                              |                |       |                                                      |      |                  |       |      |       |               |                       |
| 39 |                 |           |                              |                |       |                                                      |      |                  |       |      |       |               |                       |
| 40 |                 |           |                              |                |       |                                                      |      |                  |       |      |       |               |                       |
| 41 |                 |           |                              |                |       |                                                      |      |                  |       |      |       |               |                       |
| 42 |                 |           |                              |                |       |                                                      |      |                  |       |      |       |               |                       |
| 43 |                 |           |                              |                |       |                                                      |      |                  |       |      |       |               |                       |
| 44 |                 |           |                              |                |       |                                                      |      |                  |       |      |       |               |                       |
| 45 |                 |           |                              |                |       |                                                      |      |                  |       |      |       |               |                       |
| 46 |                 |           |                              |                |       |                                                      |      |                  |       |      |       |               |                       |

|    |                                |                        |                                       |                     |           |                                 |      |                     |        |      |       |              |                                                                                               |
|----|--------------------------------|------------------------|---------------------------------------|---------------------|-----------|---------------------------------|------|---------------------|--------|------|-------|--------------|-----------------------------------------------------------------------------------------------|
| 1  |                                |                        |                                       |                     |           |                                 |      |                     |        |      |       |              |                                                                                               |
| 2  |                                |                        |                                       |                     |           |                                 |      |                     |        |      |       |              |                                                                                               |
| 3  |                                |                        |                                       |                     |           |                                 |      |                     |        |      |       |              |                                                                                               |
| 4  |                                |                        |                                       |                     |           |                                 |      |                     |        |      |       |              |                                                                                               |
| 5  | Klingsporet al.(2015) [28]     | 14 countries in Europe | Prospective cohort study              | SICU                | 807       | IC                              | 779  | 63(0–91)†           | 62.50% | 54   | —     | —            | Fluconazole (60%)<br>Caspofungin (18.7%)<br>Amphotericin B (13%)<br>Voriconazole (4.8%)       |
| 6  |                                |                        |                                       |                     |           |                                 |      |                     |        |      |       |              |                                                                                               |
| 7  |                                |                        |                                       |                     |           |                                 |      |                     |        |      |       |              |                                                                                               |
| 8  |                                |                        |                                       |                     |           |                                 |      |                     |        |      |       |              |                                                                                               |
| 9  |                                |                        |                                       |                     |           |                                 |      |                     |        |      |       |              |                                                                                               |
| 10 | Chakrabarti et al. (2015) [29] | India                  | Prospective cohort study              | MICU, SICU          | 1400      | Candidemia                      | 1400 | 49.7 ± 17.7         | —      | 20.9 | 1.30% | 9.0 (5-15)§  | Azoles (72.0%)<br>Echinocandins (18.3%)<br>Amphotericin B (14.4%)                             |
| 11 |                                |                        |                                       |                     |           |                                 |      |                     |        |      |       |              |                                                                                               |
| 12 |                                |                        |                                       |                     |           |                                 |      |                     |        |      |       |              |                                                                                               |
| 13 |                                |                        |                                       |                     |           |                                 |      |                     |        |      |       |              |                                                                                               |
| 14 | Liao et al. (2015) [14]        | China                  | Prospective cohort study (China-SCAN) | MICU, SICU, Mix ICU | 306       | Flu-S                           | 129  | 62.4±19.5           | 68.20% | 60.5 | 3.10% | —            | Monoantifungaltherapy (64.5%)<br>Fungal drug adjustment (35.7%)<br>Completely improved(34.6%) |
| 15 |                                |                        |                                       |                     |           |                                 |      |                     |        |      |       |              |                                                                                               |
| 16 |                                |                        |                                       |                     |           |                                 |      |                     |        |      |       |              |                                                                                               |
| 17 |                                |                        |                                       |                     |           |                                 |      |                     |        |      |       |              |                                                                                               |
| 18 |                                |                        |                                       |                     |           |                                 |      |                     |        |      |       |              |                                                                                               |
| 19 |                                |                        |                                       |                     |           |                                 |      |                     |        |      |       |              |                                                                                               |
| 20 |                                |                        |                                       |                     |           |                                 |      |                     |        |      |       |              |                                                                                               |
| 21 |                                |                        |                                       |                     |           |                                 |      |                     |        |      |       |              |                                                                                               |
| 22 |                                |                        |                                       |                     |           |                                 |      |                     |        |      |       |              |                                                                                               |
| 23 |                                |                        |                                       |                     |           |                                 |      |                     |        |      |       |              |                                                                                               |
| 24 |                                |                        |                                       |                     |           |                                 |      |                     |        |      |       |              |                                                                                               |
| 25 |                                |                        |                                       |                     |           |                                 |      |                     |        |      |       |              |                                                                                               |
| 26 | Kautzky S (2015)               | Austria                | prospective cohort                    | MICU                | 65        | IC (invasive candida infection) | 5    | 28.2 ± 9.7          | 20%    | —    | 0%    | 15.40 ± 13.9 | 100%                                                                                          |
| 27 |                                |                        |                                       |                     |           |                                 |      |                     |        |      |       |              |                                                                                               |
| 28 |                                |                        |                                       |                     |           |                                 |      |                     |        |      |       |              |                                                                                               |
| 29 |                                |                        |                                       |                     |           |                                 |      |                     |        |      |       |              |                                                                                               |
| 30 |                                |                        |                                       |                     |           |                                 |      |                     |        |      |       |              |                                                                                               |
| 31 |                                |                        |                                       |                     |           |                                 |      |                     |        |      |       |              |                                                                                               |
| 32 |                                |                        |                                       |                     |           |                                 |      |                     |        |      |       |              |                                                                                               |
| 33 |                                |                        |                                       |                     |           |                                 |      |                     |        |      |       |              |                                                                                               |
| 34 |                                |                        |                                       |                     |           |                                 |      |                     |        |      |       |              |                                                                                               |
| 35 | Karacaer et al. (2014) [31]    | Turkey                 | Prospective cohort study              | ICU service         | burn 2362 | IC                              | 63   | 70.2 ± 19.5 (14-95) | 54%    | 64   | —     | —            | —                                                                                             |
| 36 |                                |                        |                                       |                     |           |                                 |      |                     |        |      |       |              |                                                                                               |
| 37 |                                |                        |                                       |                     |           |                                 |      |                     |        |      |       |              |                                                                                               |
| 38 |                                |                        |                                       |                     |           |                                 |      |                     |        |      |       |              |                                                                                               |
| 39 |                                |                        |                                       |                     |           |                                 |      |                     |        |      |       |              |                                                                                               |
| 40 |                                |                        |                                       |                     |           |                                 |      |                     |        |      |       |              |                                                                                               |
| 41 |                                |                        |                                       |                     |           |                                 |      |                     |        |      |       |              |                                                                                               |
| 42 |                                |                        |                                       |                     |           |                                 |      |                     |        |      |       |              |                                                                                               |
| 43 |                                |                        |                                       |                     |           |                                 |      |                     |        |      |       |              |                                                                                               |
| 44 |                                |                        |                                       |                     |           |                                 |      |                     |        |      |       |              |                                                                                               |
| 45 |                                |                        |                                       |                     |           |                                 |      |                     |        |      |       |              |                                                                                               |
| 46 |                                |                        |                                       |                     |           |                                 |      |                     |        |      |       |              |                                                                                               |

1  
2  
3  
4  
5  
6  
7  
8  
9  
10  
11  
12  
13  
14  
15  
16  
17  
18  
19  
20  
21  
22  
23  
24  
25  
26  
27  
28  
29  
30  
31  
32  
33  
34  
35  
36  
37  
38  
39  
40  
41  
42  
43  
44  
45  
46

|                                       |        |                                       |     |       |                             |      |              |         |       |       |                  |                                                                                                                                                                    |
|---------------------------------------|--------|---------------------------------------|-----|-------|-----------------------------|------|--------------|---------|-------|-------|------------------|--------------------------------------------------------------------------------------------------------------------------------------------------------------------|
| Colombo et al. (2014) <sup>[32]</sup> | Brazil | Retrospective cohort study            | ICU | 1,392 | Candidemia                  | 647  | 66 (18–97) † | 50.7    | 44    | 2.50% | —                | Amphotericin B (period 1:27.8%; period 2: 13.4%)<br>Echinocandins(period 1: 5.9%; period 2: 18.0%)                                                                 |
| Hu et al.(2014) <sup>[48]</sup>       | China  | Prospective cohort study (China-SCAN) | ICU | 294   | CRCBSI                      | 29   | 69.4 ± 19.1  | 75.90 % | 28.6  | —     | 19.0 ± 13.3 days | Fluconazole (39.3%)<br>Caspofungin(25.0%)<br>Voriconazole(14.3%)<br>Micafungin (10.70%)<br>Itraconazole(10.7%)<br>Amphotericin B (0%)<br>Two-drug combination (0%) |
|                                       |        |                                       |     |       | Non-CRCBSI                  | 265  | 60.7±20.2 %  | 68.30   | 40.3  | —     | 16.7 ± 13.3 days | Fluconazole (36.7%)<br>Caspofungin(23.6%)<br>Voriconazole(19.2%)<br>Micafungin (8.7%)<br>Itraconazole(7.9%)<br>Amphotericin B(2.2%)<br>Two-drugs combination(1.7%) |
| Lortholary O (2014)                   | France | prospective cohort                    | ICU | 2507  | ICU-acquired candidemia     | 1206 | 60 ± 17      | 62.00 % | 57.10 | —     | —                | Fluconazole(55.4 %)<br>Echinocandins(26.2 %)<br>Others (including combination)(12.6 %)                                                                             |
|                                       |        |                                       |     |       | non-ICU acquired candidemia | 1301 | 60 ± 17      | 58.70 % | 54.90 | —     | —                | Fluconazole(59.9 %)<br>Echinocandins(19.1 %)<br>Others (including combination)(13.3 %)                                                                             |
| Yapar N (2014)                        | Turkey | retrospective cohort                  | ICU | 1076  | Candidemia                  | 66   | 54.4 ± 23.9  | 53%     | 53    | —     | —                | 9%                                                                                                                                                                 |

|                                            |         |                                       |                                            |       |                             |                          |                   |             |      |       |                  |                                                                                    |       |
|--------------------------------------------|---------|---------------------------------------|--------------------------------------------|-------|-----------------------------|--------------------------|-------------------|-------------|------|-------|------------------|------------------------------------------------------------------------------------|-------|
|                                            |         |                                       |                                            |       |                             | Control (non-Candidemia) | 1010              | 53.2 ± 23.0 | 63%  | —     | —                | —                                                                                  | 6.30% |
| Guo et al.(2013) <sup>[49]</sup>           | China   | Prospective cohort study (China-SCAN) | MICU SICU General Emergency Neurologic ICU | 306   | Candidemia                  | 306                      | 61.5±20.0         | 68.60%      | 40.2 | 1.60% | 14 (0-104)† days | Fluconazole (37.7%)<br>Caspofungin (23.9%)<br>Voriconazole (18.3%)                 |       |
| Giri S (2013)                              | India   | prospective cohort                    | ICU                                        | 5,976 | Candidemia                  | 39                       | 35.14 (3days-79y) | 61.50%      | 4    |       |                  |                                                                                    |       |
| Tortorano et al.(2012) <sup>[33]</sup>     | Italy   | Prospective cohort study              | MICU, SICU                                 | 384   | Candidemia                  | 276                      | —                 | —           | 60.9 | —     | —                | Fluconazole (63%)<br>Amphotericin B (22%)<br>Caspofungin (7%)<br>Voriconazole (6%) |       |
| Ylipalosaari et al. (2012) <sup>[34]</sup> | Finland | Retrospective cohort study            | MICU,SICU                                  | 82    | ICU-acquired candidemia     | 38                       | 63 (45-69) §      | 71%         | 76.3 | —     | Median: 22 days  | Fluconazole (73%)<br>Amphotericin B (34%)<br>Echinocandins (31%)                   |       |
|                                            |         |                                       |                                            |       | non-ICU-acquired candidemia | 44                       | 64 (56-75) §      | 61%         | 68.9 | —     | Median: 24 days  | Fluconazole (77%)<br>Amphotericin B (35%)<br>Echinocandins (40%)                   |       |
| Pasero D et al. (2011) <sup>[35]</sup>     | Italy   | Prospective cohort study              | SICU                                       | 349   | Candidemia                  | 26                       | 60±21             | 61.50%      | 73   | —     | —                | —                                                                                  |       |

|  |                                |                                    |                            |                        |     |                                               |     |           |            |      |     |                 |                                                                    |
|--|--------------------------------|------------------------------------|----------------------------|------------------------|-----|-----------------------------------------------|-----|-----------|------------|------|-----|-----------------|--------------------------------------------------------------------|
|  |                                |                                    |                            |                        |     | Control                                       | 323 | 67±16     | 65.30<br>% | —    | —   | —               |                                                                    |
|  | Han SS et al. (2010) [36]      | Korea                              | Case-control study         | MICU                   | 52  | Candidemia                                    | 49  | 57.6±14.1 | —          | 65   | 25% | 11 (1-45)† days | Amphotericin B (71.4%)<br>Fluconazole (28.6%)                      |
|  |                                |                                    |                            |                        |     | Control                                       | 147 | 57.4±14.0 | —          | —    | 8%  |                 |                                                                    |
|  | Pratikaki M et al. (2009) [37] | Greece                             | Case-control study         | Multi-disciplinary ICU | 855 | Candidemia                                    | 33  | 57±18     | 64%        | 33.3 | 0%  |                 | Amphotericin B (57.1%)                                             |
|  |                                |                                    |                            |                        |     | Control                                       | 132 | 58±18     | 70%        | —    | 0%  | >14 days        | Voriconazole(17.9%),<br>Caspofungin (14.3%)<br>Fluconazole (10.7%) |
|  | Playford et al.(2009) [38]     | Australia                          | Prospective cohort study   | MICU, SICU             | 615 | IC                                            | 15  | NA        | NA         | 73.3 | 0%  | —               | —                                                                  |
|  | Holleyetal.(2009) [39]         | Australia, Belgium, Greece, Brazil | Retrospective cohort study | Multi-disciplinary ICU | 189 | Candidemia<br>( <i>C. albicans</i> )          | 104 | 56.5±17.1 | 63.50<br>% | 100  | —   | 1(1-32)†days    | Fluconazole (37%)<br>Amphotericin B (31%)                          |
|  |                                |                                    |                            |                        |     | Candidemia<br>(Non- <i>Candida albicans</i> ) | 85  | 58.9±16.3 | 44.70<br>% | —    | —   |                 | Fluconazole and amphotericin B (15%)                               |
|  | Choi et al. (2009) [40]        | Korea                              | Retrospective cohort study | ICU                    | 497 | Candidemia<br>( <i>C. albicans</i> )          | 54  | 49±23     | 44.40<br>% | 100  | 13% | —               | Amphotericin B (77.8%)<br>Fluconazole (16.7%)                      |
|  |                                |                                    |                            |                        |     | Candidemia                                    | 27  | 48±25     | 44.40<br>% | —    | 19% | —               | Fluconazole and amphotericin B (5.6%)                              |

| Author (Year)               | Country         | Study Design               | Setting                  | n   | Infection                                                  | n   | APACHE II    | Mortality % | Survival % | LOS (days) | Cost (€)       | Treatment                                                                                                             |                                                                                             |
|-----------------------------|-----------------|----------------------------|--------------------------|-----|------------------------------------------------------------|-----|--------------|-------------|------------|------------|----------------|-----------------------------------------------------------------------------------------------------------------------|---------------------------------------------------------------------------------------------|
| Yap et al (2009) [50]       | China Hong Kong | Retrospective cohort study | MICU SICU                | 128 | Candidemia<br>( <i>C. glabrata</i> ,<br><i>C. krusei</i> ) | 128 | 54 (43-68) § | 63.30 %     | 56         | 11%        | —              | Amphotericin B (39.1%)<br>Fluconazole (38%)<br>Amphotericin B+fluconazole (13%)<br>Caspofungin or voriconazole (9.8%) |                                                                                             |
| Chow et al. (2008) [41]     | US              | Case-control study         | MICU, SICU               | 926 | Candidemia<br>(Non- <i>Candida albicans</i> )              | 67  | 62.3±14.5    | 57%         | —          | —          | —              | —                                                                                                                     | Fluconazole (84.8%)<br>Amphotericin B (23.9%)<br>Caspofungin (10.9%)<br>Voriconazole (4.3%) |
|                             |                 |                            |                          |     | Candidemia<br>( <i>C. albicans</i> )                       | 79  | 57±17.0      | 60%         | 100        | —          | —              | —                                                                                                                     | Fluconazole (63%)<br>Amphotericin B (33.3%)<br>Caspofungin (11.1%)<br>Voriconazole (0%)     |
|                             |                 |                            |                          |     | Control                                                    | 780 | 62.3±17.4    | 56%         | —          | —          | —              | —                                                                                                                     | Fluconazole (100%)<br>Amphotericin B (14.3%)<br>Caspofungin (0%)<br>Voriconazole (0%)       |
| Bougnoux et al. (2008) [42] | France          | Prospective cohort study   | MICU<br>SICU<br>HU<br>BU | 290 | Candidemia                                                 | 57  | 56.1±18.2    | 67%         | 54.2       | 19.30%     | 13.2±10.3 days | Fluconazole (78.3%)<br>Amphotericin B (52.2%)<br>Flucytosine (15.2%)                                                  |                                                                                             |

|    |                 |        |                        |      |                      |      |          |       |       |            |           |                              |
|----|-----------------|--------|------------------------|------|----------------------|------|----------|-------|-------|------------|-----------|------------------------------|
| 1  |                 |        |                        |      |                      |      |          |       |       |            |           |                              |
| 2  |                 |        |                        |      |                      |      |          |       |       |            |           |                              |
| 3  |                 |        |                        |      |                      |      |          |       |       |            |           |                              |
| 4  |                 |        |                        |      |                      |      |          |       |       |            |           |                              |
| 5  | Girãoet         | Brazil | Prospective ICU        | 73   | Candidemia           | 40   | 51(12-   | 60%   | —     | —          | —         | —                            |
| 6  | al.(2008) [43]  |        | cohort study           |      | (Non- <i>Candida</i> |      | 86)*     |       |       |            |           |                              |
| 7  |                 |        |                        |      | <i>albicans</i> )    |      |          |       |       |            |           |                              |
| 8  |                 |        |                        |      | Candidemia (C.       | 33   | 51(15-   | 40%   | 100   | —          | —         | —                            |
| 9  |                 |        |                        |      | <i>albicans</i> )    |      | 86)*     |       |       |            |           |                              |
| 10 |                 |        |                        |      |                      |      |          |       |       |            |           |                              |
| 11 | Dimopoulos et   | Greece | Prospective MICU, SICU | 56   | Candidemia (C.       | 36   | 60.5 ±   | 44.40 | 100   | 0%         | Respon    | Fluconazole as prophylaxis:  |
| 12 | al. (2008) [44] |        | cohort study           |      | <i>albicans</i> )    |      | 14.9     | %     |       | (excluded) | e rate:   | Amphotericin B (75%)         |
| 13 |                 |        |                        |      |                      |      |          |       |       |            | (80.6%)   | Caspofungin (25%)            |
| 14 |                 |        |                        |      |                      |      |          |       |       |            |           |                              |
| 15 |                 |        |                        |      |                      |      |          |       |       |            |           |                              |
| 16 |                 |        |                        |      |                      |      |          |       |       |            |           | No fluconazole as            |
| 17 |                 |        |                        |      |                      |      |          |       |       |            |           | prophylaxis:                 |
| 18 |                 |        |                        |      |                      |      |          |       |       |            |           | Amphotericin B (60%)         |
| 19 |                 |        |                        |      |                      |      |          |       |       |            |           | Caspofungin (40%)            |
| 20 |                 |        |                        |      | Candidemia           | 20   | 64.5±    | 55%   | —     |            | Respon    | Amphotericin B (100%)        |
| 21 |                 |        |                        |      | (Non- <i>Candida</i> |      | 16.8     |       |       |            | e rate:   |                              |
| 22 |                 |        |                        |      | <i>albicans</i> )    |      |          |       |       |            | (45%)     |                              |
| 23 |                 |        |                        |      |                      |      |          |       |       |            |           |                              |
| 24 |                 |        |                        |      |                      |      |          |       |       |            |           |                              |
| 25 | Dimopouloset    | Greece | Prospective MICU, SICU | 24   | Candidemia           | 24   | —        | —     | 62.5  | —          | 16.5 (14- | C. albicans: fluconazole     |
| 26 | al.(2007) [45]  |        | cohort study           |      |                      |      |          |       |       |            | 24)*days  | Non-albicans: amphotericin B |
| 27 |                 |        |                        |      |                      |      |          |       |       |            |           |                              |
| 28 |                 |        |                        |      |                      |      |          |       |       |            |           |                              |
| 29 | Jordà-Marcos    | Spain  | prospective MICU, SICU | 1765 | Candidemia           | 63   | 63 (48 - | 71.40 | 57.10 | 6.30%      | —         | 7.90%                        |
| 30 | R (2007)        |        | cohort                 |      |                      |      | 70)†     | %     |       |            |           |                              |
| 31 |                 |        |                        |      |                      |      |          |       |       |            |           |                              |
| 32 |                 |        |                        |      |                      |      |          |       |       |            |           |                              |
| 33 |                 |        |                        |      | Control (non-        | 1072 | 63 (46 - | 66.50 | —     | 2.80%      | —         | 5.60%                        |
| 34 |                 |        |                        |      | Candidemia)          |      | 71)†     | %     |       |            |           |                              |
| 35 |                 |        |                        |      |                      |      |          |       |       |            |           |                              |
| 36 |                 |        |                        |      |                      |      |          |       |       |            |           |                              |
| 37 |                 |        |                        |      |                      |      |          |       |       |            |           |                              |
| 38 |                 |        |                        |      |                      |      |          |       |       |            |           |                              |
| 39 |                 |        |                        |      |                      |      |          |       |       |            |           |                              |
| 40 |                 |        |                        |      |                      |      |          |       |       |            |           |                              |
| 41 |                 |        |                        |      |                      |      |          |       |       |            |           |                              |
| 42 |                 |        |                        |      |                      |      |          |       |       |            |           |                              |
| 43 |                 |        |                        |      |                      |      |          |       |       |            |           |                              |
| 44 |                 |        |                        |      |                      |      |          |       |       |            |           |                              |
| 45 |                 |        |                        |      |                      |      |          |       |       |            |           |                              |
| 46 |                 |        |                        |      |                      |      |          |       |       |            |           |                              |

|                                             |        |                                |     |            |     |             |         |    |   |   |   |
|---------------------------------------------|--------|--------------------------------|-----|------------|-----|-------------|---------|----|---|---|---|
| Piazza O (2004)                             | Italy  | retrospective ICU cohort       | 478 | Candidemia | 12  | 57.58±22.07 | 58.30 % | 67 | — | — | — |
| Michalopoulos et al. (2003) <sup>[46]</sup> | Greece | Prospective case-control study | 150 | Candidemia | 30  | 63.2±9.7    | 73.30 % | 70 | — | — | — |
|                                             |        |                                |     | Control    | 120 | 64.3±9.9    | 73.30 % | —  | — | — | — |

Abbreviations: CICU, cardiothoracic ICU; CRCBSI, Catheter-related Candida bloodstream infection; Flu-R, fluconazole-resistant; Flu-S, fluconazole-sensitive; IC, Invasive candidiasis; MICU, medical ICU; SICU, surgical ICU.

Total number of enrolled patients: 7,982.

\* Data were presented as mean (range).

† Data were presented as median (range).

§ Data were presented as median (IQR).

Dash indicates no available data.



**Table 2. Length of stay, antibiotic therapy prior to candidemia onset, and overall mortality**

| Studies<br>1 <sup>st</sup> Author<br>(year) | Hospital stay<br>(days)                                                                                             | ICU length of stay<br>(days)                             | Length of<br>stay prior to<br>ICU<br>admission<br>(days) | Duration of ICU admission<br>prior to candidemia onset<br>(days)                 | Rate of antibiotic therapy prior<br>to candidemia onset                | Duration of antibiotic<br>therapy prior to<br>candidemia onset (days) | Overall mortality<br>rate                           |
|---------------------------------------------|---------------------------------------------------------------------------------------------------------------------|----------------------------------------------------------|----------------------------------------------------------|----------------------------------------------------------------------------------|------------------------------------------------------------------------|-----------------------------------------------------------------------|-----------------------------------------------------|
| Zhao H<br>(2018)                            | N/A                                                                                                                 | 24 (12-57) <sup>†</sup>                                  | N/A                                                      | N/A                                                                              | N/A                                                                    | N/A                                                                   | 58%                                                 |
| Ding R<br>(2018)                            | N/A                                                                                                                 | N/A                                                      | N/A                                                      | N/A                                                                              | Broad-spectrum antibiotics:<br>98.6%                                   | N/A                                                                   | 31.90%                                              |
| Yang et al.<br>(2017) <sup>[26]</sup>       | (prior to IC<br>diagnosis)<br>Early-onset IC:4 (2,<br>7) <sup>§</sup><br>Late-onset IC: 26<br>(16, 50) <sup>§</sup> | N/A                                                      | N/A                                                      | Early-onset IC: 4 (1, 7) <sup>§</sup><br>Late-onset IC: 17 (10, 33) <sup>§</sup> | Early-onset IC: 62 (59.0%)<br>Late-onset IC: 179 (89.1%)               | N/A                                                                   | Early-onset IC:<br>28.6%<br>Late-onset IC:<br>40.8% |
| Tukenmez<br>Tigen E<br>(2017)               | N/A                                                                                                                 | 22 (18-30) <sup>†</sup><br>5.5 (2.25-15.75) <sup>†</sup> | N/A                                                      | N/A                                                                              | Broad-spectrum antibiotic: 100%<br>Broad-spectrum antibiotic:<br>59.5% | 100% N/A                                                              | 83.30%                                              |
| Baldesi O<br>(2017)                         | N/A                                                                                                                 | 29 (18; 49) <sup>§</sup><br>7 (4; 13) <sup>§</sup>       | N/A                                                      | N/A                                                                              | antimicrobials: 82.2%<br>antimicrobials: 55.1%                         | N/A                                                                   | 52.40%<br>17.80%                                    |
| Rudramurt<br>hy SM<br>(2017)                | N/A                                                                                                                 | N/A                                                      | N/A                                                      | 10 (4.7 – 22.2) <sup>§</sup><br>7 (3 – 13) <sup>§</sup>                          | N/A                                                                    | N/A                                                                   | 41.90%<br>27%                                       |

|    |                                       |                                                                                 |                                                                                 |             |                               |                                                                                                                      |                   |                                                                                                                 |
|----|---------------------------------------|---------------------------------------------------------------------------------|---------------------------------------------------------------------------------|-------------|-------------------------------|----------------------------------------------------------------------------------------------------------------------|-------------------|-----------------------------------------------------------------------------------------------------------------|
| 1  |                                       |                                                                                 |                                                                                 |             |                               |                                                                                                                      |                   |                                                                                                                 |
| 2  |                                       |                                                                                 |                                                                                 |             |                               |                                                                                                                      |                   |                                                                                                                 |
| 3  |                                       |                                                                                 |                                                                                 |             |                               |                                                                                                                      |                   |                                                                                                                 |
| 4  |                                       |                                                                                 |                                                                                 |             |                               |                                                                                                                      |                   |                                                                                                                 |
| 5  | Kawano Y<br>(2017)                    | N/A                                                                             | N/A                                                                             | N/A         | 13 (1 – 73)†                  | Broad-spectrum antimicrobial:<br>84%                                                                                 | N/A               | 72%                                                                                                             |
| 6  |                                       |                                                                                 |                                                                                 |             |                               |                                                                                                                      |                   |                                                                                                                 |
| 7  | OrtizRuiz<br>et al.<br>(2016) [16]    | 35.4±3.0                                                                        | 21.9±1.7                                                                        | N/A         | Median 25                     | Broad-spectrum antibiotic: 93.8<br>vs. 69.8% (case vs. control)                                                      | N/A               | 39.51%                                                                                                          |
| 8  |                                       |                                                                                 |                                                                                 |             |                               |                                                                                                                      |                   |                                                                                                                 |
| 9  |                                       |                                                                                 |                                                                                 |             |                               |                                                                                                                      |                   |                                                                                                                 |
| 10 |                                       |                                                                                 |                                                                                 |             |                               |                                                                                                                      |                   |                                                                                                                 |
| 11 | Gong et al.<br>(2016) [47]            | <i>Candida albicans</i> :<br>Median: 32<br>Non- <i>albicans</i> :<br>Median: 44 | <i>Candida albicans</i> :<br>Median: 18<br>Non- <i>albicans</i> : Median:<br>29 | N/A         | N/A                           | <i>Candida albicans</i> (before<br>diagnosis): 76 (77.6%)<br>Non- <i>albicans</i> (before diagnosis):<br>121 (82.9%) | N/A               | <i>Candida albicans</i><br>(before diagnosis):<br>29.6%<br>Non-<br><i>albicans</i> (before<br>diagnosis): 26.7% |
| 12 |                                       |                                                                                 |                                                                                 |             |                               |                                                                                                                      |                   |                                                                                                                 |
| 13 |                                       |                                                                                 |                                                                                 |             |                               |                                                                                                                      |                   |                                                                                                                 |
| 14 |                                       |                                                                                 |                                                                                 |             |                               |                                                                                                                      |                   |                                                                                                                 |
| 15 |                                       |                                                                                 |                                                                                 |             |                               |                                                                                                                      |                   |                                                                                                                 |
| 16 |                                       |                                                                                 |                                                                                 |             |                               |                                                                                                                      |                   |                                                                                                                 |
| 17 |                                       |                                                                                 |                                                                                 |             |                               |                                                                                                                      |                   |                                                                                                                 |
| 18 | Playford<br>EG (2016)                 | 51 (34 – 89)§<br>23 (13 – 40)§                                                  | 21 ( 14 – 32)§<br>8 ( 5 – 12)§                                                  | N/A         | 10 (5 – 15.25 )†              | N/A                                                                                                                  | N/A               | 26%<br>18.3%                                                                                                    |
| 19 |                                       |                                                                                 |                                                                                 |             |                               |                                                                                                                      |                   |                                                                                                                 |
| 20 |                                       |                                                                                 |                                                                                 |             |                               |                                                                                                                      |                   |                                                                                                                 |
| 21 | Pinhati<br>HM (2016)                  | N/A                                                                             | N/A                                                                             | N/A         | 22 (0 – 83)†<br>25 (7 – 134)† | any: 47.6%<br>any: 42.1%                                                                                             | N/A               | 42.9%<br>47.4%                                                                                                  |
| 22 |                                       |                                                                                 |                                                                                 |             |                               |                                                                                                                      |                   |                                                                                                                 |
| 23 |                                       |                                                                                 |                                                                                 |             |                               |                                                                                                                      |                   |                                                                                                                 |
| 24 | Aguilar et<br>al. (2015)<br>[15]      | N/A                                                                             | N/A                                                                             | N/A         | 20 (5, 37.5) §                | Antibiotic therapy:21 (95.4 %)                                                                                       | 10 (5.0–16.5)†    | 13.60%                                                                                                          |
| 25 |                                       |                                                                                 |                                                                                 |             |                               |                                                                                                                      |                   |                                                                                                                 |
| 26 |                                       |                                                                                 |                                                                                 |             |                               |                                                                                                                      |                   |                                                                                                                 |
| 27 |                                       |                                                                                 |                                                                                 |             |                               |                                                                                                                      |                   |                                                                                                                 |
| 28 | Fochtman<br>et al.<br>(2015) [27]     | N/A                                                                             | 60 (13–176) †                                                                   | N/A         | 16 (6–89) †                   | Broad-spectrum antibiotic<br>treatment in most patients                                                              | 16 (6–89)†        | 30%                                                                                                             |
| 29 |                                       |                                                                                 |                                                                                 |             |                               |                                                                                                                      |                   |                                                                                                                 |
| 30 |                                       |                                                                                 |                                                                                 |             |                               |                                                                                                                      |                   |                                                                                                                 |
| 31 | Klingspore<br>t al.(2015)<br>[28]     | N/A                                                                             | 23 (0–329) †                                                                    | 2 (0-744) † | 12 (0–190) †                  | Broad-spectrum antibiotics in the<br>last 2 weeks: 511 (78.4%)                                                       | N/A               | 38.80%                                                                                                          |
| 32 |                                       |                                                                                 |                                                                                 |             |                               |                                                                                                                      |                   |                                                                                                                 |
| 33 |                                       |                                                                                 |                                                                                 |             |                               |                                                                                                                      |                   |                                                                                                                 |
| 34 |                                       |                                                                                 |                                                                                 |             |                               |                                                                                                                      |                   |                                                                                                                 |
| 35 | Chakrabart<br>i et al.<br>(2015) [29] | N/A                                                                             | N/A                                                                             | N/A         | 8 (4, 15) §                   | Candidemia patients received:<br>antibiotics:93.0%                                                                   | 16.0 (7–36) days§ | 44.70%                                                                                                          |
| 36 |                                       |                                                                                 |                                                                                 |             |                               |                                                                                                                      |                   |                                                                                                                 |
| 37 |                                       |                                                                                 |                                                                                 |             |                               |                                                                                                                      |                   |                                                                                                                 |
| 38 |                                       |                                                                                 |                                                                                 |             |                               |                                                                                                                      |                   |                                                                                                                 |
| 39 |                                       |                                                                                 |                                                                                 |             |                               |                                                                                                                      |                   |                                                                                                                 |
| 40 |                                       |                                                                                 |                                                                                 |             |                               |                                                                                                                      |                   |                                                                                                                 |
| 41 |                                       |                                                                                 |                                                                                 |             |                               |                                                                                                                      |                   |                                                                                                                 |
| 42 |                                       |                                                                                 |                                                                                 |             |                               |                                                                                                                      |                   |                                                                                                                 |
| 43 |                                       |                                                                                 |                                                                                 |             |                               |                                                                                                                      |                   |                                                                                                                 |
| 44 |                                       |                                                                                 |                                                                                 |             |                               |                                                                                                                      |                   |                                                                                                                 |
| 45 |                                       |                                                                                 |                                                                                 |             |                               |                                                                                                                      |                   |                                                                                                                 |
| 46 |                                       |                                                                                 |                                                                                 |             |                               |                                                                                                                      |                   |                                                                                                                 |

1  
2  
3  
4  
5  
6  
7  
8  
9  
10  
11  
12  
13  
14  
15  
16  
17  
18  
19  
20  
21  
22  
23  
24  
25  
26  
27  
28  
29  
30  
31  
32  
33  
34  
35  
36  
37  
38  
39  
40  
41  
42  
43  
44  
45  
46

|                             |                                              |                                                  |                             |                                                     |                                                                   |                                                    |                              |
|-----------------------------|----------------------------------------------|--------------------------------------------------|-----------------------------|-----------------------------------------------------|-------------------------------------------------------------------|----------------------------------------------------|------------------------------|
| Liao et al. (2015) [14]     | Flu-S: 34.5 (18, 65)<br>Flu-R: 48.0 (21, 90) | Flu-S: 22.5 (10.0, 40.0)<br>Flu-R: 29.0 (17, 59) | N/A                         | Flu-S: 8.0 (3.0, 17.0)§<br>Flu-R: 10.5 (4.0, 27.0)§ | ≥5 d before diagnosis:<br>Flu-S: 101 (78.3%)<br>Flu-R: 73 (81.1%) | N/A                                                | Flu-S: 31.8%<br>Flu-R: 41.1% |
| Kautzky S (2015)            | N/A                                          | 46 (14 - 74)†<br>21 (10 - 77)†                   | 17 (1 - 21)†<br>3 (1 - 66)† | 17.4 ± 14.5                                         | 100%<br>90%                                                       | N/A                                                | 80%<br>21.7%                 |
| Karacaer et al. (2014) [31] | 46.8±36.7 (5-190)                            | 32.9±36.9 (0-190)                                | N/A                         | N/A                                                 | N/A                                                               | 15 ± 13.8                                          | 77.70%                       |
| Colombo et al. (2014) [32]  | N/A                                          | N/A                                              | N/A                         | 20 (0-188) †                                        | Prior antibiotic expose: 96.1%                                    | N/A                                                | 70.30%                       |
| Hu et al.(2014) [48]        | 54.0 (26.0-91.0) §                           | 34.0 (18.0-71.0) §                               | N/A                         | 11.0 (4.0, 26.0)§                                   | CRCBSI: 100%<br>N CRCBSI:99.5%                                    | CRCBSI: 11.4 ± 4.2 days;<br>N CRCBSI:10.6 ±6.5 day | 44.80%                       |
| Lortholary O (2014)         | N/A                                          | N/A                                              | N/A                         | N/A                                                 | N/A                                                               | N/A                                                | 51.00%<br>30.70%             |
| Yapar N (2014)              | N/A                                          | 30.9±33<br>12.9±13                               | N/A                         | N/A                                                 | 96.9%<br>78.3%                                                    | N/A                                                | 43.9%<br>32.2%               |
| Guo et al.(2013) [49]       | N/A                                          | N/A                                              | N/A                         | 10 (0-330)†                                         | Treatment before diagnostic confirm: 74 (27.6%)                   | N/A                                                | 36.60%                       |
| Giri S (2013)               | N/A                                          | mean 26.4 (range 9-86) days                      | N/A                         | N/A                                                 | 66.70%                                                            | mean 19.45 (range 4-31) days                       | 24%                          |

|    |                                 |                                |             |                                 |                                   |                                  |                            |  |
|----|---------------------------------|--------------------------------|-------------|---------------------------------|-----------------------------------|----------------------------------|----------------------------|--|
| 1  |                                 |                                |             |                                 |                                   |                                  |                            |  |
| 2  |                                 |                                |             |                                 |                                   |                                  |                            |  |
| 3  |                                 |                                |             |                                 |                                   |                                  |                            |  |
| 4  |                                 |                                |             |                                 |                                   |                                  |                            |  |
| 5  | Tortorano N/A                   | N/A                            | N/A         | 22.8 (2–190)†                   | broad spectrum antibiotic         | N/A                              | 46.20%                     |  |
| 6  | et al.(2012)                    |                                |             |                                 | treatment: 85%                    |                                  |                            |  |
| 7  | [33]                            |                                |             |                                 |                                   |                                  |                            |  |
| 8  | Ylipalosaar 38.0 (22- 59) §     | 16.0 (11-30) §                 | 1 (0-2) §   | 8.0 (1.0, 12.0) §               | Previous antibacterial treatment  | N/A                              | 65.80%                     |  |
| 9  | i et al.                        |                                |             |                                 | (%): 97.4-95.5%                   |                                  |                            |  |
| 10 | (2012) [34]                     |                                |             |                                 |                                   |                                  |                            |  |
| 11 |                                 |                                |             |                                 |                                   |                                  |                            |  |
| 12 | Pasero D et N/A                 | 21±7                           | N/A         | 20 (8, 49) §                    | A significantly higher            | N/A                              | 47%                        |  |
| 13 | al. (2011)                      |                                |             |                                 | administration of > 2 antibiotics |                                  |                            |  |
| 14 | [35]                            |                                |             |                                 | for >72 hours.                    |                                  |                            |  |
| 15 |                                 |                                |             |                                 |                                   |                                  |                            |  |
| 16 | Han SS et 38 (2-141)§           | 22 (1-141)§                    | 8 (0-92) §  | 17 (0-117) †                    | All patients were treated with    | 16 (1-92) †                      | 96.00%                     |  |
| 17 | al. (2010)                      |                                |             |                                 | antibiotics prior to candidaemia  |                                  |                            |  |
| 18 | [36]                            |                                |             |                                 | onset                             |                                  |                            |  |
| 19 |                                 |                                |             |                                 |                                   |                                  |                            |  |
| 20 | Pratikaki N/A                   | 25 (14-46)§                    | 14 (1-20) § | 10 (3, 22) §                    | All patients received             | N/A                              | 60.60%                     |  |
| 21 | M et al.                        |                                |             |                                 | antimicrobial agents prior to     |                                  |                            |  |
| 22 | (2009) [37]                     |                                |             |                                 | candidaemia onset                 |                                  |                            |  |
| 23 |                                 |                                |             |                                 |                                   |                                  |                            |  |
| 24 | Playford et N/A                 | NA                             | N/A         | 10 (4, 16) §                    | Antibiotic receipt on days 1–3:   | N/A                              | 10.60%                     |  |
| 25 | al.(2009)                       |                                |             |                                 | 83.4%;                            |                                  |                            |  |
| 26 | [38]                            |                                |             |                                 | Broad-spectrum antibiotic receipt |                                  |                            |  |
| 27 |                                 |                                |             |                                 | on days 1–3: 82.0%                |                                  |                            |  |
| 28 |                                 |                                |             |                                 |                                   |                                  |                            |  |
| 29 | Holleyetal. N/A                 | <i>C. albicans</i> : 29.0±18.5 | N/A         | N/A                             | All patients received             | <i>C. albicans</i> : 13 (median) | <i>C. albicans</i> : 52.9% |  |
| 30 | (2009) [39]                     | non- <i>C. albicans</i> : 29.2 |             |                                 | antimicrobial agents prior to     | non- <i>C. albicans</i> : 15     | non- <i>C. albicans</i> :  |  |
| 31 |                                 | ±28.2                          |             |                                 | candidaemia onset                 | (median)                         | 64.7%                      |  |
| 32 |                                 |                                |             |                                 |                                   |                                  |                            |  |
| 33 | Choi et al. (prior to fungemia) | <i>Candida albicans</i> :      | N/A         | <i>Candida albicans</i> : 11±25 | N/A                               | N/A                              | <i>Candida albicans</i> :  |  |
| 34 | (2009) [40]                     | <i>Candida albicans</i> :      |             | Non- <i>albicans</i> : 15±31    |                                   |                                  | 48%                        |  |
| 35 |                                 | 42±47                          |             |                                 |                                   |                                  | Non- <i>albicans</i> : 67% |  |
| 36 |                                 | Non- <i>albicans</i> :         |             |                                 |                                   |                                  |                            |  |
| 37 |                                 | 38±33                          |             |                                 |                                   |                                  |                            |  |
| 38 |                                 |                                |             |                                 |                                   |                                  |                            |  |
| 39 |                                 |                                |             |                                 |                                   |                                  |                            |  |
| 40 |                                 |                                |             |                                 |                                   |                                  |                            |  |
| 41 |                                 |                                |             |                                 |                                   |                                  |                            |  |
| 42 |                                 |                                |             |                                 |                                   |                                  |                            |  |
| 43 |                                 |                                |             |                                 |                                   |                                  |                            |  |
| 44 |                                 |                                |             |                                 |                                   |                                  |                            |  |
| 45 |                                 |                                |             |                                 |                                   |                                  |                            |  |
| 46 |                                 |                                |             |                                 |                                   |                                  |                            |  |

|    |                               |                                                                             |                                                                             |     |                                                                                  |                                                                                                                     |                 |                                                              |
|----|-------------------------------|-----------------------------------------------------------------------------|-----------------------------------------------------------------------------|-----|----------------------------------------------------------------------------------|---------------------------------------------------------------------------------------------------------------------|-----------------|--------------------------------------------------------------|
| 1  |                               |                                                                             |                                                                             |     |                                                                                  |                                                                                                                     |                 |                                                              |
| 2  |                               |                                                                             |                                                                             |     |                                                                                  |                                                                                                                     |                 |                                                              |
| 3  |                               |                                                                             |                                                                             |     |                                                                                  |                                                                                                                     |                 |                                                              |
| 4  |                               |                                                                             |                                                                             |     |                                                                                  |                                                                                                                     |                 |                                                              |
| 5  | Yap et al (2009) [50]         | 28 (17-54) §                                                                | 14 (5-23) §                                                                 | N/A | 6 (1-13)§                                                                        | Antibiotics > 48 hours before candidaemia:<br><i>C. albicans</i> : 70 (97.0%)<br><i>non-C. albicans</i> : 56 (100%) | N/A             | 70%                                                          |
| 6  |                               |                                                                             |                                                                             |     |                                                                                  |                                                                                                                     |                 |                                                              |
| 7  |                               |                                                                             |                                                                             |     |                                                                                  |                                                                                                                     |                 |                                                              |
| 8  |                               |                                                                             |                                                                             |     |                                                                                  |                                                                                                                     |                 |                                                              |
| 9  | Chow et al. (2008) [41]       | <i>Candida albicans</i> : 28 (20–42)§<br>Non- <i>albicans</i> : 37 (24–57)§ | <i>Candida albicans</i> : 22 (15–33)§<br>Non- <i>albicans</i> : 25 (14–40)§ | N/A | <i>Candida albicans</i> : 11 (9, 17) §<br>Non- <i>C. albicans</i> : 10 (4, 21) § | Non- <i>C. albicans</i> : 0.75 (0–2) §                                                                              | 2.21 (1.4–2.7)§ | <i>Candida albicans</i> : 58%<br>Non- <i>albicans</i> : 57%; |
| 10 |                               |                                                                             |                                                                             |     |                                                                                  |                                                                                                                     |                 |                                                              |
| 11 |                               |                                                                             |                                                                             |     |                                                                                  |                                                                                                                     |                 |                                                              |
| 12 |                               |                                                                             |                                                                             |     |                                                                                  |                                                                                                                     |                 |                                                              |
| 13 |                               |                                                                             |                                                                             |     |                                                                                  |                                                                                                                     |                 |                                                              |
| 14 | Bougnoux et al.(2008) [42]    | N/A                                                                         | 43.1 ± 45.2                                                                 | N/A | 19.0 ± 2.9 or (13.0; 2-145)§                                                     | No antibiotic treatment is reported                                                                                 | N/A             | 61.80%                                                       |
| 15 |                               |                                                                             |                                                                             |     |                                                                                  |                                                                                                                     |                 |                                                              |
| 16 |                               |                                                                             |                                                                             |     |                                                                                  |                                                                                                                     |                 |                                                              |
| 17 |                               |                                                                             |                                                                             |     |                                                                                  |                                                                                                                     |                 |                                                              |
| 18 | Girãoet al.(2008) [43]        | N/A                                                                         | N/A                                                                         | N/A | <i>C. albicans</i> : 15 (mean)<br>Non- <i>C. albicans</i> : 18 (mean)            | The hospital is restricted the use of several antibiotics                                                           | N/A             | <i>C. albicans</i> : 72%<br>non- <i>C. albicans</i> : 80%    |
| 19 |                               |                                                                             |                                                                             |     |                                                                                  |                                                                                                                     |                 |                                                              |
| 20 |                               |                                                                             |                                                                             |     |                                                                                  |                                                                                                                     |                 |                                                              |
| 21 |                               |                                                                             |                                                                             |     |                                                                                  |                                                                                                                     |                 |                                                              |
| 22 | Dimopoulos et al. (2008) [44] | <i>C. albicans</i> : 22 ± 7.6<br>non- <i>C. albicans</i> : 25 ± 8.4         | N/A                                                                         | N/A | <i>C. albicans</i> : 12 ± 2.2<br>non- <i>C. albicans</i> : 10 ± 2.4              | 100% of patients received broad spectrum antibiotic treatment for >3 days during the ICU stay.                      | N/A             | <i>C. albicans</i> : 52.8%<br>non- <i>C. albicans</i> : 90%  |
| 23 |                               |                                                                             |                                                                             |     |                                                                                  |                                                                                                                     |                 |                                                              |
| 24 |                               |                                                                             |                                                                             |     |                                                                                  |                                                                                                                     |                 |                                                              |
| 25 |                               |                                                                             |                                                                             |     |                                                                                  |                                                                                                                     |                 |                                                              |
| 26 |                               |                                                                             |                                                                             |     |                                                                                  |                                                                                                                     |                 |                                                              |
| 27 | Dimopoulos et al.(2007) [45]  | N/A                                                                         | N/A                                                                         | N/A | 9 (5–11) †                                                                       | 100% of patients received broad spectrum antibiotic treatment                                                       | N/A             | N/A                                                          |
| 28 |                               |                                                                             |                                                                             |     |                                                                                  |                                                                                                                     |                 |                                                              |
| 29 |                               |                                                                             |                                                                             |     |                                                                                  |                                                                                                                     |                 |                                                              |
| 30 |                               |                                                                             |                                                                             |     |                                                                                  |                                                                                                                     |                 |                                                              |
| 31 | Jordão-Marcos R (2007)        | 48 (26 – 69)                                                                | 28 (17 – 45)                                                                | N/A | 23.5 ± 54.7                                                                      | 100%                                                                                                                | N/A             | 17.2%                                                        |
| 32 |                               | 35 (22 – 57)                                                                | 18 (12 – 28)                                                                |     |                                                                                  | 96.5%                                                                                                               |                 | 13.2%                                                        |
| 33 |                               |                                                                             |                                                                             |     |                                                                                  |                                                                                                                     |                 |                                                              |
| 34 |                               |                                                                             |                                                                             |     |                                                                                  |                                                                                                                     |                 |                                                              |
| 35 | Piazza O (2004)               | N/A                                                                         | N/A                                                                         | N/A | median 13 days                                                                   | N/A                                                                                                                 | N/A             | 67%                                                          |
| 36 |                               |                                                                             |                                                                             |     |                                                                                  |                                                                                                                     |                 |                                                              |
| 37 |                               |                                                                             |                                                                             |     |                                                                                  |                                                                                                                     |                 |                                                              |
| 38 |                               |                                                                             |                                                                             |     |                                                                                  |                                                                                                                     |                 |                                                              |
| 39 |                               |                                                                             |                                                                             |     |                                                                                  |                                                                                                                     |                 |                                                              |
| 40 |                               |                                                                             |                                                                             |     |                                                                                  |                                                                                                                     |                 |                                                              |
| 41 |                               |                                                                             |                                                                             |     |                                                                                  |                                                                                                                     |                 |                                                              |
| 42 |                               |                                                                             |                                                                             |     |                                                                                  |                                                                                                                     |                 |                                                              |
| 43 |                               |                                                                             |                                                                             |     |                                                                                  |                                                                                                                     |                 |                                                              |
| 44 |                               |                                                                             |                                                                             |     |                                                                                  |                                                                                                                     |                 |                                                              |
| 45 |                               |                                                                             |                                                                             |     |                                                                                  |                                                                                                                     |                 |                                                              |
| 46 |                               |                                                                             |                                                                             |     |                                                                                  |                                                                                                                     |                 |                                                              |

|   |             |     |            |     |              |                                       |
|---|-------------|-----|------------|-----|--------------|---------------------------------------|
| 1 |             |     |            |     |              |                                       |
| 2 |             |     |            |     |              |                                       |
| 3 |             |     |            |     |              |                                       |
| 4 |             |     |            |     |              |                                       |
| 5 | Michalopo   | N/A | 27.1 ± 7.5 | N/A | 15 (11-23) † | Empiric antibiotic therapy with 2 N/A |
| 6 | ulos et al. |     |            |     |              | or more broad-spectrum agents         |
| 7 | (2003) [46] |     |            |     |              | for all patients                      |
| 8 |             |     |            |     |              |                                       |

9 Abbreviation: ARDS, acute respiratory distress syndrome; CPB, cardiopulmonary bypass; CRCBSI, Candida catheter-related bloodstream infection; Flu-R, fluconazole-resistant; Flu-S, fluconazole-sensitive; IC, invasive candidiasis; IMV, invasive mechanical ventilation; N/A, not available; SAPS II, Simplified Acute Physiology Score II; TPN, total parenteral nutrition.

12 § Data are presented as median (interquartile range; IQR).

14 † Data are presented as median (range).

For peer review only

1  
2  
3 Five studies reported the mean ICU stay prior to onset of candidemia. In 4 studies,  
4  
5 the median ICU stay was  $\leq 10$  days, including the early-onset group in the study by  
6  
7 Yang et al [25] and Flu-S group in the study by Liao et al. [14] with the overall  
8  
9 mortality ranged from 28.6% to 70.0%. Three studies reported that the median ICU  
10  
11 stay was  $>10$  days prior to candidemia onset with the overall mortality ranged from  
12  
13  
14  
15 40.8% to 44.8%.  
16

17 Similar to other countries, most of the patients with IC in China received  
18  
19 antibiotic treatment prior to candidemia onset in the ICU, which was ranged from  
20  
21 59.0% of patients in the early-onset group [25] to 100% in the CRCBSI group and  
22  
23 non-*C. albicans* group [49, 51]. Only one study reported the median duration of  
24  
25 antibiotic therapy prior to candidemia onset, which was ranged from 10.6 to 11.4 days  
26  
27  
28 [49].  
29  
30  
31  
32

### 33 **Meta-analysis**

#### 34 ***Summary of the clinical outcomes for overall studies or given subgroups***

35  
36 The summary of variables such as hospital length of stay, ICU length of stay, duration  
37  
38 of ICU admission prior to candidemia onset, length of stay prior to ICU admission,  
39  
40 and overall mortality was presented in Table 3. Five studies [14, 25, 47-49] were from  
41  
42 China by using China-SCAN patient data, in which four studies were excluded to  
43  
44  
45 avoid using repeating data.  
46  
47  
48  
49  
50  
51  
52  
53  
54  
55  
56  
57  
58  
59  
60

**Table 3. Summary for length of hospital stay, length of ICU stay, duration of ICU admission prior to candidemia onset, and overall mortality for overall or given subgroups<sup>†‡</sup>**

| Comparison                             | Length of hospital stay, days    | ICU length of stay, days         | Duration of ICU admission prior to candidemia onset, days | Length of stay prior to ICU admission, days | Overall mortality                |
|----------------------------------------|----------------------------------|----------------------------------|-----------------------------------------------------------|---------------------------------------------|----------------------------------|
|                                        | Mean (95%CI.)                    | Mean (95%CI.)                    | Mean (95%CI.)                                             | Mean (95%CI.)                               | Rate (95%CI.)                    |
| <b>Overall</b>                         | 36.26(25.84, 46.67)              | 25.83(23.58, 28.07)              | 12.93(11.70, 14.15)                                       | 11.71(0.37, 23.05)                          | 49.25(45.02, 53.48)              |
| <b>Overall optional<sup>abcd</sup></b> | <sup>a</sup> 37.49(33.33, 41.64) | <sup>b</sup> 25.90(23.48, 28.33) | <sup>c</sup> 13.73(12.46, 15.00)                          | —                                           | <sup>d</sup> 50.99(46.57, 55.41) |
| <b>Subgroups</b>                       |                                  |                                  |                                                           |                                             |                                  |
| <b>Type of study</b>                   |                                  |                                  |                                                           |                                             |                                  |
| Prospective                            | 41.01(32.93, 49.09)              | 27.43(24.59, 30.27)              | 12.92(11.47, 14.37)                                       | 19.21(17.15, 21.27)                         | 42.65(37.89, 47.40)              |
| Retrospective/<br>Cross-sectional      | 31.86(18.22, 45.50)              | 23.85(21.12, 26.57)              | 13.70(11.16, 16.24)                                       | 7.39 (-3.65, 18.44)                         | 56.50(47.95, 65.04)              |
| <b>Presence of neutropenia</b>         |                                  |                                  |                                                           |                                             |                                  |
| Neutropenia                            | 34.93(19.79, 50.07)              | 25.42(19.33, 31.50)              | 11.64(9.53, 13.75)                                        | —                                           | 49.55(40.80, 58.30)              |
| Non-neutropenia                        | 22.94(20.88, 25.00)              | —                                | 10.00(9.26, 10.74)                                        | —                                           | 41.32(7.94, 74.71)               |
| <b>Type of ICU</b>                     |                                  |                                  |                                                           |                                             |                                  |
| ICU                                    | 37.73(21.74, 53.71)              | 27.28(24.89, 29.67)              | 14.32(5.66, 5.98)                                         | 17.17(11.90, 22.44)                         | 49.78(44.285, 55.27)             |
| SICU                                   | —                                | 21.66(19.45, 23.86)              | 17.31(11.93, 22.70)                                       | —                                           | 33.12(15.16, 51.07)              |



|    |                      |                     |                     |                       |                     |                      |
|----|----------------------|---------------------|---------------------|-----------------------|---------------------|----------------------|
| 1  |                      |                     |                     |                       |                     |                      |
| 2  |                      |                     |                     |                       |                     |                      |
| 3  |                      |                     |                     |                       |                     |                      |
| 4  |                      |                     |                     |                       |                     |                      |
| 5  | MICU                 | —                   | 32.74(10.25, 55.23) | 17.00(16.22, 17.78)   | —                   | 88.44(72.78, 104.10) |
| 6  | MICU+SICU            | 34.64(28.17, 41.11) | 22.50(18.41, 26.59) | 10.93(9.55, 12.31)    | —                   | 45.71(36.42, 55.00)  |
| 7  |                      |                     |                     |                       |                     |                      |
| 8  | C. Albicans          |                     |                     |                       |                     |                      |
| 9  |                      |                     |                     |                       |                     |                      |
| 10 | C. Albicans          | 34.17(33.08, 35.26) | 25.91(22.29, 29.53) | 11.00(10.71, 11.29)   | —                   | 52.19(40.01, 64.38)  |
| 11 |                      |                     |                     |                       |                     |                      |
| 12 | Non C. Albicans      | 27.01(24.25, 29.78) | 24.97(18.02, 31.92) | —                     | —                   | —                    |
| 13 |                      |                     |                     |                       |                     |                      |
| 14 | <b>Presence of</b>   |                     |                     |                       |                     |                      |
| 15 | <b>IC/candidemia</b> |                     |                     |                       |                     |                      |
| 16 | Candidemia           | 36.34(32.89, 39.79) | 25.76(23.23, 28.28) | 13.24(11.96, 14.53)   | 10.84(-1.96,23.64)  | 51.43(47.05, 55.82)  |
| 17 |                      |                     |                     |                       |                     |                      |
| 18 | IC                   | 33.85(-3.74, 71.43) | 26.42(20.71, 32.13) | 11.47(7.63, 15.31)    | —                   | 38.94(27.77, 50.10)  |
| 19 |                      |                     |                     |                       |                     |                      |
| 20 | <b>Region</b>        |                     |                     |                       |                     |                      |
| 21 |                      |                     |                     |                       |                     |                      |
| 22 | Asia                 | 36.88(22.95, 50.80) | 24.95(20.92, 28.98) | 17.39(14.62, 20.15)   | 19.31(17.21, 21.42) | 51.16(44.65, 57.67)  |
| 23 |                      |                     |                     |                       |                     |                      |
| 24 | Europe/US/Australia  | 33.26(20.74, 45.79) | 27.67(23.27, 32.07) | 18.51(15.28, 21.74)   | 9.61 (-1.20, 20.4)  | 48.58(42.43, 54.73)  |
| 25 |                      |                     |                     |                       |                     |                      |
| 26 | South America        | —                   | —                   | 45.76(27.84, 63.69) * | —                   | 54.37(38.02, 70.72)  |
| 27 |                      |                     |                     |                       |                     |                      |
| 28 |                      |                     |                     |                       |                     |                      |
| 29 |                      |                     |                     |                       |                     |                      |
| 30 |                      |                     |                     |                       |                     |                      |
| 31 |                      |                     |                     |                       |                     |                      |
| 32 |                      |                     |                     |                       |                     |                      |
| 33 |                      |                     |                     |                       |                     |                      |
| 34 |                      |                     |                     |                       |                     |                      |
| 35 |                      |                     |                     |                       |                     |                      |
| 36 |                      |                     |                     |                       |                     |                      |
| 37 |                      |                     |                     |                       |                     |                      |
| 38 |                      |                     |                     |                       |                     |                      |
| 39 |                      |                     |                     |                       |                     |                      |
| 40 |                      |                     |                     |                       |                     |                      |
| 41 |                      |                     |                     |                       |                     |                      |
| 42 |                      |                     |                     |                       |                     |                      |
| 43 |                      |                     |                     |                       |                     |                      |
| 44 |                      |                     |                     |                       |                     |                      |
| 45 |                      |                     |                     |                       |                     |                      |
| 46 |                      |                     |                     |                       |                     |                      |

Note: Certain subgroups have only 1 study (degree of freedom = 0).

<sup>a</sup> Excluded Yang et al. (2017), Gong et al (2016), Liao et al. (2015), and Guo et al. (2013).

<sup>b</sup> Excluded Yang et al. (2017), Gong et al (2016), Liao et al. (2015), and Guo et al. (2013).

<sup>c</sup> Excluded Yang et al. (2017), Gong et al (2016), Liao et al. (2015), and Hu et al. (2014).

<sup>d</sup> Excluded Yang et al. (2017), Gong et al (2016), Liao et al. (2015), and Hu et al. (2014).

Dash indicates no available

<sup>†</sup> The range width of 95% CI is related to the accuracy of the estimation. The narrower the range, the higher the accuracy of the estimation. If both the upper and lower limits are positive, the clinical outcome estimate for this group of participants is obviously positive, if the lower limit negative and the upper limit is positive, indicating that the clinical outcome estimate for this type of participants is not significantly greater than 0.

<sup>‡</sup>Meta-regression is used to assess the relationship between study level covariates and effect size when obvious heterogeneity in subgroups.

\* Meta-regression analysis illustrated the South American countries were significantly longer than the Asian, European, Australian, and North American countries in the mean of duration of ICU admission prior to candidemia onset (Asia as reference group, South America  $\beta = 25.83$ ,  $p = 0.0308$ ,  $R^2 = 0.097$ ). Other meta-regression analysis in subgroups in this table did not reach statistical significance.

For overall studies, the length of hospital stay, length of ICU stay, duration of ICU admission prior to candidemia onset, length of stay prior to ICU admission and overall mortality rate were derived as a mean of 36.26 days (95% CI: 25.84 - 46.67), 25.83 days (95% CI: 23.58 - 28.07), 12.93 days (95% CI: 11.70 - 14.15), 11.71 days (95% CI: 0.365 - 23.05), and rate of 49.25% (95% CI: 45.02% - 53.48%), respectively. When the four China-SCANE studies were excluded from the analysis, length of hospital stay, length of ICU stay, duration of ICU admission prior to candidemia onset were derived as a mean of 37.49 days (95% CI: 33.33 - 41.64), 25.90 days (95% CI: 23.48 - 28.33), 13.73 days (95% CI: 12.46 - 15.00), and the overall mortality was 50.99% (95% CI: 46.57% - 55.41%), respectively (Table 3). The clinical outcomes were also summarized for subgroups of studies (with studies' number  $\geq 2$ ) given the type of study, presence of neutropenia, type of ICU, type of *C. Albicans* isolated, presence of IC/candidemia, and region of countries. The interval estimate showed the summarized statistics of subgroups were all significant except for

1  
2  
3 length of hospital stay of patients with IC present, length of stay prior to ICU  
4 admission of patients selected from retrospective or cross-sectional type of studies and  
5 patients with candidemia presents (95% CI included zero) (Table 3).  
6  
7  
8  
9

10 According to the summarized statistics, those studies with neutropenic patients  
11 had a greater length of hospital stay (mean=34.93 vs. 22.94 days), a longer duration of  
12 ICU admission prior to candidemia onset (mean=11.64 vs. 10.0 days), and a higher  
13 overall mortality rate (rate: 49.55% vs. 41.32%) compared to those with non-  
14 neutropenic patients. The duration of ICU admission prior to candidemia onset had a  
15 mean of 17.31 days, 17 days, 14.32 days, and 10.93 days for studies with patients in  
16 surgical ICU (SICU), medical ICU (MICU), ICU, and MICU+SICU, respectively.  
17 Patients with candidemia had a greater length of hospital stay (mean=36.34 vs. 33.85),  
18 longer duration of ICU admission prior to candidemia onset (mean=13.24 vs. 11.47),  
19 and a higher overall mortality rate (51.43% vs. 38.94%) compared with patients  
20 without IC. However, patients with candidemia had a shorter length of ICU stay  
21 (mean=25.76 vs. 26.42 days) and length of stay prior to ICU admission (mean=10.84  
22 vs. 15.20 days) than patients with IC. Furthermore, patients with *C. albicans* also had  
23 a higher duration of ICU admission prior to candidemia onset compared to patients  
24 with other species of *C. albicans* (mean=11 vs. 10 days). The mean duration of ICU  
25 admission prior to candidemia onset in patients in hospitals was 18.51 days (95%  
26 CI=15.28 – 21.74 days) in Europe, 17.39 days (95% CI: 14.62 – 20.15 days) in Asia,  
27 and 45.77 days (95% CI: 27.84 – 63.69 days) in South America. Data from Giro et  
28 al.[43] and Gong et al.[47] were excluded from the summarized analysis due to a lack  
29 of standard deviations for mean values and unavailability of data ranges.  
30  
31  
32  
33  
34  
35  
36  
37  
38  
39  
40  
41  
42  
43  
44  
45  
46  
47  
48  
49  
50  
51  
52  
53  
54  
55  
56  
57  
58  
59  
60

1  
2  
3 ***Broad-spectrum antibiotic use prior to candidemia onset, length of stay prior to***  
4  
5 ***ICU admission, and overall mortality***  
6  
7

8 In order to compare whether there is a differences in the proportion of broad-spectrum  
9 antibiotic use between IC patients and non-IC patients, we reviewed the identified  
10 publications and excluded studies containing control groups (non-invasive candida  
11 infection) and studies with a clear number of broad-spectrum antibiotics utilized.  
12  
13  
14

15  
16 After pooling the study data, IC patients were found to have utilized a higher  
17 proportion of broad-spectrum antibiotics (89.13%, 95% CI: 82.68%-93.37%) before  
18 IC onset, which was higher than non-IC patients (77.36%, 95% CI: 52.25%-91.43%),  
19 even if it has not yet reached statistical significance. The mean duration of antibiotic  
20 therapy prior to candidemia onset was 17.77 days (95% CI: 9.30 - 26.25), but the  
21 duration of broad-spectrum antibiotic use prior to the infection was not included due  
22 to the limitation of data. Only five studies reported length of stay prior to ICU  
23 admission and the mean was 11.71 days (95% CI: 0.37 - 23.05). The overall mortality  
24 rate was increased from 49.25% to 50.99% after excluding four China-SCAN studies  
25 (Table 3).  
26  
27  
28  
29  
30  
31  
32  
33  
34  
35  
36  
37  
38  
39  
40  
41

42 ***Comparing the effect between *Candida albicans* vs. non-*Candida albicans****  
43

44 A meta-analysis was performed to compare the effect of length of hospital stay, ICU  
45 length of stay, and overall mortality between studies of patients infected with *C.*  
46 *albicans* and different strains of *Candida*. Three studies examined length of hospital  
47 stay (Choi et al 2009, Chow et al. 2008, Dimopoulos et al 2008), three studies  
48 examined ICU length of stay (Holley et al 2009, Choi et al 2009, Chow et al. 2008),  
49 and six studies examined overall mortality (Gong et al 2016, Holley et al 2009, Choi  
50 et al 2009, Chow et al. 2008, Giral et al 2008, Dimopoulos et al 2008) and were  
51  
52  
53  
54  
55  
56  
57  
58  
59  
60

1  
2  
3 selected for the meta-analysis. According to the heterogeneity test, a random effect  
4 model was applied for length of hospital stay (Q value=25.47, I-squared value =  
5  
6 92.1%,  $p<0.001$ ) and overall mortality rate (Q-value=399, I-squared value=98.7%,  
7  
8  $p<0.001$ ) and a fixed effect model for ICU length of stay (Q value = 1.56, I-squared  
9  
10 value = 0%,  $p=0.458$ ). The pooled effect demonstrated that there was no significant  
11  
12 difference in length of stay and overall mortality between patients with and without *C.*  
13  
14 *albicans* (Figure 2A, 2C; both  $p>0.05$ ). However, there was a significant difference in  
15  
16 mean length of ICU stay between patients with and without *C. albicans* (difference in  
17  
18 means = 2.82 days, Figure 2B,  $P<0.001$ ).  
19  
20  
21  
22  
23  
24  
25  
26

### 27 ***Quality assessment***

28  
29 The results of the quality assessment are shown in Table 4. For the results of  
30  
31 ROBINS-I, 9 studies had serious bias due to confounding because no baseline  
32  
33 confounding or appropriate analysis methods were used to adjust for important  
34  
35 baseline confounding. Five studies had serious bias in the selection of participants due  
36  
37 to unclear inclusion and exclusion criteria. Most of studies had low or moderate bias  
38  
39 in classification of interventions. No studies provided the information of systematic  
40  
41 differences between experimental intervention and comparator groups due to lack of  
42  
43 comparison of two intervention groups. All studies had low or moderate bias due to  
44  
45 missing data, bias in measurement of outcomes and bias in selection of the reported  
46  
47 result. Overall, 28 studies had moderate risk of bias, thirteen had serious risk of bias,  
48  
49 and one had unclear information regarding the risk of bias.  
50  
51  
52  
53  
54

### 55 ***Meta-regression of clinical outcomes***

56  
57 A meta-regression analysis demonstrated that South American countries were  
58  
59 significantly longer than the Asian, European, Australian, and North American  
60

1  
2  
3 countries for mean duration of ICU admission prior to candidemia onset (Asia as  
4 reference group, South America  $\beta = 25.83$ ,  $p = 0.0308$ ,  $R^2 = 0.097$ ). Other meta-  
5 regression analysis in subgroups did not reach statistical significance (Table 3). The  
6 level of risk of bias (moderate/serious or no information) was also included in the  
7 meta-regression analysis and the coefficient was not found to achieve statistically  
8 significant results.  
9  
10  
11  
12  
13  
14  
15  
16  
17  
18  
19  
20  
21  
22  
23  
24  
25  
26  
27  
28  
29  
30  
31  
32  
33  
34  
35  
36  
37  
38  
39  
40  
41  
42  
43  
44  
45  
46  
47  
48  
49  
50  
51  
52  
53  
54  
55  
56  
57  
58  
59  
60

For peer review only

**Table 4. Quality assessment of included studies using ROBINS-I**

| <b>1<sup>st</sup> Author (year)</b> | Bias due to confounding | Bias in selection of participants into the study | Bias in classification of interventions | Bias due to deviations from intended interventions | Bias due to missing data | Bias in measurement of outcomes | Bias in selection of the reported result | Overall risk of bias |
|-------------------------------------|-------------------------|--------------------------------------------------|-----------------------------------------|----------------------------------------------------|--------------------------|---------------------------------|------------------------------------------|----------------------|
| Ding et al. (2018)                  | low                     | moderate                                         | low                                     | no information                                     | moderate                 | low                             | low                                      | moderate             |
| Zhao et al. (2018)                  | low                     | low                                              | no information                          | no information                                     | low                      | low                             | low                                      | moderate             |
| Baldesi et al. (2017)               | low                     | moderate                                         | no information                          | no information                                     | low                      | low                             | low                                      | moderate             |
| Kawano et al. (2017)                | serious                 | moderate                                         | low                                     | no information                                     | low                      | low                             | low                                      | serious              |
| Rudramurthy et al. (2017)           | low                     | low                                              | low                                     | no information                                     | low                      | low                             | low                                      | moderate             |
| Tukenmez Tigen et al. (2017)        | serious                 | moderate                                         | low                                     | no information                                     | low                      | low                             | low                                      | serious              |
| Yang et al. (2017)                  | low                     | low                                              | low                                     | no information                                     | low                      | low                             | moderate                                 | moderate             |
| Gong et al. (2016)                  | serious                 | moderate                                         | low                                     | no information                                     | low                      | low                             | low                                      | serious              |
| OrtizRuiz et al. (2016)             | low                     | low                                              | low                                     | no information                                     | low                      | low                             | low                                      | moderate             |
| Pinhati et al. (2016)               | moderate                | moderate                                         | low                                     | no information                                     | low                      | low                             | low                                      | moderate             |
| Playford et al. (2016)              | low                     | moderate                                         | no information                          | no information                                     | low                      | low                             | low                                      | moderate             |
| Aguilar et al. (2015)               | no information          | moderate                                         | low                                     | no information                                     | low                      | low                             | low                                      | moderate             |
| Chakrabarti et al. (2015)           | serious                 | low                                              | low                                     | no information                                     | low                      | low                             | low                                      | serious              |

|    |                            |          |          |                |                |     |     |          |          |
|----|----------------------------|----------|----------|----------------|----------------|-----|-----|----------|----------|
| 1  |                            |          |          |                |                |     |     |          |          |
| 2  |                            |          |          |                |                |     |     |          |          |
| 3  |                            |          |          |                |                |     |     |          |          |
| 4  |                            |          |          |                |                |     |     |          |          |
| 5  | Fochtmann et al. (2015)    | low      | moderate | low            | no information | low | low | low      | moderate |
| 6  |                            |          |          |                |                |     |     |          |          |
| 7  |                            |          |          |                |                |     |     |          |          |
| 8  | Kautzky et al. (2015)      | serious  | low      | no information | no information | low | low | low      | serious  |
| 9  |                            |          |          |                |                |     |     |          |          |
| 10 | Klingspor et al.(2015)     | low      | moderate | low            | no information | low | low | low      | moderate |
| 11 |                            |          |          |                |                |     |     |          |          |
| 12 | Liao et al. (2015)         | low      | moderate | low            | no information | low | low | low      | moderate |
| 13 |                            |          |          |                |                |     |     |          |          |
| 14 | Karacaer et al. (2014)     | moderate | moderate | low            | no information | low | low | low      | moderate |
| 15 |                            |          |          |                |                |     |     |          |          |
| 16 | Colombo et al. (2014)      | low      | moderate | low            | no information | low | low | low      | moderate |
| 17 |                            |          |          |                |                |     |     |          |          |
| 18 | Hu et al.(2014)            | low      | moderate | low            | no information | low | low | low      | moderate |
| 19 |                            |          |          |                |                |     |     |          |          |
| 20 | Lortholary et al. (2014)   | low      | serious  | low            | no information | low | low | moderate | serious  |
| 21 |                            |          |          |                |                |     |     |          |          |
| 22 | Yapar et al. (2014)        | moderate | moderate | low            | no information | low | low | low      | moderate |
| 23 |                            |          |          |                |                |     |     |          |          |
| 24 | Giri et al. (2013)         | serious  | moderate | low            | no information | low | low | low      | serious  |
| 25 |                            |          |          |                |                |     |     |          |          |
| 26 | Guo et al.(2013)           | low      | low      | low            | no information | low | low | low      | moderate |
| 27 |                            |          |          |                |                |     |     |          |          |
| 28 | Tortorano et al.(2012)     | serious  | moderate | low            | no information | low | low | low      | serious  |
| 29 |                            |          |          |                |                |     |     |          |          |
| 30 | Ylipalosaari et al. (2012) | moderate | moderate | low            | no information | low | low | low      | moderate |
| 31 |                            |          |          |                |                |     |     |          |          |
| 32 | Pasero et al. (2011)       | low      | low      | low            | no information | low | low | low      | moderate |
| 33 |                            |          |          |                |                |     |     |          |          |
| 34 | Han et al. (2010)          | low      | serious  | no information | no information | low | low | low      | serious  |
| 35 |                            |          |          |                |                |     |     |          |          |
| 36 | Pratikaki et al. (2009)    | moderate | low      | low            | no information | low | low | low      | moderate |
| 37 |                            |          |          |                |                |     |     |          |          |
| 38 |                            |          |          |                |                |     |     |          |          |
| 39 |                            |          |          |                |                |     |     |          |          |
| 40 |                            |          |          |                |                |     |     |          |          |
| 41 |                            |          |          |                |                |     |     |          |          |
| 42 |                            |          |          |                |                |     |     |          |          |
| 43 |                            |          |          |                |                |     |     |          |          |
| 44 |                            |          |          |                |                |     |     |          |          |
| 45 |                            |          |          |                |                |     |     |          |          |
| 46 |                            |          |          |                |                |     |     |          |          |



1  
2  
3  
4  
5  
6  
7  
8  
9  
10  
11  
12  
13  
14  
15  
16  
17  
18  
19  
20  
21  
22  
23  
24  
25  
26  
27  
28  
29  
30  
31  
32  
33  
34  
35  
36  
37  
38  
39  
40  
41  
42  
43  
44  
45  
46

|                                 |                |          |                |                |          |     |     |                |
|---------------------------------|----------------|----------|----------------|----------------|----------|-----|-----|----------------|
| Playford et al.(2009)           | no information | low      | no information | no information | low      | low | low | no information |
| Holley et al.(2009)             | low            | serious  | low            | no information | low      | low | low | serious        |
| Choi et al. (2009)              | low            | serious  | low            | no information | low      | low | low | serious        |
| Yap et al. (2009)               | no information | moderate | low            | no information | low      | low | low | moderate       |
| Chow et al. (2008) <sup>a</sup> | low            | low      | low            | no information | low      | low | low | moderate       |
| Chow et al. (2008) <sup>b</sup> | low            | moderate | low            | no information | low      | low | low | moderate       |
| Bougnoux et al. (2008)          | no information | low      | low            | no information | low      | low | low | moderate       |
| Girãoet al. (2008)              | no information | serious  | low            | no information | low      | low | low | moderate       |
| Dimopoulos et al. (2008)        | low            | low      | low            | no information | low      | low | low | moderate       |
| Dimopoulos et al. (2007)        | serious        | low      | low            | no information | low      | low | low | serious        |
| Jordà-Marcos et al. (2007)      | low            | moderate | low            | no information | low      | low | low | moderate       |
| Piazza et al. (2004)            | serious        | low      | moderate       | no information | moderate | low | low | serious        |
| Michalopoulos et al. (2003)     | low            | low      | no information | no information | low      | low | low | moderate       |

<sup>a</sup>, Chow JK<sup>1</sup>, Golan Y, Ruthazer R, Karchmer AW, Carmeli Y, Lichtenberg D, Chawla V, Young J, Hadley S. Factors associated with candidemia caused by non-albicans Candida species versus Candida albicans in the intensive care unit. Clin Infect Dis. 2008 Apr 15;46(8):1206-13. doi: 10.1086/529435.

<sup>b</sup>, Chow JK<sup>1</sup>, Golan Y, Ruthazer R, Karchmer AW, Carmeli Y, Lichtenberg DA, Chawla V, Young JA, Hadley S. Risk factors for albicans and non-albicans candidemia in the intensive care unit. Crit Care Med. 2008 Jul;36(7):1993-8. doi: 10.1097/CCM.0b013e31816fc4cd.

### Publication bias

Egger's test showed potential publication bias for length of hospital stay (1-tailed  $P < 0.001$ ) and duration of ICU admission prior to candidemia onset (1-tailed  $P = 0.004$ ), and no significant publication bias for length of ICU stay (1-tailed  $P = 0.37$ ) and overall mortality (1-tailed  $P = 0.38$ ). The classic fail-safe N tests indicated that the number of missing studies which would be needed to make the P-values of the summary effect become insignificant was 65,685 for length of stay, 2,304 for ICU length of stay, 89,242 for duration of ICU admission prior to candidemia onset, and 34,263 for overall mortality. These results indicated that the significance of the observed effects of the meta-analyses would not be influenced by the inclusion of additional studies (Figure 3A-C).

### DISCUSSION

The current meta-analysis demonstrated that the pooled mean of duration of ICU admission prior to candidemia varied from approximately 17 days within hospital settings in Asia, to 19 days in Europe, to 46 days in South America. Most of the ICU patients had received broad-spectrum antibiotics (89%), and the mean duration of antibiotic therapy prior to candidemia onset was nearly 18 days. The pooled mean mortality rate was approximately 49%. There was no significant difference in length of stay or overall mortality between patients with and without *C. albicans*, but the mean length of ICU stay was greater for patients with *C. albicans* compared to those patients without *C. albicans*.

Seven studies were performed in hospitals in China (Table 1). Two studies evaluated patients with *Candida albicans* vs. non-*Candida albicans* candidemia. One study compared patients with catheter-related *Candida* bloodstream infection

(CRCBSI) vs. non-CRCBSI, and the other study compared patients with a fluconazole-resistant vs. fluconazole-sensitive (Flu-S) infection. The mean length of hospital stay ranged from 4 (early-onset group) to 54 days, and the mean length of ICU stay ranged from 14 to 34 days. The majority of studies (n=29) were performed in countries other than China [14, 25, 48-51]. Of these, 7 were case-control or cross-sectional studies, and 34 were retrospective or prospective cohort studies. Eleven were designed to compare patients with and without candidemia. Five studies compared patients with candidemia based on *C. Albicans* vs. another *Candida* strain, and only 1 study compared ICU-acquired candidemia vs. non-ICU acquired candidemia [34]. Most of the studies (n=24) were conducted in general ICUs, and the others in SICUs or in cardio-surgical/cardiothoracic ICUs (CICU) [47], or medical ICUs [36], suggesting that invasive candidiasis is a common problem in critically ill patients regardless of the type of ICU. The mean length of hospital stay ranged from 22 to 51 days, and the mean length of ICU stay ranged from 7 days to 60 days (Table 2). In 9 studies, the median length of ICU stay was  $\leq 10$  days prior to onset of IC, and the overall mortality in ICU patients with candidemia in those studies ranged from 10.6% to 65.8%. In the other studies with a median ICU length of stay  $> 10$  days prior to onset of IC, the overall mortality ranged from 13.6% to 96.0%.

The duration of ICU stay varied widely prior to candidemia onset which indicated that the onset of IC may be initiated by distinct risk factors in the ICU, and the time point to encounter these risk factors was different among critically ill patients. As we have mentioned previously, the major cause of severe candidiasis has been the endogenous colonization of *Candida* species that requires a 7 to 10-day period for the development of IC after exposure to risk factors [20]. In addition, the median time for obtaining positive blood cultures was 2–3 days (possibly up to  $\geq 7$

1  
2  
3 days) [2]. Therefore, for patients with a confirmed diagnosis of candidemia onset at 8  
4  
5 days after ICU admission, the endogenous colonization of *Candida* species may have  
6  
7 occurred in patients on the first day of ICU admission. Similarly, for the patients with  
8  
9 a confirmed diagnosis of candidemia at 12-13 days after ICU admission, the  
10  
11 endogenous colonization of *Candida* species may have also occurred 3-5 days after  
12  
13 ICU admission.  
14  
15

16  
17 The main risk factor for candidemia was systemic antibiotic use [16]. In a  
18  
19 previously reported study in pediatric ICUs, it was reported that treatment with  
20  
21 vancomycin or anti-anaerobic antibiotics for >3 days were independently associated  
22  
23 with the development of candidemia [2], but only in an unadjusted analysis [16].  
24  
25 Overuse and prolonged exposure to broad-spectrum antibiotics have been found that  
26  
27 closely associates them with candidemia in both China and India [52, 53]. Therefore,  
28  
29 it may be suggested that overuse of broad-spectrum antibiotics may be associated with  
30  
31 early-onset of candidemia after ICU admission in China. A study in Hong Kong found  
32  
33 that candidemia occurred in patients within 6 days of being admitted to the ICU, and  
34  
35 more than 97.0% of patients infected with fungi of *Candida* species had received >48  
36  
37 hours of antibiotic treatment [51]. Regardless of geographical differences, most  
38  
39 patients with IC received broad-spectrum antibiotic treatment prior to candidemia  
40  
41 onset in the ICU. However, due to a lack of sufficient data, any potential correlation  
42  
43 between prolonged exposure to broad-spectrum antibiotics and the time of candidemia  
44  
45 onset after ICU admission and the further explanation of the longer duration of ICU  
46  
47 admission prior to candidemia onset in South America than in  
48  
49 Asia/Europe/US/Australia could not be assessed in this systematic review.  
50  
51  
52  
53  
54  
55

56 The current results demonstrated that there was no significant difference in length  
57  
58 of hospital stay prior to the development of IC or overall mortality between patients  
59  
60

1  
2  
3 with and without *C. albicans* IC. This may be due to the clinical presentation and the  
4  
5 treatment of patients with candidemia caused by *C. albicans* and non-*C. albicans* were  
6  
7 indistinguishable [54]. Although it was found that the mortality rates in patients with  
8  
9 *C. albicans* and non-*C. albicans* was similar, the susceptibilities of these strains to  
10  
11 anti-fungal agents were different [21, 55, 56]..  
12  
13

14  
15 This systematic review had several limitations. This systematic review was  
16  
17 lacking a pre-specified protocol and its preliminary registration, the biased post hoc  
18  
19 decisions in review methods may occur. A number of the trials reported outcomes  
20  
21 using median (range) and/or median (IQR). In order to combine results, the sample  
22  
23 mean and standard deviation for such trials was estimated using a method proposed by  
24  
25 Wan et al. [24]. This method was based under the assumption that the data were  
26  
27 normally distributed. Across the meta-analysis, however, medians and quartiles were  
28  
29 often reported when data did not follow a normal distribution [23]. This possibility  
30  
31 may have confounded the results. The results of the quality assessment indicated that  
32  
33 potential biases from confounders may be present. High heterogeneity had existed in  
34  
35 the overall and subgroup analyses, suggesting the complexity of the risk factors  
36  
37 causing IC and candidemia (Supplementary Table S1).  
38  
39  
40  
41

42  
43 Although meta-regression analysis in different design, country, and risk of bias et  
44  
45 al, which may be find the heterogeneity between groups were assessed in this study,  
46  
47 there may still be other potential factors that explain heterogeneity that requires  
48  
49 further study. Besides the factors analyzed in the subgroup analyses, there may be  
50  
51 other factors influencing heterogeneity such as comorbidities, severity of illness, and  
52  
53 invasive procedures (e.g., hemodialysis, invasive mechanical ventilation, total  
54  
55 parenteral nutrition, surgery, and immunosuppression), which were not taken into  
56  
57 account in this analysis. Publication bias may have also possibly existed in some  
58  
59  
60

1  
2  
3 analyzed outcomes.  
4

5 This systematic review indicated that patients who received broad-spectrum  
6 antibiotics and who were admitted to the ICU were associated with the development  
7 of candidemia. Patients with *C. albicans* infection had longer ICU stays. In this  
8 setting, the choice of early detection and therapeutic intervention strategies for IC  
9 should strengthen implementation to optimize patients' management to reduce the risk  
10 of infection and potentially save the excessive consumption of medical resources.  
11  
12  
13  
14  
15  
16  
17  
18  
19  
20  
21  
22  
23

### 24 **Acknowledgements**

25  
26 The medical writing and editorial assistance were provided by Elizabeth Goodwin and  
27 Prof. Jerry Tseng of MedCom Asia Inc., China. This assistance was funded by MSD  
28 China. The authors initiated the concept for this systematic review and are responsible  
29 for the content of the manuscript.  
30  
31  
32  
33  
34

35 **Competing interests:** The authors declare that they have no competing interests  
36

37 **Funding:** None  
38

### 39 **Authors' contributions:**

40  
41  
42 ZDZ: guarantor of integrity of the entire study; study concepts; study design;  
43 definition of intellectual content; manuscript editing; manuscript review.  
44  
45

46  
47 RZ: guarantor of integrity of the entire study; study concepts; study design; definition  
48 of intellectual content; manuscript editing; manuscript review.  
49  
50

51  
52 ZGL: guarantor of integrity of the entire study; study concepts; study design;  
53 definition of intellectual content; manuscript editing; manuscript review.  
54  
55

56  
57 XCM: guarantor of integrity of the entire study; study concepts; study design;  
58 definition of intellectual content; manuscript editing; manuscript review.  
59  
60

1  
2  
3  
4  
5  
6  
7  
8  
9  
10  
11  
12  
13  
14  
15  
16  
17  
18  
19  
20  
21  
22  
23  
24  
25  
26  
27  
28  
29  
30  
31  
32  
33  
34  
35  
36  
37  
38  
39  
40  
41  
42  
43  
44  
45  
46  
47  
48  
49  
50  
51  
52  
53  
54  
55  
56  
57  
58  
59  
60

**Data sharing statement:** No unpublished data are available.

**Patient consent for publication:** Not required.

For peer review only

**REFERENCES**

1. Calandra T, Roberts JA, Antonelli M, et al. Diagnosis and management of invasive candidiasis in the ICU: an updated approach to an old enemy. *Crit Care* 2016;20:125.
2. Pappas PG, Kauffman CA, Andes DR, et al. Executive Summary: Clinical Practice Guideline for the Management of Candidiasis: 2016 Update by the Infectious Diseases Society of America. *Clin Infect Dis* 2016;62:409-17.
3. Bassetti M, Peghin M, Timsit JF. The current treatment landscape: candidiasis. *J Antimicrob Chemother*. 2016;71:ii13-ii22.
4. Yapar N. Epidemiology and risk factors for invasive candidiasis. *Ther Clin Risk Manag*. 2014;10:95-105.
5. Strollo S, Lionakis MS, Adjemian J, et al. Epidemiology of Hospitalizations Associated with Invasive Candidiasis, United States, 2002-2012. *Emerg Infect Dis*. 2016;23:7-13.
6. Leon C, Ostrosky-Zeichner L, Schuster M. What's new in the clinical and diagnostic management of invasive candidiasis in critically ill patients. *Intensive Care Med* 2014;40:808-19.
7. Yang SP, Chen YY, Hsu HS, et al. A risk factor analysis of healthcare-associated fungal infections in an intensive care unit: a retrospective cohort study. *BMC Infect Dis* 2013;13:10.
8. Montagna MT, Lovero G, Borghi E, et al. Candidemia in intensive care unit: a nationwide prospective observational survey (GISIA-3 study) and review of the European literature from 2000 through 2013. *Eur Rev Med Pharmacol Sci*. 2014;18:661-74.



- 1  
2  
3 9. Bassetti M, Garnacho-Montero J, Calandra T, et al. Intensive care medicine  
4 research agenda on invasive fungal infection in critically ill patients. *Intensive*  
5  
6 *Care Med.* 2017;43:1225-38.  
7  
8
- 9  
10 10. Clancy CJ, Nguyen MH. The end of an era in defining the optimal treatment of  
11  
12 invasive candidiasis. *Clin Infect Dis.* 2012;54:1123-5.  
13
- 14 11. Kullberg BJ, Arendrup MC. Invasive Candidiasis. *N Engl J Med.* 2016;374:794-  
15  
16 5.  
17
- 18 12. Paphitou NI, Ostrosky-Zeichner L, Rex JH. Rules for identifying patients at  
19  
20 increased risk for candidal infections in the surgical intensive care unit: an  
21  
22 approach to developing practical criteria for systematic use in antifungal  
23  
24 prophylaxis trials. *Med Mycol*2005;43:235–43  
25  
26
- 27 13. Ostrosky-Zeichner L, Sable C, Sobel J, et al. Multicenter retrospective  
28  
29 development and validation of a clinical prediction rule for  
30  
31 nosocomial invasive candidiasis in the intensive care setting. *Eur J*  
32  
33 *Clin Microbiol Infect Dis.* 2007;26:271-6.  
34  
35
- 36 14. Liao X, Qiu H, Li R, et al. Risk factors for fluconazole-resistant invasive  
37  
38 candidiasis in intensive care unit patients: An analysis from the China Survey  
39  
40 of Candidiasis study. *J Crit Care* 2015;30:862.e861-5.  
41  
42
- 43 15. Aguilar G, Delgado C, Corrales I, et al. Epidemiology of invasive candidiasis  
44  
45 in a surgical intensive care unit: an observational study. *BMC Res Notes*  
46  
47 2015;8:491.  
48  
49
- 50 16. Ortiz Ruiz G, Osorio J, Valderrama S, et al. Risk factors for candidemia in  
51  
52 non-neutropenic critical patients in Colombia. *Med Intensiva.*2016;40:139-44.  
53  
54
- 55 17. Ostrosky-Zeichner L. Clinical prediction rules for invasive candidiasis in the  
56  
57 ICU: ready for prime time? *Crit Care.* 2011;15:189.  
58  
59  
60

- 1  
2  
3 18. León C, Ruiz-Santana S, Saavedra P, et al. Contribution of Candida  
4 biomarkers and DNA detection for the diagnosis of invasive candidiasis in ICU  
5 patients with severe abdominal conditions. *Crit Care*. 2016;20:149.  
6  
7
- 8  
9  
10 19. Martín-Mazuelos E, Loza A, Castro C, et al.  $\beta$ -D-Glucan and Candida albicans  
11 germ tube antibody in ICU patients with invasive candidiasis. *Intensive Care*  
12 *Med*. 2015;41:1424-32.  
13  
14
- 15  
16  
17 20. Eggimann P, Que YA, Revelly JP, Pagani JL. Preventing invasive candida  
18 infections. Where could we do better? *J Hosp Infect*. 2015;89:302-8.  
19  
20
- 21  
22 21. Sterne JAC, Hernán MA, Reeves BC, et al. ROBINS-I: a tool for assessing risk  
23 of bias in non-randomized studies of interventions. *BMJ*. 2016; 355; i4919.  
24  
25
- 26  
27 22. Sterne JAC, Higgins JPT, Elbers RG, Reeves BC and the development group  
28 for ROBINS-I. Risk Of Bias In Non-randomized Studies of Interventions  
29 (ROBINS-I): detailed guidance, updated 12 October 2016. Available from  
30 <http://www.riskofbias.info>.  
31  
32  
33
- 34  
35 23. Zeng X, Zhang Y, Kwong JS, Zhang C, Li S, Sun F, Niu Y, Du L. The  
36 methodological quality assessment tools for preclinical and clinical studies,  
37 systematic review and meta-analysis, and clinical practice guideline: a  
38 systematic review. *J Evid Based Med*, 2015, 8(1):2-10.)  
39  
40  
41  
42  
43
- 44  
45 24. Wan X, Wang W, Liu J, Tong T. Estimating the sample mean and standard  
46 deviation from the sample size, median, range and/or interquartile range. *BMC*  
47 *Med Res Methodol*. 2014;14:135.  
48  
49  
50
- 51  
52 25. Sterne JA, Sutton AJ, Ioannidis JP, et al. Recommendations for examining and  
53 interpreting funnel plot asymmetry in meta-analyses of randomised controlled  
54 trials. *BMJ*. 2011 Jul 22;343:d4002.  
55  
56  
57  
58  
59  
60

- 1  
2  
3 26. Yang Y, Guo F, Kang Y, et al. Epidemiology, clinical characteristics, and risk  
4 factors for mortality of early- and late-onset invasive candidiasis in intensive  
5 care units in China. *Medicine (Baltimore)*. 2017;96:e7830.  
6  
7
- 8  
9  
10 27. Fochtman A, Forstner C, Haggmann M, et al. Predisposing factors for  
11 candidemia in patients with major burns. *Burns*. 2015;41:326-32.  
12  
13
- 14 28. Klingspor L, Tortorano AM, Peman J, et al. Invasive *Candida* infections in  
15 surgical patients in intensive care units: a prospective, multicentre survey  
16 initiated by the European Confederation of Medical Mycology (ECMM) (2006-  
17 2008). *Clin Microbiol Infect*. 2015;21:87.e81-7.e10.  
18  
19
- 20 29. Chakrabarti A, Sood P, Rudramurthy SM, et al. Incidence, characteristics and  
21 outcome of ICU-acquired candidemia in India. *Intensive Care  
22 Med*. 2015;41:285-95.  
23  
24
- 25 30. Gupta A, Gupta A, Varma A. *Candida glabrata* candidemia: An emerging threat  
26 in critically ill patients. *Indian J Crit Care Med*. 2015;19:151-4.  
27  
28
- 29 31. Karacaer Z, Oncul O, Turhan V, Gorenk L, Ozyurt M. A surveillance of  
30 nosocomial candida infections: epidemiology and influences on mortality in  
31 intensive care units. *Pan Afr Med J*. 2014;19:398.  
32  
33
- 34 32. Colombo AL, Guimaraes T, Sukienik T, et al. Prognostic factors and historical  
35 trends in the epidemiology of candidemia in critically ill patients: an analysis of  
36 five multicenter studies sequentially conducted over a 9-year period. *Intensive  
37 Care Med*. 2014;40:1489-98.  
38  
39
- 40 33. Tortorano AM, Dho G, Prigitano A, et al. Invasive fungal infections in the  
41 intensive care unit: a multicentre, prospective, observational study in Italy  
42 (2006-2008). *Mycoses*. 2012;55:73-9.  
43  
44  
45  
46  
47  
48  
49  
50  
51  
52  
53  
54  
55  
56  
57  
58  
59  
60

- 1  
2  
3 34. Ylipalosaari P, Ala-Kokko TI, Karhu J, et al. Comparison of the epidemiology,  
4 risk factors, outcome and degree of organ failures of patients with candidemia  
5 acquired before or during ICU treatment. Crit Care. 2012;16:R62.  
6  
7
- 8  
9  
10 35. Pasero D, De Rosa FG, Rana NK, et al. Candidemia after cardiac surgery in the  
11 intensive care unit: an observational study. Interact CardiovascThorac  
12 Surg.2011;12:374-8.  
13  
14
- 15  
16  
17 36. Han SS, Yim JJ, Yoo CG, et al. Clinical characteristics and risk factors for  
18 nosocomial candidemia in medical intensive care units: experience in a single  
19 hospital in Korea for 6.6 years. J Korean Med Sci.2010;25:671-6.  
20  
21
- 22  
23  
24 37. Pratikaki M, Platsouka E, Sotiropoulou C, et al. Epidemiology, risk factors for  
25 and outcome of candidaemia among non-neutropenic patients in a Greek  
26 intensive care unit. Mycoses.2011;54:154-61.  
27  
28
- 29  
30  
31 38. Playford EG, Lipman J, Kabir M, et al. Assessment of clinical risk predictive  
32 rules for invasive candidiasis in a prospective multicentre cohort of ICU  
33 patients. Intensive Care Med.2009;35:2141-5.  
34  
35
- 36  
37  
38 39. Holley A, Dulhunty J, Blot S, et al. Temporal trends, risk factors and outcomes  
39 in albicans and non-albicanscandidaemia: an international epidemiological  
40 study in four multidisciplinary intensive care units. Int J Antimicrob  
41 Agents.2009;33:554.e551-7.  
42  
43
- 44  
45  
46 40. Choi HK, Jeong SJ, Lee HS, et al. Blood stream infections by *Candida*  
47 *glabrata* and *Candida krusei*: A single-center experience. Korean J Intern  
48 Med. 2009;24:263-9.  
49  
50
- 51  
52  
53 41. Chow JK, Golan Y, Ruthazer R, et al. Risk factors for albicans and non-  
54 albicanscandidemia in the intensive care unit. Crit Care Med.2008;36:1993-8.  
55  
56  
57  
58  
59  
60

- 1  
2  
3  
4  
5  
6  
7  
8  
9  
10  
11  
12  
13  
14  
15  
16  
17  
18  
19  
20  
21  
22  
23  
24  
25  
26  
27  
28  
29  
30  
31  
32  
33  
34  
35  
36  
37  
38  
39  
40  
41  
42  
43  
44  
45  
46  
47  
48  
49  
50  
51  
52  
53  
54  
55  
56  
57  
58  
59  
60
42. Bougnoux ME, Kac G, Aegerter P, d'Enfert C, Fagon JY. Candidemia and candiduria in critically ill patients admitted to intensive care units in France: incidence, molecular diversity, management and outcome. *Intensive Care Med.*2008;34:292-9.
  43. Girão E, Levin AS, Basso M, et al. Seven-year trend analysis of nosocomial candidemia and antifungal (fluconazole and caspofungin) use in Intensive Care Units at a Brazilian University Hospital. *Med Mycol.*2008;46:581-8.
  44. Dimopoulos G, Ntziora F, Rachiotis G, Armaganidis A, Falagas ME. *Candida albicans* versus non-*albicans* intensive care unit-acquired bloodstream infections: differences in risk factors and outcome. *AnesthAnalg.*2008;106:523-9.
  45. Dimopoulos G, Karabinis A, Samonis G, Falagas ME. Candidemia in immunocompromised and immunocompetent critically ill patients: a prospective comparative study. *Eur J ClinMicrobiol Infect. Dis.*2007;26:377-84.
  46. Michalopoulos AS, Geroulanos S, Mentzelopoulos SD. Determinants of candidemia and candidemia-related death in cardiothoracic ICU patients. *Chest.*2003;124:2244-55.
  47. Gong X, Luan T, Wu X, et al. Invasive candidiasis in intensive care units in China: Risk factors and prognoses of *Candida albicans* and non-*albicans* *Candida* infections. *Am J Infect Control.* 2016;44:e59-63.
  48. Hu B, Du Z, Kang Y, et al. Catheter-related *Candida* bloodstream infection in intensive care unit patients: a subgroup analysis of the China-SCAN study. *BMC Infect Dis.*2014;14:594.

- 1  
2  
3 49. Guo F, Yang Y, Kang Y, et al. Invasive candidiasis in intensive care units in  
4  
5 China: a multicentre prospective observational study. *J Antimicrob*  
6  
7 *Chemother.*2013;68:1660-8.  
8  
9  
10 50. Yap HY, Kwok KM, Gomersall CD, et al. Epidemiology and outcome of  
11  
12 *Candida* bloodstream infection in an intensive care unit in Hong Kong. *Hong*  
13  
14 *Kong Med J.*2009;15:255-61.  
15  
16  
17 51. Wang J, Wang P, Wang X, Zheng Y, Xiao Y. Use and prescription of  
18  
19 antibiotics in primary health care settings in China. *JAMA Intern*  
20  
21 *Med.* 2014;174:1914-20.  
22  
23  
24 52. Agrawal C, Biswas D, Gupta A, Chauhan BS. Antibiotic overuse as a risk  
25  
26 factor for candidemia in an Indian pediatric ICU. *Indian J Pediatr.* 2015;82:530-  
27  
28 6.  
29  
30  
31 53. Cheng MF, Yang YL, Yao TJ, et al. Risk factors for fatal candidemia caused by  
32  
33 *Candida albicans* and non-*albicans Candida* species. *BMC Infect*  
34  
35 *Dis.*2005;5:22.  
36  
37  
38 54. Cheng MF, Yu KW, Tang RB, et al. Distribution and antifungal susceptibility  
39  
40 of *Candida* species causing candidemia from 1996 to 1999. *DiagnMicrobiol*  
41  
42 *Infect Dis.*2004;48:33-7.  
43  
44  
45 55. Yang YL, Ho YA, Cheng HH, Ho M, Lo HJ. Susceptibilities of *Candida*  
46  
47 species to amphotericin B and fluconazole: the emergence of fluconazole  
48  
49 resistance in *Candida tropicalis*. *Infect Control Hosp Epidemiol.*2004;25:60-4.  
50  
51  
52 56. Yang YL, Cheng HH, Lo HJ. In vitro activity of voriconazole against *Candida*  
53  
54 species isolated in Taiwan. *Int J Antimicrob Agents.*2004;24:294-6.  
55  
56  
57  
58  
59  
60

1  
2  
3  
4 **Figure legends**  
5  
6  
7

8 **Figure 1.** PRISMA flow diagram of study selection  
9

10  
11 **Figure 2.** Meta-analysis of *C. albicans* vs. non-*C. albicans* for A) length of hospital  
12  
13  
14 stay; B) ICU length of stay; and C) Overall mortality  
15  
16

17  
18 **Figure 3.** Funnel plot for A) length of hospital stay; B) ICU length of stay; C)  
19  
20 duration of ICU admission prior to candidemia onset  
21  
22  
23  
24  
25  
26  
27  
28  
29  
30  
31  
32  
33  
34  
35  
36  
37  
38  
39  
40  
41  
42  
43  
44  
45  
46  
47  
48  
49  
50  
51  
52  
53  
54  
55  
56  
57  
58  
59  
60

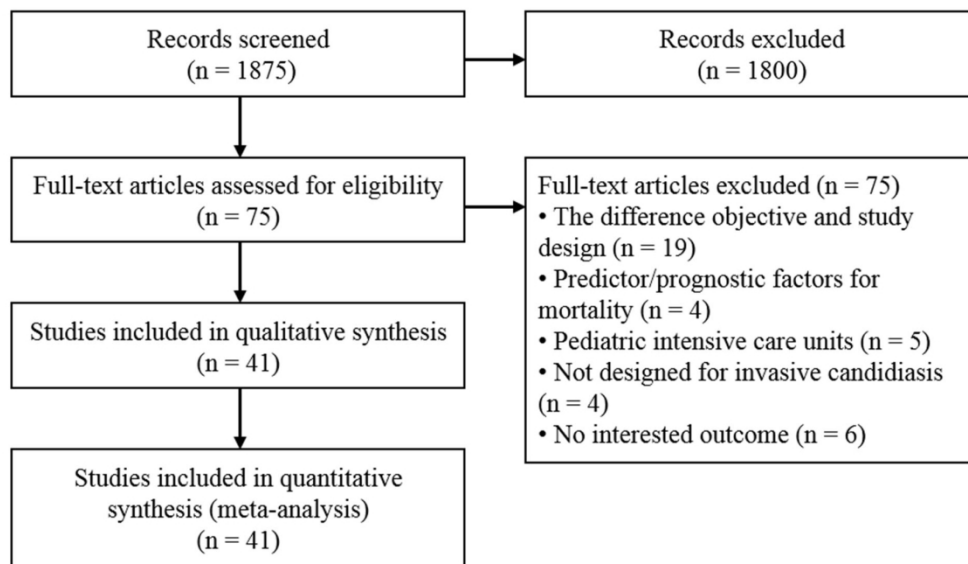

680x397mm (72 x 72 DPI)



1  
2  
3  
4  
5  
6  
7  
8  
9  
10  
11  
12  
13  
14  
15  
16  
17  
18  
19  
20  
21  
22  
23  
24  
25  
26  
27  
28  
29  
30  
31  
32  
33  
34  
35  
36  
37  
38  
39  
40  
41  
42  
43  
44  
45  
46  
47  
48  
49  
50  
51  
52  
53  
54  
55  
56  
57  
58  
59  
60

## Unable to Convert Image

The dimensions of this image (in pixels) are too large to be converted. For this image to convert, the total number of pixels (height x width) must be less than 40,000,000 (40 megapixels).

1  
2  
3  
4  
5  
6  
7  
8  
9  
10  
11  
12  
13  
14  
15  
16  
17  
18  
19  
20  
21  
22  
23  
24  
25  
26  
27  
28  
29  
30  
31  
32  
33  
34  
35  
36  
37  
38  
39  
40  
41  
42  
43  
44  
45  
46  
47  
48  
49  
50  
51  
52  
53  
54  
55  
56  
57  
58  
59  
60

Figure 3A

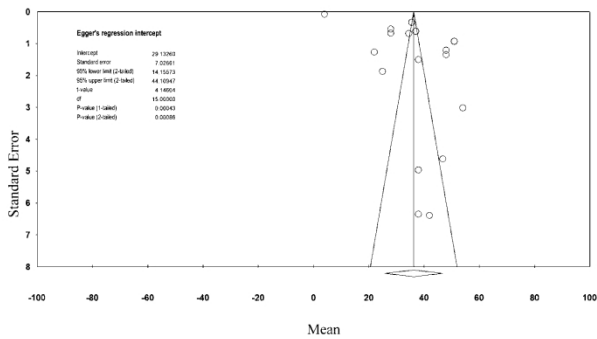

Figure 3B

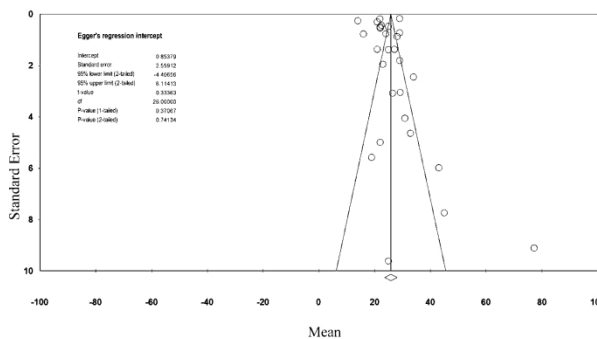

Figure 3C

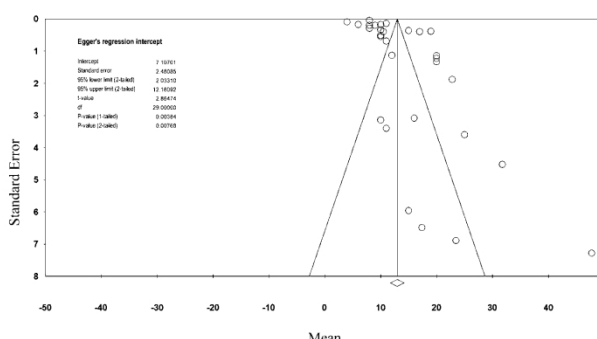

1  
2  
3  
4  
5  
6  
7  
8  
9  
10  
11  
12  
13  
14  
15  
16  
17  
18  
19  
20  
21  
22  
23  
24  
25  
26  
27  
28  
29  
30  
31  
32  
33  
34  
35  
36  
37  
38  
39  
40  
41  
42  
43  
44  
45  
46

Supplementary Table S1. A supplementary information of heterogeneity test for overall studies or given subgroup for Table 3.

| Comparison                             | Length of hospital stay, days |         |                |         | ICU length of stay, days |        |                |         | Duration of ICU admission prior to candidemia onset, days |        |                |         | Length of stay prior to ICU admission, days |       |                |         | Overall mortality rate |         |                |         |
|----------------------------------------|-------------------------------|---------|----------------|---------|--------------------------|--------|----------------|---------|-----------------------------------------------------------|--------|----------------|---------|---------------------------------------------|-------|----------------|---------|------------------------|---------|----------------|---------|
|                                        | Degrees of freedom            |         |                |         | Degrees of freedom       |        |                |         | Degrees of freedom                                        |        |                |         | Degrees of freedom                          |       |                |         | Degrees of freedom     |         |                |         |
|                                        | of                            | Q       | I <sup>2</sup> | P-value | of                       | Q      | I <sup>2</sup> | P-value | of                                                        | Q      | I <sup>2</sup> | P-value | of                                          | Q     | I <sup>2</sup> | P-value | of                     | Q       | I <sup>2</sup> | P-value |
| <b>Overall</b>                         | 16                            | 20197.0 | 99.92          | <0.001  | 27                       | 2690.9 | 99.00          | <0.001  | 30                                                        | 4686.2 | 99.36          | <0.001  | 4                                           | 311.2 | 98.71          | <0.001  | 39                     | 26981.1 | 99.86          | <0.001  |
| <b>Overall optional<sup>abcd</sup></b> | <sup>a</sup> 13               | 850.7   | 98.47          | <0.001  | <sup>b</sup> 25          | 2626.7 | 99.05          | <0.001  | <sup>c</sup> 26                                           | 2649.8 | 99.02          | <0.001  |                                             |       |                |         | <sup>d</sup> 35        | 24273.9 | 99.86          | <0.001  |
| <b>Subgroups</b>                       |                               |         |                |         |                          |        |                |         |                                                           |        |                |         |                                             |       |                |         |                        |         |                |         |
| <b>Type of study</b>                   |                               |         |                |         |                          |        |                |         |                                                           |        |                |         |                                             |       |                |         |                        |         |                |         |
| Prospective                            | 7                             | 568.3   | 98.77          | <0.001  | 12                       | 662.2  | 98.19          | <0.001  | 16                                                        | 1572.3 | 98.98          | <0.001  | 1                                           | 0.9   | 0.35           | <0.001  | 20                     | 13805.2 | 99.86          | <0.001  |
| Retrospective                          | 8                             | 14000.4 | 99.94          | <0.001  | 14                       | 893.2  | 98.43          | <0.001  | 13                                                        | 2670.7 | 99.51          | <0.001  | 2                                           | 28.39 | 92.95          | <0.001  | 18                     | 9479.2  | 99.81          | <0.001  |
| <b>Presence of neutropenia</b>         |                               |         |                |         |                          |        |                |         |                                                           |        |                |         |                                             |       |                |         |                        |         |                |         |
| Neutropenia                            | 7                             | 6119.9  | 99.89          | <0.001  | 8                        | 2297.7 | 99.65          | <0.001  | 11                                                        | 3099.9 | 99.65          | <0.001  | 0                                           | -     | -              | -       | 11                     | 15935.0 | 99.93          | <0.001  |
| Non-neutropenia                        | 1                             | 1.8     | 42.97          | 0.185   | 0                        |        |                | -       | 1                                                         | 0      | 0              | 1       | 0                                           | -     | -              | -       | 2                      | 1388.4  | 99.86          | <0.001  |
| <b>Type of ICU</b>                     |                               |         |                |         |                          |        |                |         |                                                           |        |                |         |                                             |       |                |         |                        |         |                |         |
| ICU                                    | 7                             | 11712.8 | 99.94          | <0.001  | 16                       | 930.6  | 98.28          | <0.001  | 13                                                        | 1589.8 | 99.18          | <0.001  | 1                                           | 4.14  | 75.86          | 0.042   | 23                     | 13807.9 | 99.83          | <0.001  |
| SICU                                   |                               |         |                | -       | 1                        | 0.7    | 0.00           | 0.404   | 2                                                         | 31.2   | 93.60          | <0.001  | 0                                           | -     | -              | -       | 2                      | 1005.5  | 99.80          | <0.001  |
| MICU                                   | 0                             |         |                | -       | 1                        | 6.2    | 83.92          | 0.013-  | 1                                                         | 0      | 0              | 1-      | 0                                           | -     | -              | -       | 1                      | 14.3    | 92.99          | <0.001  |
| MICU+SICU                              | 7                             | 776.9   | 99.10          | <0.001  | 6                        | 713.7  | 99.16          | <0.001  | 11                                                        | 1539.5 | 99.29          | <0.001  | 0                                           | -     | -              | -       | 10                     | 8098.2  | 99.88          | <0.001  |

**C. Albicans**

|                 |   |       |       |        |   |      |       |       |   |   |   |   |   |        |       |        |
|-----------------|---|-------|-------|--------|---|------|-------|-------|---|---|---|---|---|--------|-------|--------|
| C. Albicans     | 2 | 114.7 | 98.26 | <0.001 | 2 | 5.79 | 65.45 | 0.055 | 1 | 0 | 0 | 1 | 5 | 1558.5 | 99.68 | <0.001 |
| Non C. Albicans | 1 | 2.262 | 55.78 | 0.133  | 1 | 5.4  | 81.37 | 0.021 | 0 | - | - | - | - | -      | -     | -      |

**Presence of****IC/candidemia**

|            |    |        |       |        |    |        |       |        |    |        |       |        |   |       |       |        |    |         |       |        |
|------------|----|--------|-------|--------|----|--------|-------|--------|----|--------|-------|--------|---|-------|-------|--------|----|---------|-------|--------|
| Candidemia | 13 | 651.6  | 98.01 | <0.001 | 23 | 2620.0 | 99.12 | <0.001 | 24 | 2517.8 | 99.05 | <0.001 | 3 | 302.3 | 99.01 | <0.001 | 32 | 18755.6 | 99.83 | <0.001 |
| IC         | 2  | 2588.9 | 99.92 | <0.001 | 3  | 17.0   | 82.33 | 0.001  | 5  | 1169.4 | 99.57 | <0.001 | 0 | -     | -     | -      | 6  | 3922.9  | 99.85 | <0.001 |

**Region**

|               |   |        |       |        |    |       |       |        |    |        |       |        |   |      |       |        |    |        |       |        |
|---------------|---|--------|-------|--------|----|-------|-------|--------|----|--------|-------|--------|---|------|-------|--------|----|--------|-------|--------|
| Asia          | 8 | 5464.6 | 99.85 | <0.001 | 11 | 738.6 | 98.51 | <0.001 | 11 | 2189.9 | 99.50 | <0.001 | 1 | 1.4  | 26.82 | 0.242  | 16 | 8966.6 | 99.82 | <0.001 |
| Europe        | 3 | 226.5  | 98.68 | <0.001 | 8  | 346.7 | 97.69 | <0.001 | 10 | 907.3  | 98.90 | <0.001 | 2 | 37.9 | 94.72 | <0.001 | 13 | 7933.8 | 99.84 | <0.001 |
| South America | 0 | -      | -     | -      | 0  | -     | -     | -      | 2  | 19.6   | 89.80 | <0.001 | - | -    | -     | -      | 4  | 1960.7 | 99.80 | <0.001 |

Note: Certain subgroups have only 1 study (degree of freedom = 0).

<sup>a</sup> Excluded Yang et al. (2017), Gong et al (2016), Liao et al. (2015), and Guo et al. (2013).

<sup>b</sup> Excluded Yang et al. (2017), Gong et al (2016), Liao et al. (2015), and Guo et al. (2013).

<sup>c</sup> Excluded Yang et al. (2017), Gong et al (2016), Liao et al. (2015), and Hu et al. (2014).

<sup>d</sup> Excluded Yang et al. (2017), Gong et al (2016), Liao et al. (2015), and Hu et al. (2014).

Dash indicates no available.

1  
2  
3  
4 **ZMR060116**

5 Date of Issue: **December 2, 2019**

6  
7  
8 **CERTIFICATION**

9  
10  
11 This is to certify that a medical editor who is a native English speaker  
12  
13  
14 associated with MedCom Asia, Inc., has edited the manuscript entitled

15  
16  
17  
18 **“The risk of invasive candidiasis with prolonged duration of ICU stay and**  
19  
20  
21 **broad-spectrum antibiotic use: a systematic review and meta-analysis”**  
22

23  
24  
25  
26 This manuscript has been sent back to the author on **December 2, 2019**. If  
27  
28  
29 there is any change on the manuscript by the author after the  
30  
31  
32 above-mentioned date, this certificate is invalid. The medical editor who edited  
33  
34  
35 the manuscript has been a professional editor and writer for several years and  
36  
37  
38 is a member of American Medical Writers Association.  
39  
40

41  
42 ***MedCom Asia, Inc.***

43  
44  
45  
46  
47 5F., No. 182, Songjiang Rd., Zhongshan Dist., Taipei City 104, Taiwan (R.O.C.)

48 TEL: +886-2-25211886

49 FAX: +886-2-25211386

50 E-mail: [service@medcomasia.net](mailto:service@medcomasia.net)

51 Web: <http://www.asiamedcom.com/eng/>

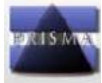

# PRISMA 2009 Checklist

| Section/Topic                      | #  | Checklist Item                                                                                                                                                                                                                                                                                              | Reported on Page # |
|------------------------------------|----|-------------------------------------------------------------------------------------------------------------------------------------------------------------------------------------------------------------------------------------------------------------------------------------------------------------|--------------------|
| <b>TITLE</b>                       |    |                                                                                                                                                                                                                                                                                                             |                    |
| Title                              | 1  | Identify the report as a systematic review, meta-analysis, or both.                                                                                                                                                                                                                                         | 1                  |
| <b>ABSTRACT</b>                    |    |                                                                                                                                                                                                                                                                                                             |                    |
| Structured summary                 | 2  | Provide a structured summary including, as applicable: background; objectives; data sources; study eligibility criteria, participants, and interventions; study appraisal and synthesis methods; results; limitations; conclusions and implications of key findings; systematic review registration number. | 2                  |
| <b>INTRODUCTION</b>                |    |                                                                                                                                                                                                                                                                                                             |                    |
| Rationale                          | 3  | Describe the rationale for the review in the context of what is already known.                                                                                                                                                                                                                              | 5                  |
| Objectives                         | 4  | Provide an explicit statement of questions being addressed with reference to participants, interventions, comparisons, outcomes, and study design (PICOS).                                                                                                                                                  | 6                  |
| <b>METHODS</b>                     |    |                                                                                                                                                                                                                                                                                                             |                    |
| Protocol and registration          | 5  | Indicate if a review protocol exists, if and where it can be accessed (e.g., Web address), and, if available, provide registration information including registration number.                                                                                                                               | N/A                |
| Eligibility criteria               | 6  | Specify study characteristics (e.g., PICOS, length of follow-up) and report characteristics (e.g., years considered, language, publication status) used as criteria for eligibility, giving rationale.                                                                                                      | 6                  |
| Information sources                | 7  | Describe all information sources (e.g., databases with dates of coverage, contact with study authors to identify additional studies) in the search and date last searched.                                                                                                                                  | 6                  |
| Search                             | 8  | Present full electronic search strategy for at least one database, including any limits used, such that it could be repeated.                                                                                                                                                                               | 6                  |
| Study selection                    | 9  | State the process for selecting studies (i.e., screening, eligibility, included in systematic review, and, if applicable, included in the meta-analysis).                                                                                                                                                   | 7                  |
| Data collection process            | 10 | Describe method of data extraction from reports (e.g., piloted forms, independently, in duplicate) and any processes for obtaining and confirming data from investigators.                                                                                                                                  | 7                  |
| Data items                         | 11 | List and define all variables for which data were sought (e.g., PICOS, funding sources) and any assumptions and simplifications made.                                                                                                                                                                       | 8                  |
| Risk of bias in individual studies | 12 | Describe methods used for assessing risk of bias of individual studies (including specification of whether this was done at the study or outcome level), and how this information is to be used in any data synthesis.                                                                                      | 7                  |
| Summary measures                   | 13 | State the principal summary measures (e.g., risk ratio, difference in means).                                                                                                                                                                                                                               | 8                  |
| Synthesis of results               | 14 | Describe the methods of handling data and combining results of studies, if done, including measures of consistency (e.g., $I^2$ ) for each meta-analysis.                                                                                                                                                   | 9                  |

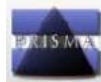

# PRISMA 2009 Checklist

| Section/Topic                 | #  | Checklist Item                                                                                                                                                                                           | Reported on Page # |
|-------------------------------|----|----------------------------------------------------------------------------------------------------------------------------------------------------------------------------------------------------------|--------------------|
| Risk of bias across studies   | 15 | Specify any assessment of risk of bias that may affect the cumulative evidence (e.g., publication bias, selective reporting within studies).                                                             | 10                 |
| Additional analyses           | 16 | Describe methods of additional analyses (e.g., sensitivity or subgroup analyses, meta-regression), if done, indicating which were pre-specified.                                                         | 8                  |
| <b>RESULTS</b>                |    |                                                                                                                                                                                                          |                    |
| Study selection               | 17 | Give numbers of studies screened, assessed for eligibility, and included in the review, with reasons for exclusions at each stage, ideally with a flow diagram.                                          | 10                 |
| Study characteristics         | 18 | For each study, present characteristics for which data were extracted (e.g., study size, PICOS, follow-up period) and provide the citations.                                                             | 10                 |
| Risk of bias within studies   | 19 | Present data on risk of bias of each study and, if available, any outcome level assessment (see item 12).                                                                                                | 34                 |
| Results of individual studies | 20 | For all outcomes considered (benefits or harms), present, for each study: (a) simple summary data for each intervention group (b) effect estimates and confidence intervals, ideally with a forest plot. | 33                 |
| Synthesis of results          | 21 | Present the main results of the review. If meta-analyses done, include for each, confidence intervals and measures of consistency.                                                                       | 28                 |
| Risk of bias across studies   | 22 | Present results of any assessment of risk of bias across studies (see Item 15).                                                                                                                          | 38                 |
| Additional analysis           | 23 | Give results of additional analyses, if done (e.g., sensitivity or subgroup analyses, meta-regression [see Item 16]).                                                                                    | 34                 |
| <b>DISCUSSION</b>             |    |                                                                                                                                                                                                          |                    |
| Summary of evidence           | 24 | Summarize the main findings including the strength of evidence for each main outcome; consider their relevance to key groups (e.g., healthcare providers, users, and policy makers).                     | 38                 |
| Limitations                   | 25 | Discuss limitations at study and outcome level (e.g., risk of bias), and at review-level (e.g., incomplete retrieval of identified research, reporting bias).                                            | 41                 |
| Conclusions                   | 26 | Provide a general interpretation of the results in the context of other evidence, and implications for future research.                                                                                  | 41                 |
| <b>FUNDING</b>                |    |                                                                                                                                                                                                          |                    |
| Funding                       | 27 | Describe sources of funding for the systematic review and other support (e.g., supply of data); role of funders for the systematic review.                                                               | 42                 |

From: Moher D, Liberati A, Tetzlaff J, Altman DG, The PRISMA Group (2009). Preferred Reporting Items for Systematic Reviews and Meta-Analyses: The PRISMA Statement. PLoS Med 6(6): e1000097. doi:10.1371/journal.pmed1000097

For more information, visit: [www.prisma-statement.org](http://www.prisma-statement.org).

# BMJ Open

## The risk of invasive candidiasis with prolonged duration of ICU stay and broad-spectrum antibiotic use: a systematic review and meta-analysis

|                                 |                                                                                                                                                                                                                                                                                                                                                                                                                      |
|---------------------------------|----------------------------------------------------------------------------------------------------------------------------------------------------------------------------------------------------------------------------------------------------------------------------------------------------------------------------------------------------------------------------------------------------------------------|
| Journal:                        | <i>BMJ Open</i>                                                                                                                                                                                                                                                                                                                                                                                                      |
| Manuscript ID                   | bmjopen-2019-036452.R1                                                                                                                                                                                                                                                                                                                                                                                               |
| Article Type:                   | Original research                                                                                                                                                                                                                                                                                                                                                                                                    |
| Date Submitted by the Author:   | 17-Feb-2020                                                                                                                                                                                                                                                                                                                                                                                                          |
| Complete List of Authors:       | Zhang, Zhidan; the First Hospital of China Medical University, Department of Critical Care Medicine<br>Zhu, Ran; the First Hospital of China Medical University, Department of Critical Care Medicine<br>Luan, Zhenggang; the First Hospital of China Medical University, Department of Critical Care Medicine<br>Ma, Xiaochun; the First Hospital of China Medical University, Department of Critical Care Medicine |
| <b>Primary Subject Heading</b>: | Intensive care                                                                                                                                                                                                                                                                                                                                                                                                       |
| Secondary Subject Heading:      | Intensive care                                                                                                                                                                                                                                                                                                                                                                                                       |
| Keywords:                       | ACCIDENT & EMERGENCY MEDICINE, INTENSIVE & CRITICAL CARE, Adult intensive & critical care < ANAESTHETICS                                                                                                                                                                                                                                                                                                             |
|                                 |                                                                                                                                                                                                                                                                                                                                                                                                                      |

SCHOLARONE™  
Manuscripts





I, the Submitting Author has the right to grant and does grant on behalf of all authors of the Work (as defined in the below author licence), an exclusive licence and/or a non-exclusive licence for contributions from authors who are: i) UK Crown employees; ii) where BMJ has agreed a CC-BY licence shall apply, and/or iii) in accordance with the terms applicable for US Federal Government officers or employees acting as part of their official duties; on a worldwide, perpetual, irrevocable, royalty-free basis to BMJ Publishing Group Ltd ("BMJ") its licensees and where the relevant Journal is co-owned by BMJ to the co-owners of the Journal, to publish the Work in this journal and any other BMJ products and to exploit all rights, as set out in our [licence](#).

The Submitting Author accepts and understands that any supply made under these terms is made by BMJ to the Submitting Author unless you are acting as an employee on behalf of your employer or a postgraduate student of an affiliated institution which is paying any applicable article publishing charge ("APC") for Open Access articles. Where the Submitting Author wishes to make the Work available on an Open Access basis (and intends to pay the relevant APC), the terms of reuse of such Open Access shall be governed by a Creative Commons licence – details of these licences and which [Creative Commons](#) licence will apply to this Work are set out in our licence referred to above.

Other than as permitted in any relevant BMJ Author's Self Archiving Policies, I confirm this Work has not been accepted for publication elsewhere, is not being considered for publication elsewhere and does not duplicate material already published. I confirm all authors consent to publication of this Work and authorise the granting of this licence.

1  
2  
3 **The risk of invasive candidiasis with prolonged duration of ICU stay and**  
4 **broad-spectrum antibiotic use: a systematic review and meta-analysis**  
5  
6  
7  
8  
9  
10

11 **Running title:** Duration of ICU prior to candidemia  
12

13  
14 Zhidan Zhang MD, Ran Zhu MD, Zhenggang Luan MD, Xiaochun Ma MD  
15

16  
17 Department of Critical Care Medicine, the First Hospital of China Medical University,  
18  
19 Shenyang 110001, Liaoning, China  
20  
21

22  
23  
24  
25 **Corresponding author:** Xiaochun Ma  
26

27  
28 Department of Critical Care Medicine, the First Hospital of China Medical University,  
29  
30 Shenyang 110001, Liaoning, China  
31  
32

33  
34 Tel: 008613840192939;  
35

36  
37 E-mail: XCMA2972@sina.com  
38  
39  
40  
41  
42  
43  
44  
45  
46  
47  
48  
49  
50  
51  
52  
53  
54  
55  
56  
57  
58  
59  
60

## ABSTRACT

**Objective:** This study aimed to evaluate the duration of intensive care unit (ICU) stay prior to onset of invasive candidiasis (IC)/candidemia.

**Design:** Systematic review and meta-analysis.

**Data Sources:** Pubmed, Cochrane, Embase, and Web of Science databases were searched through June, 2019 to identify the relevant studies.

**Eligibility Criteria:** Adult patients who had been admitted to the ICU and developed an invasive candidiasis infection.

**Data extraction and synthesis:** The following data were extracted from each article: ICU length of stay in hospital, length of stay prior to ICU admission, duration of ICU stay prior to candidemia onset, antibiotic therapy prior to candidemia onset, duration of antibiotic therapy prior to candidemia onset, and overall mortality. In addition to traditional meta-analyses, meta-regression was also used to explore possible mediators that might further explain heterogeneity.

**Results:** The mean age of patients ranged from 28 to 76 years across studies. The pooled mean duration of ICU stay before the onset of candidemia was 12.9 days (95% confidence interval [CI]: 11.7 – 14.2). The pooled mean duration of ICU admission prior to the onset of candidemia ranged from 4 to 47 days. The pooled mean duration of hospital stay was 36.3±5.3 days (95% CI: 25.8 – 46.7) and the pooled mean mortality rate was 49.3±2.2% (95% CI: 45.0% – 53.5%). There was no significant difference in duration of hospital stay ( $P = 0.528$ ) or overall mortality ( $P=0.111$ ) between patients with or without *C. albicans*, yet a significant difference was demonstrated in mean length of ICU stay (2.8 days,  $P < 0.001$ ). The meta-regression

1  
2  
3 analysis found that South American countries had significantly longer mean duration  
4 of ICU admission prior to candidemia onset compared with Asian, European,  
5  
6 Australian, and North American countries.  
7  
8  
9

10 **Conclusions:** Patients with IC are possibly associated with the use of broad-spectrum  
11 antibiotics and length of ICU stay, with the shortest duration of IC onset in Asia. Thus,  
12 the current findings demonstrate that a more proactive strategy for the diagnosis of IC  
13  
14 should be considered in these patients, especially relevant for Asian physicians.  
15  
16  
17  
18  
19  
20  
21

22 **KEYWORDS:** Invasive candidiasis, candidemia, intensive care unit, length of stay,  
23 antibiotic, mortality  
24  
25  
26  
27  
28  
29  
30  
31  
32  
33  
34  
35  
36  
37  
38  
39  
40  
41  
42  
43  
44  
45  
46  
47  
48  
49  
50  
51  
52  
53  
54  
55  
56  
57  
58  
59  
60

### Strengths and limitations of this study

- This meta-analysis is one of few that investigated the association of IC with the length of ICU stay, using data published worldwide and adhering to the PRISMA guideline.
- Extensive subgroup analyses were performed and meta-regression was made to examine possible causes of heterogeneity in the results.
- Although this meta-analysis was performed methodically, it lacked a pre-specified protocol and preliminary registration.
- Heterogeneity exists in some subgroup and overall analyses.
- Due to a lack of sufficient published data, relationship between prolonged exposure to broad-spectrum antibiotics and ICU-acquired candidemia could not be assessed.

## INTRODUCTION

*Candida* species account for 70% to 90% of invasive fungal infections and are the most frequent cause of fungal infections in patients admitted to the intensive care unit (ICU) [1]. Invasive candidiasis (IC) is associated with a high mortality rate (range: 40% to 60%) [1, 2]. Over recent decades, the incidence of IC has been gradually increasing in most regions [3], ranging from 0.5 to 32 cases per 1,000 ICU admissions. It has been found that there is a significant difference in the incidence of IC among several countries in Latin America and North America; however, data from Asia-Pacific countries are still relatively rare [4]. Candidemia has been described as the most common manifestation of IC, and the further infection of the liver, spleen, heart valves, or eye might also occur after a bloodstream infection [5]. In the past, the main *Candida* species isolated from patients with IC was *C. albicans*. However, non-*C. albicans* species has seen a rising proportion and now account for approximately 50% of all cases of IC in the past two decades [1,6-8].

Diagnosis and management of IC remains challenging for physicians in the ICU [1, 2]. The early initiation of empiric antifungal treatment has been demonstrated to improve the prognosis of invasive candidiasis [2, 9]. However, there is difficulty in the diagnosis of IC which can delay timely antifungal treatment [2, 10]. Blood culture remains the gold standard for the diagnosis of invasive candidiasis, but its sensitivity is variable (21% to 71%) [11].

In order to improve the diagnosis of IC, and to identify the patients who may best benefit from prophylactic, preemptive, or empirical therapy prior to, or at an early stage of ICU admission several methods in predicting the development of IC based on their associated risk factors have been developed [12, 13]. The risk factors in the

1  
2  
3 various predictive models include broad-spectrum antibiotic use, central venous  
4 catheter placement, total parenteral nutrition, hemodialysis (days 1–3 in the ICU), any  
5 surgery, immunosuppressive use, pancreatitis prior to ICU admission, and steroid use.  
6  
7 However, different risk factors are included in the different predictive models. In  
8 addition, potential risk factors such as *Candida* colonization [14] and mechanical  
9 ventilation [15] have not been included in these models.  
10  
11  
12  
13  
14  
15

16  
17 Long-term ICU stay has been reported as a risk factor for IC [11, 14-16]. Only a  
18 few studies have examined the interval between ICU admission or initiation of  
19 broad-spectrum antibiotics and the diagnosis of IC. However, the specific duration of  
20 long-term ICU stays and the prolonged use of broad-spectrum antibiotics are often  
21 arbitrarily defined and inconsistent among studies [6, 12, 15, 17-19]. Furthermore, a  
22 large majority of severe candidiasis cases are caused by endogenous colonization.  
23 This may be the primary reason for causing a delay of 7 to 10 days between exposure  
24 to risk factors and the development of IC [20].  
25  
26  
27  
28  
29  
30  
31  
32  
33  
34

35 Thus, the objective of this systematic review was to evaluate the risk factors  
36 associated with the development of candidemia, specifically the length of ICU stay  
37 and the use of broad-spectrum antibiotics.  
38  
39  
40  
41  
42  
43  
44

## 45 **METHODS**

### 46 **Search strategy**

47  
48 The study was performed in accordance with guidance from the Preferred  
49 Reporting Items for Systematic Reviews and Meta-Analyses (PRISMA). PubMed,  
50 Cochrane, Embase, and Web of Science databases were searched through June, 2019  
51 using the following terms: invasive candidiasis, critical care, critical illness, risk  
52 factors, candidemia, and antibiotic agents. Studies identified by the search strategy  
53  
54  
55  
56  
57  
58  
59  
60

1  
2  
3 were reviewed for inclusion and data were extracted by two independent reviewers.  
4  
5 Where there was uncertainty regarding study eligibility, a third reviewer was  
6  
7 consulted. A flow chart of the study selection is shown in Figure 1.  
8  
9  
10  
11

## 12 **Study selection criteria and data extraction**

13  
14 Randomized controlled trials (RCTs), cohort studies, case-controlled, and  
15  
16 cross-sectional studies were included. All studies included adult patients who were  
17  
18 critically ill, who had been admitted to the ICU, and who were tested positive for  
19  
20 *Candida* species using blood culture analyses. Studies had to have reported  
21  
22 quantitative outcomes of interest and no author was contacted. Letters, comments,  
23  
24 editorials, case reports, proceedings, personal communications, and case series were  
25  
26 excluded. Studies in which patients were diagnosed with candidiasis prior to ICU  
27  
28 admission were excluded. Studies that did not evaluate the incidence of candidiasis as  
29  
30 a primary objective, or that were not designed to evaluate risk factors/prognostic  
31  
32 factors of patients with candidiasis were also excluded.  
33  
34  
35  
36

37  
38 The following information / data was extracted from studies that met the  
39  
40 inclusion criteria: the name of the first author, year of publication, country, study  
41  
42 design, type of ICU, number of participants in each group, participants' age and  
43  
44 gender, the presence of *C. albicans*, the presence of neutropenia, and antifungal  
45  
46 treatment (especially the use of broad-spectrum antibiotics). The following data were  
47  
48 also extracted from each article: length of stay in hospital/ICU, length of stay prior to  
49  
50 ICU admission, duration of ICU stay prior to candidemia onset, antibiotic therapy  
51  
52 prior to candidemia onset, duration of antibiotic therapy prior to candidemia onset,  
53  
54 and overall mortality.  
55  
56  
57  
58  
59  
60



## Quality assessment

We used the Risk of Bias In Non-randomized Studies of Interventions (ROBINS-I) tool to assess the quality of the included studies [21]. ROBINS-I is based on the Cochrane RoB tool and is suited for evaluating non-randomized studies that compare the health effects of different interventions. ROBINS-I covers 7 different bias domains: bias due to confounding, bias in selection of participants into the study, bias in classification of interventions, bias due to deviations from intended interventions, bias due to missing data, bias in measurement of outcomes, and bias in the selection of reported results [22-23]. In this systematic review, 2 independent reviewers performed the quality assessment, with a third reviewer consulted for any uncertainties.

## Patient and public involvement

Since no patients and/or members of the public were involved in the process of designing, planning and completing this study, ethical approval, informed consent, and institutional review board's review were not required.

## Statistical analysis

Study characteristics were summarized as mean $\pm$ standard deviations (SD), mean (range), median (range), or median (IQR) for age or duration of antifungal treatment; and percentage (%) for sex, rate of *C. albicans* isolated, neutropenia, and antifungal treatment used in each study.

Clinical outcomes, including hospital stay, ICU length of stay, length of stay prior to ICU admission, duration of ICU admission prior to candidemia onset, and duration of antibiotic therapy prior to candidemia onset were represented as mean

1  
2  
3 (range: [min. – max.]), median (range), or median (IQR [interquartile range: 1<sup>st</sup> – 3<sup>rd</sup>  
4 quartiles]). The rate of antibiotic therapy prior to candidemia onset and overall  
5 mortality rate were presented as a percentage (%), according to the data extracted  
6 from the study. All the clinical outcomes were further summarized for overall studies,  
7 or subgroups of studies (with studies' number  $\geq 2$ ) given type of study, presence of  
8 neutropenia, type of ICU, type of *Candida* isolated, presence of IC/candidemia, and  
9 region/country, and meta-regression analyses were further used to investigate  
10 statistical importance of the potential moderators. Before summarizing, studies that  
11 reported quantitative data with median (range) and/or median interquartile range (IQR)  
12 were transformed into mean  $\pm$  SD according to Wan et al. [24]  
13  
14  
15  
16  
17  
18  
19  
20  
21  
22  
23  
24  
25

26  
27 The outcomes selected for the analysis were length of hospital stay, ICU length  
28 of stay, duration of ICU admission prior to candidemia onset, and overall mortality  
29 compared between subgroups, *C. albicans* and non-*C. albicans*. The effect size was  
30 calculated as mean difference with 95% CI (Lower, Upper limit) and significance of  
31 *p*-values in length of days, or rate ratio with 95% CI and *p*-values in overall mortality  
32 for each given study, and then a pooling effect was derived thereafter. A difference in  
33 means of length days  $< 0$  (or rate ratio of overall mortality rate  $> 1$ ) indicated the  
34 pooling effect favored non- *C. albicans* subgroup, whereas difference in means of  
35 length days  $> 0$  (or rate ratio of overall mortality rate  $< 1$ ) indicated the pooling effect  
36 favored *C. albicans* subgroup. A difference in means of length days = 0 (or rate ratio  
37 of overall mortality rate = 1) indicated the pooling effect was similar between *C.*  
38 *albicans* and non-*C. albicans* subgroups. Heterogeneity was evaluated using a  
39  $\chi^2$ -based Cochran's Q statistic and  $I^2$ , that the random effect model  
40 (DerSimonian-Laird method) and meta-regression analyses with potential moderators  
41 were considered for the meta-analysis if either Q statistic with P values  $< 0.10$  or  
42  
43  
44  
45  
46  
47  
48  
49  
50  
51  
52  
53  
54  
55  
56  
57  
58  
59  
60

1  
2  
3  $I^2 > 50\%$  were derived; otherwise, a fixed effect model (Mantel-Haenszel method) was  
4 considered for the meta-analysis. For the Q statistic, P values  $< 0.10$  were considered  
5 statistically significant for heterogeneity. For the  $I^2$  statistic, heterogeneity was  
6 assessed as follows: no heterogeneity ( $I^2 = 0 - 25\%$ ), moderate heterogeneity ( $I^2 = 25 -$   
7  $50\%$ ), large heterogeneity ( $I^2 = 50 - 75\%$ ), and extreme heterogeneity ( $I^2 = 75 - 100\%$ ).  
8 A two-sided P value of  $< 0.05$  was considered significant.  
9

10  
11  
12  
13  
14  
15  
16  
17 Countries were grouped based on their continents, but since meta-analysis of this  
18 particular topic has not yet been seen in China, research from China will be separately  
19 examined and discussed.  
20  
21  
22

23  
24 The publication bias was assessed using the funnel plot with Egger's test and  
25 Classical fail-safe N test for all enrolled studies (except for subgroups). The absence  
26 of publication bias was indicated by the data points forming a symmetric  
27 funnel-shaped distribution and a 1-tailed significance level of  $P > 0.05$  in an Egger's  
28 test.[25] All analyses were performed using Comprehensive Meta-Analysis statistical  
29 software, version 3.3.070 (Biostat, Englewood, NJ, USA).  
30  
31  
32  
33  
34  
35  
36  
37  
38  
39

## 40 RESULTS

### 41 Literature search results

42  
43  
44 A total of 1875 articles were retrieved by the primary search, and 1800 articles were  
45 excluded after the title and abstract were screened based on the inclusion/exclusion  
46 criteria (Figure 1). Seventy-five articles underwent full-text review, and 34 articles  
47 were excluded for having irrelevant objectives or study designs ( $n=19$ ), containing  
48 patients in neonatal or pediatric intensive care unit ( $n=5$ ), not designed for invasive  
49 candidiasis ( $n=4$ ), and not reporting outcomes of interest ( $n=6$ ). Thus, 41 articles were  
50 included in the systematic review and meta-analysis.  
51  
52  
53  
54  
55  
56  
57  
58  
59  
60

## Study characteristics

The characteristics of the 41 studies are summarized in Table 1 and Table 2 [14-16, 26, 27-29, 30-63]. A total of 10,692 patients were included across the studies, with the number of patients in each study ranging from 12 to 1,400. The mean age of the patients ranged from 28 to 76 years. Majority of the patients were males (range: 20% to 75.9%). These studies were conducted in different countries: 19 in Europe, 14 in Asia, 1 in the US, 4 in South America, 2 in Australia and 1 multinational study (Australia, Belgium, Greece, Brazil).

Table 1. Characteristics of studies included in this systematic review

| Studies<br>1 <sup>st</sup> Author<br>(year) | Country | Study<br>design                                       | Type of ICU | Total<br>IC and<br>Candidemia<br>number of<br>patients | No. of<br>patients | Age<br>(years)           | Male<br>(%) | <i>C.Albica</i><br><i>ns</i><br>isolated<br>(%) | Neutropen<br>ia (%) | Antifungal treatment        |                                                                                                                                                                  |
|---------------------------------------------|---------|-------------------------------------------------------|-------------|--------------------------------------------------------|--------------------|--------------------------|-------------|-------------------------------------------------|---------------------|-----------------------------|------------------------------------------------------------------------------------------------------------------------------------------------------------------|
|                                             |         |                                                       |             |                                                        |                    |                          |             |                                                 |                     | Duration<br>of<br>treatment | Antifungal treatment used                                                                                                                                        |
| Zhao H (2018)<br>[51]                       | China   | retrospective<br>cohort                               | ICU         | Candidemia                                             | 95                 | 69.3±16.5                | 57.9<br>%   | 59                                              | —                   | —                           | 17.90%                                                                                                                                                           |
| Ding R (2018)<br>[52]                       | China   | retrospective<br>cohort                               | ICU         | Candidemia                                             | 72                 | 62.5<br>(49.8,<br>77.0)§ | 62.5<br>%   | 15                                              | —                   | —                           | Fluconazole 30.6%<br>Voriconazole 9.7%<br>Echinocandin 44.4%                                                                                                     |
| Yang et al.<br>(2017) [26]                  | China   | Retrospectiv<br>e cohort<br>study<br>(China-SCA<br>N) | ICU         | Early-onset IC                                         | 105                | 56.9<br>(19.9)§          | 64.8<br>%   | 47.7                                            | 1.9%                | —                           | Fluconazole (39.3%)<br>Caspofungin(21.3%)<br>Voriconazole (19.1%)<br>Micafungin(10.1%)<br>Itraconazole(5.6%)<br>Amphotericin B (3.4%)<br>Combined therapy (1.1%) |
|                                             |         |                                                       |             | Late-onset IC                                          | 201                | 64.0<br>(19.7)§          | 70.6<br>%   | 36.1                                            | 1.5%                | —                           | Fluconazole (36.9%)<br>Caspofungin(25.1%)<br>Voriconazole (17.9%)<br>Micafungin(7.8%)<br>Itraconazole(9.5%)<br>Amphotericin B (1.7%)<br>Combined therapy (1.1%)  |



1  
2  
3  
4  
5  
6  
7  
8  
9  
10  
11  
12  
13  
14  
15  
16  
17  
18  
19  
20  
21  
22  
23  
24  
25  
26  
27  
28  
29  
30  
31  
32  
33  
34  
35  
36  
37  
38  
39  
40  
41  
42  
43  
44  
45  
46

|                             |           |                                        |                            |       |                                                      |      |                  |        |      |      |                    |                                                             |
|-----------------------------|-----------|----------------------------------------|----------------------------|-------|------------------------------------------------------|------|------------------|--------|------|------|--------------------|-------------------------------------------------------------|
| Gong et al. (2016) [47]     | China     | Prospective, cohort study (China-SCAN) | MICU, SICU, Integrated ICU | 306   | Candidemia ( <i>C. albicans</i> )                    | 98   | 62.2±17.3        | 62.2 % | 100  | 3.1% | 12.85 days         | Triazole (64.7%)<br>Echinocandin (31.8%)<br>Polyenes (0%)   |
|                             |           |                                        |                            |       | Candidemia (Non- <i>C. albicans</i> )                | 146  | 61.4±21.4        | 72.6 % | —    | 1.4% | 20.4 days          | Triazole (62.8%)<br>Echinocandin (34.1%)<br>Polyenes (2.3%) |
| Playford EG (2016) [57]     | Australia | prospective cohort                     | MICU, SICU                 | 6,714 | ICU-acquired IC                                      | 96   | —                | —      | 66   | —    | —                  | —                                                           |
|                             |           |                                        |                            |       | Control (no IC)                                      | 6618 | —                | —      | —    | —    | —                  | —                                                           |
| Pinhati HM (2016) [58]      | Brazil    | cross-sectional                        | ICU                        | 40    | fluconazole-resistant <i>C. parapsilosis</i> (FRCP)  | 21   | 70 (23 - 91)†    | 66.7 % | —    | —    | —                  | any: (33.3)<br>fluconazole: (19.0)                          |
|                             |           |                                        |                            |       | fluconazole-susceptible <i>Candida</i> species (FSC) | 19   | 76 (35 - 90)†    | 57.9 % | —    | —    | —                  | any: (15.8)<br>fluconazole: (15.8)                          |
| Aguilar et al. (2015) [15]  | Spain     | Prospective cohort study               | SICU                       | 22    | IC                                                   | 22   | 66 (53.7-74.2) § | 72.7 % | 59.1 | —    | 10 (5.0-16.5) days | Echinocandins (86.4%)<br>Fluconazole (13.6%)                |
| Fochtman et al. (2015) [27] | Austria   | Retrospective cohort study             | Burn ICU                   | 174   | Candidemia                                           | 20   | 39 (17-88) †     | 60%    | 60   | —    | —                  | Triazoles (70%)                                             |
|                             |           |                                        |                            |       | Control                                              | 154  | 58 (17-94) †     | 61%    | —    | —    | —                  | Echinocandins (30%)                                         |

|    |                                |                        |                                       |                     |           |                                        |      |             |       |      |      |              |                                                                                               |
|----|--------------------------------|------------------------|---------------------------------------|---------------------|-----------|----------------------------------------|------|-------------|-------|------|------|--------------|-----------------------------------------------------------------------------------------------|
| 1  |                                |                        |                                       |                     |           |                                        |      |             |       |      |      |              |                                                                                               |
| 2  |                                |                        |                                       |                     |           |                                        |      |             |       |      |      |              |                                                                                               |
| 3  |                                |                        |                                       |                     |           |                                        |      |             |       |      |      |              |                                                                                               |
| 4  |                                |                        |                                       |                     |           |                                        |      |             |       |      |      |              |                                                                                               |
| 5  | Klingsporet al.(2015) [28]     | 14 countries in Europe | Prospective cohort study              | SICU                | 807       | IC                                     | 779  | 63(0–91)†   | 62.5% | 54   | —    | —            | Fluconazole (60%)<br>Caspofungin (18.7%)<br>Amphotericin B (13%)<br>Voriconazole (4.8%)       |
| 6  |                                |                        |                                       |                     |           |                                        |      |             |       |      |      |              |                                                                                               |
| 7  |                                |                        |                                       |                     |           |                                        |      |             |       |      |      |              |                                                                                               |
| 8  |                                |                        |                                       |                     |           |                                        |      |             |       |      |      |              |                                                                                               |
| 9  |                                |                        |                                       |                     |           |                                        |      |             |       |      |      |              |                                                                                               |
| 10 | Chakrabarti et al. (2015) [29] | India                  | Prospective cohort study              | MICU, SICU          | 1400      | Candidemia                             | 1400 | 49.7 ± 17.7 | —     | 20.9 | 1.3% | 9.0 (5-15)§  | Azoles (72.0%)<br>Echinocandins (18.3%)<br>Amphotericin B (14.4%)                             |
| 11 |                                |                        |                                       |                     |           |                                        |      |             |       |      |      |              |                                                                                               |
| 12 |                                |                        |                                       |                     |           |                                        |      |             |       |      |      |              |                                                                                               |
| 13 |                                |                        |                                       |                     |           |                                        |      |             |       |      |      |              |                                                                                               |
| 14 | Liao et al. (2015) [14]        | China                  | Prospective cohort study (China-SCAN) | MICU, SICU, Mix ICU | 306       | Flu-S                                  | 129  | 62.4±19.5   | 68.2% | 60.5 | 3.1% | —            | Monoantifungaltherapy (64.5%)<br>Fungal drug adjustment (35.7%)<br>Completely improved(34.6%) |
| 15 |                                |                        |                                       |                     |           |                                        |      |             |       |      |      |              |                                                                                               |
| 16 |                                |                        |                                       |                     |           |                                        |      |             |       |      |      |              |                                                                                               |
| 17 |                                |                        |                                       |                     |           |                                        |      |             |       |      |      |              |                                                                                               |
| 18 |                                |                        |                                       |                     |           |                                        |      |             |       |      |      |              |                                                                                               |
| 19 |                                |                        |                                       |                     |           |                                        |      |             |       |      |      |              |                                                                                               |
| 20 |                                |                        |                                       |                     |           |                                        |      |             |       |      |      |              |                                                                                               |
| 21 |                                |                        |                                       |                     |           |                                        |      |             |       |      |      |              |                                                                                               |
| 22 |                                |                        |                                       |                     |           |                                        |      |             |       |      |      |              |                                                                                               |
| 23 |                                |                        |                                       |                     |           |                                        |      |             |       |      |      |              |                                                                                               |
| 24 |                                |                        |                                       |                     |           |                                        |      |             |       |      |      |              |                                                                                               |
| 25 |                                |                        |                                       |                     |           |                                        |      |             |       |      |      |              |                                                                                               |
| 26 |                                |                        |                                       |                     |           |                                        |      |             |       |      |      |              |                                                                                               |
| 27 | Kautzky S (2015) [59]          | Austria                | prospective cohort                    | MICU                | 65        | IC (invasive <i>Candida</i> infection) | 5    | 28.2 ± 97   | 20%   | —    | 0%   | 15.40 ± 13.9 | 100%                                                                                          |
| 28 |                                |                        |                                       |                     |           |                                        |      |             |       |      |      |              |                                                                                               |
| 29 |                                |                        |                                       |                     |           |                                        |      |             |       |      |      |              |                                                                                               |
| 30 |                                |                        |                                       |                     |           |                                        |      |             |       |      |      |              |                                                                                               |
| 31 |                                |                        |                                       |                     |           |                                        |      |             |       |      |      |              |                                                                                               |
| 32 |                                |                        |                                       |                     |           |                                        |      |             |       |      |      |              |                                                                                               |
| 33 |                                |                        |                                       |                     |           |                                        |      |             |       |      |      |              |                                                                                               |
| 34 |                                |                        |                                       |                     |           |                                        |      |             |       |      |      |              |                                                                                               |
| 35 |                                |                        |                                       |                     |           |                                        |      |             |       |      |      |              |                                                                                               |
| 36 |                                |                        |                                       |                     |           |                                        |      |             |       |      |      |              |                                                                                               |
| 37 | Karacaer et al. (2014) [31]    | Turkey                 | Prospective cohort study              | ICU service         | burn 2362 | IC                                     | 63   | 70.2 ± 19.5 | 54%   | 64   | —    | —            | —                                                                                             |
| 38 |                                |                        |                                       |                     |           |                                        |      |             |       |      |      |              |                                                                                               |
| 39 |                                |                        |                                       |                     |           |                                        |      |             |       |      |      |              |                                                                                               |
| 40 |                                |                        |                                       |                     |           |                                        |      |             |       |      |      |              |                                                                                               |
| 41 |                                |                        |                                       |                     |           |                                        |      |             |       |      |      |              |                                                                                               |
| 42 |                                |                        |                                       |                     |           |                                        |      |             |       |      |      |              |                                                                                               |
| 43 |                                |                        |                                       |                     |           |                                        |      |             |       |      |      |              |                                                                                               |
| 44 |                                |                        |                                       |                     |           |                                        |      |             |       |      |      |              |                                                                                               |
| 45 |                                |                        |                                       |                     |           |                                        |      |             |       |      |      |              |                                                                                               |
| 46 |                                |                        |                                       |                     |           |                                        |      |             |       |      |      |              |                                                                                               |



1  
2  
3  
4  
5  
6  
7  
8  
9  
10  
11  
12  
13  
14  
15  
16  
17  
18  
19  
20  
21  
22  
23  
24  
25  
26  
27  
28  
29  
30  
31  
32  
33  
34  
35  
36  
37  
38  
39  
40  
41  
42  
43  
44  
45  
46

For peer review only

(14-95)

|                            |        |                                       |     |       |                        |      |              |        |       |      |                  |                                                                                                                                                                    |
|----------------------------|--------|---------------------------------------|-----|-------|------------------------|------|--------------|--------|-------|------|------------------|--------------------------------------------------------------------------------------------------------------------------------------------------------------------|
| Colombo et al. (2014) [32] | Brazil | Retrospective cohort study            | ICU | 1,392 | Candidemia             | 647  | 66 (18-97) † | 50.7   | 44    | 2.5% | —                | Amphotericin B (period 1:27.8%; period 2: 13.4%)<br>Echinocandins(period 1: 5.9%; period 2: 18.0%)                                                                 |
| Hu et al.(2014) [48]       | China  | Prospective cohort study (China-SCAN) | ICU | 294   | CRCBSI                 | 29   | 69.4 ± 19.1  | 75.9 % | 28.6  | —    | 19.0 ± 13.3 days | Fluconazole (39.3%)<br>Caspofungin(25.0%)<br>Voriconazole(14.3%)<br>Miconazole (10.70%)<br>Itraconazole(10.7%)<br>Amphotericin B (0%)<br>Two-drug combination (0%) |
|                            |        |                                       |     |       |                        |      |              |        |       |      |                  | Non-CRCBSI                                                                                                                                                         |
| Lortholary O (2014) [60]   | France | prospective cohort                    | ICU | 2507  | ICU-aquired candidemia | 1206 | 60 ± 17      | 62.0 % | 57.10 | —    | —                | Fluconazole(55.4 %)<br>Echinocandins(26.2 %)<br>Others (including combination)(12.6 %)                                                                             |
|                            |        |                                       |     |       |                        |      |              |        |       |      |                  | non-ICU aquired candidemia                                                                                                                                         |

|    |                                 |         |                                        |                                            |       |                         |     |                      |        |      |      |                  |                                                                                    |  |
|----|---------------------------------|---------|----------------------------------------|--------------------------------------------|-------|-------------------------|-----|----------------------|--------|------|------|------------------|------------------------------------------------------------------------------------|--|
| 1  |                                 |         |                                        |                                            |       |                         |     |                      |        |      |      |                  |                                                                                    |  |
| 2  |                                 |         |                                        |                                            |       |                         |     |                      |        |      |      |                  |                                                                                    |  |
| 3  |                                 |         |                                        |                                            |       |                         |     |                      |        |      |      |                  |                                                                                    |  |
| 4  |                                 |         |                                        |                                            |       |                         |     |                      |        |      |      |                  |                                                                                    |  |
| 5  | Yapar N                         | Turkey  | retrospective cohort                   | ICU                                        | 1076  | Candidemia              | 66  | 54.4 ± 23.9          | 53%    | 53   | —    | —                | 9%                                                                                 |  |
| 6  | (2014) [61]                     |         |                                        |                                            |       |                         |     |                      |        |      |      |                  |                                                                                    |  |
| 7  |                                 |         |                                        |                                            |       |                         |     |                      |        |      |      |                  |                                                                                    |  |
| 8  |                                 |         |                                        |                                            |       |                         |     |                      |        |      |      |                  |                                                                                    |  |
| 9  |                                 |         |                                        |                                            |       |                         |     |                      |        |      |      |                  |                                                                                    |  |
| 10 |                                 |         |                                        |                                            |       |                         |     |                      |        |      |      |                  |                                                                                    |  |
| 11 |                                 |         |                                        |                                            |       |                         |     |                      |        |      |      |                  |                                                                                    |  |
| 12 |                                 |         |                                        |                                            |       |                         |     |                      |        |      |      |                  |                                                                                    |  |
| 13 | Guo et al.(2013) [49]           | China   | Prospective cohort study (China-SCA N) | MICU SICU General Emergency Neurologic ICU | 306   | Candidemia              | 306 | 61.5±20.0            | 68.6 % | 40.2 | 1.6% | 14 (0-104)† days | Fluconazole (37.7%)<br>Caspofungin (23.9%)<br>Voriconazole (18.3%)                 |  |
| 14 |                                 |         |                                        |                                            |       |                         |     |                      |        |      |      |                  |                                                                                    |  |
| 15 |                                 |         |                                        |                                            |       |                         |     |                      |        |      |      |                  |                                                                                    |  |
| 16 |                                 |         |                                        |                                            |       |                         |     |                      |        |      |      |                  |                                                                                    |  |
| 17 |                                 |         |                                        |                                            |       |                         |     |                      |        |      |      |                  |                                                                                    |  |
| 18 | Giri S (2013) [30]              | India   | prospective cohort                     | ICU                                        | 5,976 | Candidemia              | 39  | 35.14 (3days-79 % y) | 61.5 % | 4    |      |                  |                                                                                    |  |
| 19 |                                 |         |                                        |                                            |       |                         |     |                      |        |      |      |                  |                                                                                    |  |
| 20 |                                 |         |                                        |                                            |       |                         |     |                      |        |      |      |                  |                                                                                    |  |
| 21 |                                 |         |                                        |                                            |       |                         |     |                      |        |      |      |                  |                                                                                    |  |
| 22 |                                 |         |                                        |                                            |       |                         |     |                      |        |      |      |                  |                                                                                    |  |
| 23 | Tortorano et al.(2012) [33]     | Italy   | Prospective cohort study               | MICU, SICU                                 | 384   | Candidemia              | 276 | —                    | —      | 60.9 | —    | —                | Fluconazole (63%)<br>Amphotericin B (22%)<br>Caspofungin (7%)<br>Voriconazole (6%) |  |
| 24 |                                 |         |                                        |                                            |       |                         |     |                      |        |      |      |                  |                                                                                    |  |
| 25 |                                 |         |                                        |                                            |       |                         |     |                      |        |      |      |                  |                                                                                    |  |
| 26 |                                 |         |                                        |                                            |       |                         |     |                      |        |      |      |                  |                                                                                    |  |
| 27 |                                 |         |                                        |                                            |       |                         |     |                      |        |      |      |                  |                                                                                    |  |
| 28 | Ylipalosaari et al. (2012) [34] | Finland | Retrospective cohort study             | MICU,SICU                                  | 82    | ICU-acquired candidemia | 38  | 63 (45-69) §         | 71%    | 76.3 | —    | Median: 22 days  | Fluconazole (73%)<br>Amphotericin B (34%)<br>Echinocandins (31%)                   |  |
| 29 |                                 |         |                                        |                                            |       |                         |     |                      |        |      |      |                  |                                                                                    |  |
| 30 |                                 |         |                                        |                                            |       |                         |     |                      |        |      |      |                  |                                                                                    |  |
| 31 |                                 |         |                                        |                                            |       |                         |     |                      |        |      |      |                  |                                                                                    |  |
| 32 |                                 |         |                                        |                                            |       |                         |     |                      |        |      |      |                  |                                                                                    |  |
| 33 |                                 |         |                                        |                                            |       |                         |     |                      |        |      |      |                  |                                                                                    |  |
| 34 |                                 |         |                                        |                                            |       |                         |     |                      |        |      |      |                  |                                                                                    |  |
| 35 |                                 |         |                                        |                                            |       |                         |     |                      |        |      |      |                  |                                                                                    |  |
| 36 | Pasero D et al. (2011) [35]     | Italy   | Prospective cohort study               | SICU                                       | 349   | Candidemia              | 26  | 60±21                | 61.5 % | 73   | —    | —                | —                                                                                  |  |
| 37 |                                 |         |                                        |                                            |       |                         |     |                      |        |      |      |                  |                                                                                    |  |
| 38 |                                 |         |                                        |                                            |       |                         |     |                      |        |      |      |                  |                                                                                    |  |
| 39 |                                 |         |                                        |                                            |       |                         |     |                      |        |      |      |                  |                                                                                    |  |
| 40 |                                 |         |                                        |                                            |       |                         |     |                      |        |      |      |                  |                                                                                    |  |
| 41 |                                 |         |                                        |                                            |       |                         |     |                      |        |      |      |                  |                                                                                    |  |
| 42 |                                 |         |                                        |                                            |       |                         |     |                      |        |      |      |                  |                                                                                    |  |
| 43 |                                 |         |                                        |                                            |       |                         |     |                      |        |      |      |                  |                                                                                    |  |
| 44 |                                 |         |                                        |                                            |       |                         |     |                      |        |      |      |                  |                                                                                    |  |
| 45 |                                 |         |                                        |                                            |       |                         |     |                      |        |      |      |                  |                                                                                    |  |
| 46 |                                 |         |                                        |                                            |       |                         |     |                      |        |      |      |                  |                                                                                    |  |



| Author (Year) [ref]         | Country         | Study Design               | Setting                  | n   | Pathogen                                                   | n   | APACHE II    | SOFA   | Mortality % | Survival % | LOS (days)     | Treatment                                                                                                             |
|-----------------------------|-----------------|----------------------------|--------------------------|-----|------------------------------------------------------------|-----|--------------|--------|-------------|------------|----------------|-----------------------------------------------------------------------------------------------------------------------|
| Yap et al (2009) [50]       | China Hong Kong | Retrospective cohort study | MICU SICU                | 128 | Candidemia<br>( <i>C. glabrata</i> ,<br><i>C. krusei</i> ) | 128 | 54 (43-68) § | 63.3 % | 56          | 11%        | —              | Amphotericin B (39.1%)<br>Fluconazole (38%)<br>Amphotericin B+fluconazole (13%)<br>Caspofungin or voriconazole (9.8%) |
| Chow et al. (2008) [41]     | US              | Case-control study         | MICU, SICU               | 926 | Candidemia<br>(Non- <i>Candida albicans</i> )              | 67  | 62.3±14.5    | 57%    | —           | —          | —              | Fluconazole (84.8%)<br>Amphotericin B (23.9%)<br>Caspofungin (10.9%)<br>Voriconazole (4.3%)                           |
|                             |                 |                            |                          |     | Candidemia<br>( <i>C. albicans</i> )                       | 79  | 57±17.0      | 60%    | 100         | —          | —              | Fluconazole (63%)<br>Amphotericin B (33.3%)<br>Caspofungin (11.1%)<br>Voriconazole (0%)                               |
|                             |                 |                            |                          |     | Control                                                    | 780 | 62.3±17.4    | 56%    | —           | —          | —              | Fluconazole (100%)<br>Amphotericin B (14.3%)<br>Caspofungin (0%)<br>Voriconazole (0%)                                 |
| Bougnoux et al. (2008) [42] | France          | Prospective cohort study   | MICU<br>SICU<br>HU<br>BU | 290 | Candidemia                                                 | 57  | 56.1±18.2    | 67%    | 54.2        | 19.3%      | 13.2±10.3 days | Fluconazole (78.3%)<br>Amphotericin B (52.2%)<br>Flucytosine (15.2%)                                                  |
| Girão et al. (2008) [43]    | Brazil          | Prospective cohort study   | ICU                      | 73  | Candidemia<br>(Non- <i>Candida</i> )                       | 40  | 51 (12-86) * | 60%    | —           | —          | —              | —                                                                                                                     |

|  |                               |        |                          |            |      |                                            |      |               |        |       |               |                                                                       |                                                                        |
|--|-------------------------------|--------|--------------------------|------------|------|--------------------------------------------|------|---------------|--------|-------|---------------|-----------------------------------------------------------------------|------------------------------------------------------------------------|
|  |                               |        |                          |            |      | <i>albicans</i> )                          |      |               |        |       |               |                                                                       |                                                                        |
|  |                               |        |                          |            |      | Candidemia ( <i>C. albicans</i> )          | 33   | 51(15-86)*    | 40%    | 100   | —             | —                                                                     | —                                                                      |
|  | Dimopoulos et al. (2008) [44] | Greece | Prospective cohort study | MICU, SICU | 56   | Candidemia ( <i>C. albicans</i> )          | 36   | 60.5 ± 14.9   | 44.4 % | 100   | 0% (excluded) | Response rate: (80.6%)                                                | Fluconazole as prophylaxis: Amphotericin B (75%) Caspofungin (25%)     |
|  |                               |        |                          |            |      |                                            |      |               |        |       |               | No fluconazole as prophylaxis: Amphotericin B (60%) Caspofungin (40%) |                                                                        |
|  |                               |        |                          |            |      | Candidemia (Non- <i>Candida albicans</i> ) | 20   | 64.5± 16.8    | 55%    | —     |               | Response rate: (45%)                                                  | Amphotericin B (100%)                                                  |
|  | Dimopoulos et al. (2007) [45] | Greece | Prospective cohort study | MICU, SICU | 24   | Candidemia                                 | 24   | —             | —      | 62.5  | —             | 16.5 (14-24)*days                                                     | <i>C. albicans</i> : fluconazole Non- <i>albicans</i> : amphotericin B |
|  | Jordà-Marcos R (2007) [62]    | Spain  | prospective cohort       | MICU, SICU | 1765 | Candidemia                                 | 63   | 63 (48 - 70)† | 71.4 % | 57.10 | 6.3%          | —                                                                     | 7.90%                                                                  |
|  |                               |        |                          |            |      | Control (non-Candidemia)                   | 1072 | 63 (46 - 71)† | 66.5 % | —     | 2.8%          | —                                                                     | 5.60%                                                                  |
|  | Piazza O (2004) [63]          | Italy  | retrospective cohort     | ICU        | 478  | Candidemia                                 | 12   | 57.58± 22.07  | 58.3 % | 67    | —             | —                                                                     | —                                                                      |



**Table 2. Length of stay, antibiotic therapy prior to candidemia onset, and overall mortality**

| Studies<br>1 <sup>st</sup> Author<br>(year)  | Hospital stay<br>(days)                                                                     | ICU length of stay<br>(days)         | Length of<br>stay prior to<br>ICU<br>admission<br>(days) | Duration of ICU admission<br>prior to candidemia onset<br>(days) | Rate of antibiotic therapy prior<br>to candidemia onset                    | Duration of antibiotic<br>therapy prior to<br>candidemia onset (days) | Overall mortality<br>rate                           |
|----------------------------------------------|---------------------------------------------------------------------------------------------|--------------------------------------|----------------------------------------------------------|------------------------------------------------------------------|----------------------------------------------------------------------------|-----------------------------------------------------------------------|-----------------------------------------------------|
| Zhao H<br>(2018) <sup>[51]</sup>             | N/A                                                                                         | 24 (12-57)†                          | N/A                                                      | N/A                                                              | N/A                                                                        | N/A                                                                   | 58%                                                 |
| Ding R<br>(2018) <sup>[52]</sup>             | N/A                                                                                         | N/A                                  | N/A                                                      | N/A                                                              | Broad-spectrum antibiotics:<br>98.6%                                       | N/A                                                                   | 31.90%                                              |
| Yang et al.<br>(2017) <sup>[26]</sup>        | (prior to IC<br>diagnosis)<br>Early-onset IC:4 (2,<br>7)§<br>Late-onset IC: 26<br>(16, 50)§ | N/A                                  | N/A                                                      | Early-onset IC: 4 (1, 7)§<br>Late-onset IC: 17 (10, 33)§         | Early-onset IC: 62 (59.0%)<br>Late-onset IC: 179 (89.1%)                   | N/A                                                                   | Early-onset IC:<br>28.6%<br>Late-onset IC:<br>40.8% |
| Tigen E<br>(2017) <sup>[53]</sup>            | N/A                                                                                         | 22 (18-30)†<br><br>5.5 (2.25-15.75)† | N/A                                                      | N/A                                                              | Broad-spectrum antibiotic: 100%<br><br>Broad-spectrum antibiotic:<br>59.5% | N/A                                                                   | 83.30%                                              |
| Baldesi O<br>(2017) <sup>[54]</sup>          | N/A                                                                                         | 29 (18; 49) §<br><br>7 (4; 13) §     | N/A                                                      | N/A                                                              | antimicrobials: 82.2%<br><br>antimicrobials: 55.1%                         | N/A                                                                   | 52.40%<br><br>17.80%                                |
| Rudramurt<br>hy SM<br>(2017) <sup>[55]</sup> | N/A                                                                                         | N/A                                  | N/A                                                      | 10 (4.7 – 22.2)§<br><br>7 (3 – 13)§                              | N/A                                                                        | N/A                                                                   | 41.90%<br><br>27%                                   |

|    |                                    |                                                                                    |                                                                                    |             |                               |                                                                                                                      |                   |                                                                                                               |
|----|------------------------------------|------------------------------------------------------------------------------------|------------------------------------------------------------------------------------|-------------|-------------------------------|----------------------------------------------------------------------------------------------------------------------|-------------------|---------------------------------------------------------------------------------------------------------------|
| 1  |                                    |                                                                                    |                                                                                    |             |                               |                                                                                                                      |                   |                                                                                                               |
| 2  |                                    |                                                                                    |                                                                                    |             |                               |                                                                                                                      |                   |                                                                                                               |
| 3  |                                    |                                                                                    |                                                                                    |             |                               |                                                                                                                      |                   |                                                                                                               |
| 4  |                                    |                                                                                    |                                                                                    |             |                               |                                                                                                                      |                   |                                                                                                               |
| 5  | Kawano Y<br>(2017) [56]            | N/A                                                                                | N/A                                                                                | N/A         | 13 (1 – 73)†                  | Broad-spectrum antimicrobial:<br>84%                                                                                 | N/A               | 72%                                                                                                           |
| 6  |                                    |                                                                                    |                                                                                    |             |                               |                                                                                                                      |                   |                                                                                                               |
| 7  | OrtízRuiz<br>et al.<br>(2016) [16] | 35.4±3.0                                                                           | 21.9±1.7                                                                           | N/A         | Median 25                     | Broad-spectrum antibiotic: 93.8<br>vs. 69.8% (case vs. control)                                                      | N/A               | 39.51%                                                                                                        |
| 8  |                                    |                                                                                    |                                                                                    |             |                               |                                                                                                                      |                   |                                                                                                               |
| 9  |                                    |                                                                                    |                                                                                    |             |                               |                                                                                                                      |                   |                                                                                                               |
| 10 |                                    |                                                                                    |                                                                                    |             |                               |                                                                                                                      |                   |                                                                                                               |
| 11 | Gong et al.<br>(2016) [47]         | <i>Candida albicans</i> :<br>Median: 32<br>Non- <i>C. albicans</i> :<br>Median: 44 | <i>Candida albicans</i> :<br>Median: 18<br>Non- <i>C. albicans</i> :<br>Median: 29 | N/A         | N/A                           | <i>Candida albicans</i> (before<br>diagnosis): 76 (77.6%)<br>Non- <i>albicans</i> (before diagnosis):<br>121 (82.9%) | N/A               | <i>Candida albicans</i><br>(before diagnosis):<br>29.6%<br>Non- <i>albicans</i> (befor<br>e diagnosis): 26.7% |
| 12 |                                    |                                                                                    |                                                                                    |             |                               |                                                                                                                      |                   |                                                                                                               |
| 13 |                                    |                                                                                    |                                                                                    |             |                               |                                                                                                                      |                   |                                                                                                               |
| 14 |                                    |                                                                                    |                                                                                    |             |                               |                                                                                                                      |                   |                                                                                                               |
| 15 |                                    |                                                                                    |                                                                                    |             |                               |                                                                                                                      |                   |                                                                                                               |
| 16 |                                    |                                                                                    |                                                                                    |             |                               |                                                                                                                      |                   |                                                                                                               |
| 17 | Playford<br>EG (2016)<br>[57]      | 51 (34 – 89)§<br>23 (13 – 40)§                                                     | 21 ( 14 – 32)§<br>8 ( 5 – 12)§                                                     | N/A         | 10 (5 – 15.25 )†              | N/A                                                                                                                  | N/A               | 26%<br>18.3%                                                                                                  |
| 18 |                                    |                                                                                    |                                                                                    |             |                               |                                                                                                                      |                   |                                                                                                               |
| 19 |                                    |                                                                                    |                                                                                    |             |                               |                                                                                                                      |                   |                                                                                                               |
| 20 |                                    |                                                                                    |                                                                                    |             |                               |                                                                                                                      |                   |                                                                                                               |
| 21 | Pinhati<br>HM (2016)<br>[58]       | N/A                                                                                | N/A                                                                                | N/A         | 22 (0 – 83)†<br>25 (7 – 134)† | any: 47.6%<br>any: 42.1%                                                                                             | N/A               | 42.9%<br>47.4%                                                                                                |
| 22 |                                    |                                                                                    |                                                                                    |             |                               |                                                                                                                      |                   |                                                                                                               |
| 23 |                                    |                                                                                    |                                                                                    |             |                               |                                                                                                                      |                   |                                                                                                               |
| 24 |                                    |                                                                                    |                                                                                    |             |                               |                                                                                                                      |                   |                                                                                                               |
| 25 | Aguilar et<br>al. (2015)<br>[15]   | N/A                                                                                | N/A                                                                                | N/A         | 20 (5, 37.5) §                | Antibiotic therapy:21 (95.4 %)                                                                                       | 10 (5.0–16.5)†    | 13.60%                                                                                                        |
| 26 |                                    |                                                                                    |                                                                                    |             |                               |                                                                                                                      |                   |                                                                                                               |
| 27 |                                    |                                                                                    |                                                                                    |             |                               |                                                                                                                      |                   |                                                                                                               |
| 28 | Fochtman<br>et al.<br>(2015) [27]  | N/A                                                                                | 60 (13–176) †                                                                      | N/A         | 16 (6–89) †                   | Broad-spectrum antibiotic<br>treatment in most patients                                                              | 16 (6–89)†        | 30%                                                                                                           |
| 29 |                                    |                                                                                    |                                                                                    |             |                               |                                                                                                                      |                   |                                                                                                               |
| 30 |                                    |                                                                                    |                                                                                    |             |                               |                                                                                                                      |                   |                                                                                                               |
| 31 |                                    |                                                                                    |                                                                                    |             |                               |                                                                                                                      |                   |                                                                                                               |
| 32 | Klingspore<br>t al.(2015)<br>[28]  | N/A                                                                                | 23 (0–329) †                                                                       | 2 (0-744) † | 12 (0–190) †                  | Broad-spectrum antibiotics in the<br>last 2 weeks: 511 (78.4%)                                                       | N/A               | 38.80%                                                                                                        |
| 33 |                                    |                                                                                    |                                                                                    |             |                               |                                                                                                                      |                   |                                                                                                               |
| 34 |                                    |                                                                                    |                                                                                    |             |                               |                                                                                                                      |                   |                                                                                                               |
| 35 |                                    |                                                                                    |                                                                                    |             |                               |                                                                                                                      |                   |                                                                                                               |
| 36 | Chakrabart<br>i et al.             | N/A                                                                                | N/A                                                                                | N/A         | 8 (4, 15) §                   | Candidemia patients received:<br>antibiotics:93.0%                                                                   | 16.0 (7–36) days§ | 44.70%                                                                                                        |
| 37 |                                    |                                                                                    |                                                                                    |             |                               |                                                                                                                      |                   |                                                                                                               |
| 38 |                                    |                                                                                    |                                                                                    |             |                               |                                                                                                                      |                   |                                                                                                               |
| 39 |                                    |                                                                                    |                                                                                    |             |                               |                                                                                                                      |                   |                                                                                                               |
| 40 |                                    |                                                                                    |                                                                                    |             |                               |                                                                                                                      |                   |                                                                                                               |
| 41 |                                    |                                                                                    |                                                                                    |             |                               |                                                                                                                      |                   |                                                                                                               |
| 42 |                                    |                                                                                    |                                                                                    |             |                               |                                                                                                                      |                   |                                                                                                               |
| 43 |                                    |                                                                                    |                                                                                    |             |                               |                                                                                                                      |                   |                                                                                                               |
| 44 |                                    |                                                                                    |                                                                                    |             |                               |                                                                                                                      |                   |                                                                                                               |
| 45 |                                    |                                                                                    |                                                                                    |             |                               |                                                                                                                      |                   |                                                                                                               |
| 46 |                                    |                                                                                    |                                                                                    |             |                               |                                                                                                                      |                   |                                                                                                               |



(2015) [29]

|                                |                                              |                                                  |                             |                                                     |                                                                   |                                                    |                              |
|--------------------------------|----------------------------------------------|--------------------------------------------------|-----------------------------|-----------------------------------------------------|-------------------------------------------------------------------|----------------------------------------------------|------------------------------|
| Liao et al.<br>(2015) [14]     | Flu-S: 34.5 (18, 65)<br>Flu-R: 48.0 (21, 90) | Flu-S: 22.5 (10.0, 40.0)<br>Flu-R: 29.0 (17, 59) | N/A                         | Flu-S: 8.0 (3.0, 17.0)§<br>Flu-R: 10.5 (4.0, 27.0)§ | ≥5 d before diagnosis:<br>Flu-S: 101 (78.3%)<br>Flu-R: 73 (81.1%) | N/A                                                | Flu-S: 31.8%<br>Flu-R: 41.1% |
| Kautzky S<br>(2015) [59]       | N/A                                          | 46 (14 - 74)†<br>21 (10 - 77)†                   | 17 (1 - 21)†<br>3 (1 - 66)† | 17.4 ± 14.5                                         | 100%<br>90%                                                       | N/A                                                | 80%<br>21.7%                 |
| Karacaer et al.<br>(2014) [31] | 46.8±36.7 (5-190)                            | 32.9±36.9 (0-190)                                | N/A                         | N/A                                                 | N/A                                                               | 15 ± 13.8                                          | 77.70%                       |
| Colombo et al.<br>(2014) [32]  | N/A                                          | N/A                                              | N/A                         | 20 (0-188) †                                        | Prior antibiotic expose: 96.1%                                    | N/A                                                | 70.30%                       |
| Hu et al.<br>(2014) [48]       | 54.0 (26.0-91.0) §                           | 34.0 (18.0-71.0) §                               | N/A                         | 11.0 (4.0, 26.0)§                                   | CRCBSI: 100%<br>N CRCBSI:99.5%                                    | CRCBSI: 11.4 ± 4.2 days;<br>N CRCBSI:10.6 ±6.5 day | 44.80%                       |
| Lortholary O<br>(2014) [60]    | N/A                                          | N/A                                              | N/A                         | N/A                                                 | N/A                                                               | N/A                                                | 51.00%<br>30.70%             |
| Yapar N<br>(2014) [61]         | N/A                                          | 30.9±33<br>12.9±13                               | N/A                         | N/A                                                 | 96.9%<br>78.3%                                                    | N/A                                                | 43.9%<br>32.2%               |
| Guo et al.<br>(2013) [49]      | N/A                                          | N/A                                              | N/A                         | 10 (0-330)†                                         | Treatment before diagnostic confirm: 74 (27.6%)                   | N/A                                                | 36.60%                       |
| Giri S<br>(2013) [30]          | N/A                                          | mean 26.4 (range 9-86) days                      | N/A                         | N/A                                                 | 66.70%                                                            | mean 19.45 (range 4-31) days                       | 24%                          |

|    |                                            |                                                                                           |                                                                       |             |                                                                    |                                                                                                |                                                                           |                                                                |
|----|--------------------------------------------|-------------------------------------------------------------------------------------------|-----------------------------------------------------------------------|-------------|--------------------------------------------------------------------|------------------------------------------------------------------------------------------------|---------------------------------------------------------------------------|----------------------------------------------------------------|
| 1  |                                            |                                                                                           |                                                                       |             |                                                                    |                                                                                                |                                                                           |                                                                |
| 2  |                                            |                                                                                           |                                                                       |             |                                                                    |                                                                                                |                                                                           |                                                                |
| 3  |                                            |                                                                                           |                                                                       |             |                                                                    |                                                                                                |                                                                           |                                                                |
| 4  |                                            |                                                                                           |                                                                       |             |                                                                    |                                                                                                |                                                                           |                                                                |
| 5  | Tortorano et al.(2012) <sup>[33]</sup>     | N/A                                                                                       | N/A                                                                   | N/A         | 22.8 (2–190)†                                                      | broad spectrum antibiotic treatment: 85%                                                       | N/A                                                                       | 46.20%                                                         |
| 6  |                                            |                                                                                           |                                                                       |             |                                                                    |                                                                                                |                                                                           |                                                                |
| 7  |                                            |                                                                                           |                                                                       |             |                                                                    |                                                                                                |                                                                           |                                                                |
| 8  | Ylipalosaari et al. (2012) <sup>[34]</sup> | 38.0 (22- 59) §                                                                           | 16.0 (11-30) §                                                        | 1 (0-2) §   | 8.0 (1.0, 12.0) §                                                  | Previous antibacterial treatment (%): 97.4-95.5%                                               | N/A                                                                       | 65.80%                                                         |
| 9  |                                            |                                                                                           |                                                                       |             |                                                                    |                                                                                                |                                                                           |                                                                |
| 10 |                                            |                                                                                           |                                                                       |             |                                                                    |                                                                                                |                                                                           |                                                                |
| 11 |                                            |                                                                                           |                                                                       |             |                                                                    |                                                                                                |                                                                           |                                                                |
| 12 | Pasero D et al. (2011) <sup>[35]</sup>     | N/A                                                                                       | 21±7                                                                  | N/A         | 20 (8, 49) §                                                       | A significantly higher administration of > 2 antibiotics for >72 hours.                        | N/A                                                                       | 47%                                                            |
| 13 |                                            |                                                                                           |                                                                       |             |                                                                    |                                                                                                |                                                                           |                                                                |
| 14 |                                            |                                                                                           |                                                                       |             |                                                                    |                                                                                                |                                                                           |                                                                |
| 15 |                                            |                                                                                           |                                                                       |             |                                                                    |                                                                                                |                                                                           |                                                                |
| 16 | Han SS et al. (2010) <sup>[36]</sup>       | 38 (2-141)§                                                                               | 22 (1-141)§                                                           | 8 (0-92) §  | 17 (0-117) †                                                       | All patients were treated with antibiotics prior to candidaemia onset                          | 16 (1-92) †                                                               | 96.00%                                                         |
| 17 |                                            |                                                                                           |                                                                       |             |                                                                    |                                                                                                |                                                                           |                                                                |
| 18 |                                            |                                                                                           |                                                                       |             |                                                                    |                                                                                                |                                                                           |                                                                |
| 19 |                                            |                                                                                           |                                                                       |             |                                                                    |                                                                                                |                                                                           |                                                                |
| 20 | Pratikaki M et al. (2009) <sup>[37]</sup>  | N/A                                                                                       | 25 (14-46)§                                                           | 14 (1-20) § | 10 (3, 22) §                                                       | All patients received antimicrobial agents prior to candidaemia onset                          | N/A                                                                       | 60.60%                                                         |
| 21 |                                            |                                                                                           |                                                                       |             |                                                                    |                                                                                                |                                                                           |                                                                |
| 22 |                                            |                                                                                           |                                                                       |             |                                                                    |                                                                                                |                                                                           |                                                                |
| 23 |                                            |                                                                                           |                                                                       |             |                                                                    |                                                                                                |                                                                           |                                                                |
| 24 | Playford et al.(2009) <sup>[38]</sup>      | N/A                                                                                       | NA                                                                    | N/A         | 10 (4, 16) §                                                       | Antibiotic receipt on days 1–3: 83.4%;<br>Broad-spectrum antibiotic receipt on days 1–3: 82.0% | N/A                                                                       | 10.60%                                                         |
| 25 |                                            |                                                                                           |                                                                       |             |                                                                    |                                                                                                |                                                                           |                                                                |
| 26 |                                            |                                                                                           |                                                                       |             |                                                                    |                                                                                                |                                                                           |                                                                |
| 27 |                                            |                                                                                           |                                                                       |             |                                                                    |                                                                                                |                                                                           |                                                                |
| 28 | Holleyetal. (2009) <sup>[39]</sup>         | N/A                                                                                       | <i>C. albicans</i> : 29.0±18.5<br>non- <i>C. albicans</i> : 29.2±28.2 | N/A         | N/A                                                                | All patients received antimicrobial agents prior to candidaemia onset                          | <i>C. albicans</i> : 13 (median)<br>non- <i>C. albicans</i> : 15 (median) | <i>C. albicans</i> : 52.9%<br>non- <i>C. albicans</i> : 64.7%  |
| 29 |                                            |                                                                                           |                                                                       |             |                                                                    |                                                                                                |                                                                           |                                                                |
| 30 |                                            |                                                                                           |                                                                       |             |                                                                    |                                                                                                |                                                                           |                                                                |
| 31 |                                            |                                                                                           |                                                                       |             |                                                                    |                                                                                                |                                                                           |                                                                |
| 32 | Choi et al. (2009) <sup>[40]</sup>         | (prior to fungemia)<br><i>Candida albicans</i> : 42±47<br>Non- <i>C. albicans</i> : 38±33 | <i>Candida albicans</i> : 19±41<br>Non- <i>C. albicans</i> : 25±50    | N/A         | <i>Candida albicans</i> : 11±25<br>Non- <i>C. albicans</i> : 15±31 | N/A                                                                                            | N/A                                                                       | <i>Candida albicans</i> : 48%<br>Non- <i>C. albicans</i> : 67% |
| 33 |                                            |                                                                                           |                                                                       |             |                                                                    |                                                                                                |                                                                           |                                                                |
| 34 |                                            |                                                                                           |                                                                       |             |                                                                    |                                                                                                |                                                                           |                                                                |
| 35 |                                            |                                                                                           |                                                                       |             |                                                                    |                                                                                                |                                                                           |                                                                |
| 36 |                                            |                                                                                           |                                                                       |             |                                                                    |                                                                                                |                                                                           |                                                                |
| 37 |                                            |                                                                                           |                                                                       |             |                                                                    |                                                                                                |                                                                           |                                                                |
| 38 |                                            |                                                                                           |                                                                       |             |                                                                    |                                                                                                |                                                                           |                                                                |
| 39 |                                            |                                                                                           |                                                                       |             |                                                                    |                                                                                                |                                                                           |                                                                |
| 40 |                                            |                                                                                           |                                                                       |             |                                                                    |                                                                                                |                                                                           |                                                                |
| 41 |                                            |                                                                                           |                                                                       |             |                                                                    |                                                                                                |                                                                           |                                                                |
| 42 |                                            |                                                                                           |                                                                       |             |                                                                    |                                                                                                |                                                                           |                                                                |
| 43 |                                            |                                                                                           |                                                                       |             |                                                                    |                                                                                                |                                                                           |                                                                |
| 44 |                                            |                                                                                           |                                                                       |             |                                                                    |                                                                                                |                                                                           |                                                                |
| 45 |                                            |                                                                                           |                                                                       |             |                                                                    |                                                                                                |                                                                           |                                                                |
| 46 |                                            |                                                                                           |                                                                       |             |                                                                    |                                                                                                |                                                                           |                                                                |

|    |                   |                                       |                                       |     |                                                                                  |                                                                                                                     |                 |                                                              |
|----|-------------------|---------------------------------------|---------------------------------------|-----|----------------------------------------------------------------------------------|---------------------------------------------------------------------------------------------------------------------|-----------------|--------------------------------------------------------------|
| 1  |                   |                                       |                                       |     |                                                                                  |                                                                                                                     |                 |                                                              |
| 2  |                   |                                       |                                       |     |                                                                                  |                                                                                                                     |                 |                                                              |
| 3  |                   |                                       |                                       |     |                                                                                  |                                                                                                                     |                 |                                                              |
| 4  |                   |                                       |                                       |     |                                                                                  |                                                                                                                     |                 |                                                              |
| 5  | Yap et al         | 28 (17-54) §                          | 14 (5-23) §                           | N/A | 6 (1-13)§                                                                        | Antibiotics > 48 hours before candidaemia:<br><i>C. albicans</i> : 70 (97.0%)<br><i>non-C. albicans</i> : 56 (100%) | N/A             | 70%                                                          |
| 6  | (2009) [50]       |                                       |                                       |     |                                                                                  |                                                                                                                     |                 |                                                              |
| 7  |                   |                                       |                                       |     |                                                                                  |                                                                                                                     |                 |                                                              |
| 8  |                   |                                       |                                       |     |                                                                                  |                                                                                                                     |                 |                                                              |
| 9  | Chow et al.       | <i>Candida albicans</i> : 28 (20–42)§ | <i>Candida albicans</i> : 22 (15–33)§ | N/A | <i>Candida albicans</i> : 11 (9, 17) §<br>Non- <i>C. albicans</i> : 10 (4, 21) § | Non- <i>C. albicans</i> : 0.75 (0–2) §                                                                              | 2.21 (1.4–2.7)§ | <i>Candida albicans</i> : 58%<br>Non- <i>albicans</i> : 57%; |
| 10 | (2008) [41]       | Non- <i>C. albicans</i> : 37 (24–57)§ | Non- <i>C. albicans</i> : 25 (14–40)§ |     |                                                                                  |                                                                                                                     |                 |                                                              |
| 11 |                   |                                       |                                       |     |                                                                                  |                                                                                                                     |                 |                                                              |
| 12 |                   |                                       |                                       |     |                                                                                  |                                                                                                                     |                 |                                                              |
| 13 |                   |                                       |                                       |     |                                                                                  |                                                                                                                     |                 |                                                              |
| 14 | Bougnoux et al.   | N/A                                   | 43.1 ± 45.2                           | N/A | 19.0 ± 2.9 or (13.0; 2-145)§                                                     | No antibiotic treatment is reported                                                                                 | N/A             | 61.80%                                                       |
| 15 | (2008)            |                                       |                                       |     |                                                                                  |                                                                                                                     |                 |                                                              |
| 16 | [42]              |                                       |                                       |     |                                                                                  |                                                                                                                     |                 |                                                              |
| 17 |                   |                                       |                                       |     |                                                                                  |                                                                                                                     |                 |                                                              |
| 18 | Girão et al.      | N/A                                   | N/A                                   | N/A | <i>C. albicans</i> : 15 (mean)<br>Non- <i>C. albicans</i> : 18 (mean)            | The hospital is restricted the use of several antibiotics                                                           | N/A             | <i>C. albicans</i> : 72%<br>non- <i>C. albicans</i> : 80%    |
| 19 | (2008)            |                                       |                                       |     |                                                                                  |                                                                                                                     |                 |                                                              |
| 20 | [43]              |                                       |                                       |     |                                                                                  |                                                                                                                     |                 |                                                              |
| 21 |                   |                                       |                                       |     |                                                                                  |                                                                                                                     |                 |                                                              |
| 22 | Dimopoulou et al. | <i>C. albicans</i> : 22 ± 7.6         | N/A                                   | N/A | <i>C. albicans</i> : 12 ± 2.2<br>non- <i>C. albicans</i> : 10 ± 2.4              | 100% of patients received broad spectrum antibiotic treatment for >3 days during the ICU stay.                      | N/A             | <i>C. albicans</i> : 52.8%<br>non- <i>C. albicans</i> : 90%  |
| 23 | (2008) [44]       | non- <i>C. albicans</i> : 25 ± 8.4    |                                       |     |                                                                                  |                                                                                                                     |                 |                                                              |
| 24 |                   |                                       |                                       |     |                                                                                  |                                                                                                                     |                 |                                                              |
| 25 |                   |                                       |                                       |     |                                                                                  |                                                                                                                     |                 |                                                              |
| 26 |                   |                                       |                                       |     |                                                                                  |                                                                                                                     |                 |                                                              |
| 27 | Dimopoulou et al. | N/A                                   | N/A                                   | N/A | 9 (5–11) †                                                                       | 100% of patients received broad spectrum antibiotic treatment                                                       | N/A             | N/A                                                          |
| 28 | (2007)            |                                       |                                       |     |                                                                                  |                                                                                                                     |                 |                                                              |
| 29 | [45]              |                                       |                                       |     |                                                                                  |                                                                                                                     |                 |                                                              |
| 30 |                   |                                       |                                       |     |                                                                                  |                                                                                                                     |                 |                                                              |
| 31 | Jordà-Marcos R    | 48 (26 – 69)                          | 28 (17 – 45)                          | N/A | 23.5 ± 54.7                                                                      | 100%                                                                                                                | N/A             | 17.2%                                                        |
| 32 | (2007) [62]       | 35 (22 – 57)                          | 18 (12 – 28)                          |     |                                                                                  | 96.5%                                                                                                               |                 | 13.2%                                                        |
| 33 |                   |                                       |                                       |     |                                                                                  |                                                                                                                     |                 |                                                              |
| 34 |                   |                                       |                                       |     |                                                                                  |                                                                                                                     |                 |                                                              |
| 35 | Piazza O          | N/A                                   | N/A                                   | N/A | median 13 days                                                                   | N/A                                                                                                                 | N/A             | 67%                                                          |
| 36 | (2004) [63]       |                                       |                                       |     |                                                                                  |                                                                                                                     |                 |                                                              |
| 37 |                   |                                       |                                       |     |                                                                                  |                                                                                                                     |                 |                                                              |
| 38 |                   |                                       |                                       |     |                                                                                  |                                                                                                                     |                 |                                                              |
| 39 |                   |                                       |                                       |     |                                                                                  |                                                                                                                     |                 |                                                              |
| 40 |                   |                                       |                                       |     |                                                                                  |                                                                                                                     |                 |                                                              |
| 41 |                   |                                       |                                       |     |                                                                                  |                                                                                                                     |                 |                                                              |
| 42 |                   |                                       |                                       |     |                                                                                  |                                                                                                                     |                 |                                                              |
| 43 |                   |                                       |                                       |     |                                                                                  |                                                                                                                     |                 |                                                              |
| 44 |                   |                                       |                                       |     |                                                                                  |                                                                                                                     |                 |                                                              |
| 45 |                   |                                       |                                       |     |                                                                                  |                                                                                                                     |                 |                                                              |
| 46 |                   |                                       |                                       |     |                                                                                  |                                                                                                                     |                 |                                                              |

|   |                      |     |            |     |              |                                                                                      |
|---|----------------------|-----|------------|-----|--------------|--------------------------------------------------------------------------------------|
| 1 |                      |     |            |     |              |                                                                                      |
| 2 |                      |     |            |     |              |                                                                                      |
| 3 |                      |     |            |     |              |                                                                                      |
| 4 |                      |     |            |     |              |                                                                                      |
| 5 | Michalopoulos et al. | N/A | 27.1 ± 7.5 | N/A | 15 (11-23) † | Empiric antibiotic therapy with 2 N/A or more broad-spectrum agents for all patients |
| 6 | (2003) [46]          |     |            |     |              | N/A                                                                                  |
| 7 |                      |     |            |     |              |                                                                                      |
| 8 |                      |     |            |     |              |                                                                                      |

9 Abbreviation: ARDS, acute respiratory distress syndrome; CPB, cardiopulmonary bypass; CRCBSI, Candida catheter-related bloodstream infection; Flu-R, fluconazole-resistant; Flu-S, fluconazole-sensitive; IC, invasive candidiasis; IMV, invasive mechanical ventilation; N/A, not available; SAPS II, Simplified Acute Physiology Score II; TPN, total parenteral nutrition.

12 § Data are presented as median (interquartile range; IQR).

14 † Data are presented as median (range).

For peer review only

1  
2  
3 Five studies reported the mean ICU stay prior to onset of candidemia. In 4 studies,  
4  
5 the median ICU stay was  $\leq 10$  days, including the early-onset group in the study by  
6  
7 Yang et al [26] and Flu-S group in the study by Liao et al. [14] with the overall  
8  
9 mortality ranged from 28.6% to 70.0%. Three studies reported that the median ICU  
10  
11 stay was  $>10$  days prior to candidemia onset with the overall mortality ranged from  
12  
13 40.8% to 44.8%.  
14  
15

16  
17 Similar to other countries, most of the patients with IC in China received  
18  
19 antibiotic treatment prior to candidemia onset in the ICU, which was ranged from  
20  
21 59.0% of patients in the early-onset group [26] to 100% in the CRCBSI group and  
22  
23 non-*C. albicans* group [49, 51]. Only one study reported the median duration of  
24  
25 antibiotic therapy prior to candidemia onset, which was ranged from 10.6 to 11.4 days  
26  
27 [49].  
28  
29  
30  
31  
32

### 33 **Meta-analysis**

#### 34 ***Summary of the clinical outcomes for overall studies or given subgroups***

35  
36 The summary of variables such as hospital length of stay, ICU length of stay, duration  
37  
38 of ICU admission prior to candidemia onset, length of stay prior to ICU admission,  
39  
40 and overall mortality was presented in Table 3. Five studies [14, 26, 47-49] were from  
41  
42 China by using China-SCAN patient data, in which four studies were excluded to  
43  
44 avoid using repeating data.  
45  
46  
47  
48  
49  
50  
51  
52  
53  
54  
55  
56  
57  
58  
59  
60

1  
2  
3  
4  
5  
6  
7  
8  
9  
10  
11  
12  
13  
14  
15  
16  
17  
18  
19  
20  
21  
22  
23  
24  
25  
26  
27  
28  
29  
30  
31  
32  
33  
34  
35  
36  
37  
38  
39  
40  
41  
42  
43  
44  
45  
46  
47  
48  
49  
50  
51  
52  
53  
54  
55  
56  
57  
58  
59  
60

For peer review only

**Table 3. Summary for length of hospital stay, length of ICU stay, duration of ICU admission prior to candidemia onset, and overall mortality for overall or given subgroups<sup>†‡</sup>**

| Comparison                             | Length of hospital stay, days | ICU length of stay, days      | Duration of ICU admission prior to candidemia onset, days | Length of stay prior to ICU admission, days | Overall mortality             |
|----------------------------------------|-------------------------------|-------------------------------|-----------------------------------------------------------|---------------------------------------------|-------------------------------|
|                                        | Mean (95%CI.)                 | Mean (95%CI.)                 | Mean (95%CI.)                                             | Mean (95%CI.)                               | Rate (95%CI.)                 |
| <b>Overall</b>                         | 36.3(25.8, 46.7)              | 25.8(23.6, 28.1)              | 12.9(11.7, 14.2)                                          | 11.7(0.4, 23.1)                             | 49.3(45.0, 53.5)              |
| <b>Overall optional<sup>abcd</sup></b> | <sup>a</sup> 37.5(33.3, 41.6) | <sup>b</sup> 25.9(23.5, 28.3) | <sup>c</sup> 13.7(12.5, 15.0)                             | —                                           | <sup>d</sup> 51.0(46.6, 55.4) |
| <b>Subgroups</b>                       |                               |                               |                                                           |                                             |                               |
| <b>Type of study</b>                   |                               |                               |                                                           |                                             |                               |
| Prospective                            | 41.0(32.9, 49.1)              | 27.4(24.6, 30.3)              | 12.9(11.5, 14.4)                                          | 19.2(17.2, 21.3)                            | 42.7(37.9, 47.4)              |
| Retrospective/<br>Cross-sectional      | 31.9(18.2, 45.5)              | 23.9(21.1, 26.6)              | 13.7(11.2, 16.2)                                          | 7.4 (-3.7, 18.4)                            | 56.5(48.0, 65.0)              |
| <b>Presence of neutropenia</b>         |                               |                               |                                                           |                                             |                               |
| Neutropenia                            | 34.9(19.8, 50.1)              | 25.42(19.33, 31.50)           | 11.64(9.53, 13.75)                                        | —                                           | 49.6(40.8, 58.3)              |
| Non-neutropenia                        | 22.9(20.9, 25.0)              | —                             | 10.0(9.3, 10.7)                                           | —                                           | 41.3(7.9, 74.7)               |
| <b>Type of ICU</b>                     |                               |                               |                                                           |                                             |                               |
| ICU                                    | 37.7(21.7, 53.7)              | 27.3(24.9, 29.7)              | 14.3(5.7, 6.0)                                            | 17.2(11.9, 22.4)                            | 49.8(44.3, 55.3)              |
| SICU                                   | —                             | 21.7(19.5, 23.9)              | 17.3(11.9, 22.7)                                          | —                                           | 33.1(15.2, 51.1)              |

|                                  |                  |                  |                    |                  |                   |
|----------------------------------|------------------|------------------|--------------------|------------------|-------------------|
| MICU                             | —                | 32.7(10.3, 55.2) | 17.0(16.2, 17.8)   | —                | 88.4(72.8, 104.1) |
| MICU+SICU                        | 34.6(28.2, 41.1) | 22.5(18.4, 26.6) | 10.9(9.6, 12.3)    | —                | 45.7(36.4, 55.0)  |
| <i>C. Albicans</i>               |                  |                  |                    |                  |                   |
| <i>C. Albicans</i>               | 34.2(33.1, 35.3) | 25.9(22.3, 29.5) | 11.0(10.7, 11.3)   | —                | 52.2(40.0, 64.4)  |
| Non <i>C. Albicans</i>           | 27.0(24.3, 29.8) | 25.0(18.0, 31.9) | —                  | —                | —                 |
| <b>Presence of IC/candidemia</b> |                  |                  |                    |                  |                   |
| Candidemia                       | 36.3(32.9, 39.8) | 25.8(23.2, 28.3) | 13.2(12.0, 14.5)   | 10.8(-2.0,23.6)  | 51.4(47.1, 55.8)  |
| IC                               | 33.9(-3.7, 71.4) | 26.4(20.7, 32.1) | 11.5(7.7, 15.3)    | —                | 38.9(27.8, 50.1)  |
| <b>Region</b>                    |                  |                  |                    |                  |                   |
| Asia                             | 36.9(23.0, 50.8) | 25.0(20.9, 29.0) | 17.4(14.6, 20.2)   | 19.3(17.2, 21.4) | 51.2(44.7, 57.7)  |
| Europe/US/Australia              | 33.3(20.8, 45.8) | 27.7(23.3, 32.1) | 18.5(15.3, 21.7)   | 9.6 (-1.2, 20.4) | 48.6(42.4, 54.7)  |
| South America                    | —                | —                | 45.8(27.8, 63.7) * | —                | 54.4(38.0, 70.7)  |



Note: Certain subgroups have only 1 study (degree of freedom = 0).

<sup>a</sup> Excluded Yang et al. (2017), Gong et al (2016), Liao et al. (2015), and Guo et al. (2013).

<sup>b</sup> Excluded Yang et al. (2017), Gong et al (2016), Liao et al. (2015), and Guo et al. (2013).

<sup>c</sup> Excluded Yang et al. (2017), Gong et al (2016), Liao et al. (2015), and Hu et al. (2014).

<sup>d</sup> Excluded Yang et al. (2017), Gong et al (2016), Liao et al. (2015), and Hu et al. (2014).

Dash indicates no available

<sup>†</sup> The range width of 95% CI is related to the accuracy of the estimation. The narrower the range, the higher the accuracy of the estimation. If both the upper and lower limits are positive, the clinical outcome estimate for this group of participants is obviously positive, if the lower limit negative and the upper limit is positive, indicating that the clinical outcome estimate for this type of participants is not significantly greater than 0.

<sup>‡</sup> Meta-regression is used to assess the relationship between study level covariates and effect size when obvious heterogeneity in subgroups.

\* Meta-regression analysis illustrated the South American countries were significantly longer than the Asian, European, Australian, and North American countries in the mean of duration of ICU admission prior to candidemia onset (Asia as reference group, South America  $\beta = 25.83$ ,  $p = 0.0308$ ,  $R^2 = 0.097$ ). Other meta-regression analysis in subgroups in this table did not reach statistical significance.

For overall studies, the length of hospital stay, length of ICU stay, duration of ICU admission prior to candidemia onset, length of stay prior to ICU admission and overall mortality rate were derived as a mean of 36.3 days (95% CI: 25.8 - 46.7), 25.8 days (95% CI: 23.6 - 28.1), 12.9 days (95% CI: 11.7 - 14.2), 11.7 days (95% CI: 0.37 - 23.1), and rate of 49.3% (95% CI: 45.0% - 53.5%), respectively. When the four China-SCANE studies were excluded from the analysis, length of hospital stay, length of ICU stay, duration of ICU admission prior to candidemia onset were derived as a mean of 37.5 days (95% CI: 33.3 - 41.6), 25.9 days (95% CI: 23.5 - 28.3), 13.7 days (95% CI: 12.5 - 15.0), and the overall mortality was 50.99% (95% CI: 46.6% - 55.4%), respectively (Table 3).

The clinical outcomes were also summarized for subgroups of studies (with studies' number  $\geq 2$ ) given the type of study, presence of neutropenia, type of ICU, type of *C.*

*Albicans* isolated, presence of IC/candidemia, and region of countries. The interval

1  
2  
3 estimate showed the summarized statistics of subgroups were all significant except for  
4 length of hospital stay of patients with IC present, length of stay prior to ICU  
5 admission of patients selected from retrospective or cross-sectional type of studies and  
6 patients with candidemia presents (95% CI included zero) (Table 3).  
7  
8  
9

10  
11  
12 According to the summarized statistics, those studies with neutropenic patients  
13 had a greater length of hospital stay (mean=34.9 vs. 22.9 days), a longer duration of  
14 ICU admission prior to candidemia onset (mean=11.6 vs. 10.0 days), and a higher  
15 overall mortality rate (rate: 49.6% vs. 41.3%) compared to those with non-neutropenic  
16 patients. The duration of ICU admission prior to candidemia onset had a mean of 17.3  
17 days, 17 days, 14.3 days, and 10.9 days for studies with patients in surgical ICU  
18 (SICU), medical ICU (MICU), ICU, and MICU+SICU, respectively. Patients with  
19 candidemia had a greater length of hospital stay (mean=36.3 vs. 33.9), longer duration  
20 of ICU admission prior to candidemia onset (mean=13.2 vs. 11.5), and a higher  
21 overall mortality rate (51.4% vs. 38.9%) compared with patients without IC. However,  
22 patients with candidemia had a shorter length of ICU stay (mean=25.8 vs. 26.4 days)  
23 and length of stay prior to ICU admission (mean=10.8 vs. 15.2 days) than patients  
24 with IC. Furthermore, patients with *C. albicans* also had a higher duration of ICU  
25 admission prior to candidemia onset compared to patients with other species of *C.*  
26 *albicans* (mean=11 vs. 10 days). The mean duration of ICU admission prior to  
27 candidemia onset in patients in hospitals was 18.5 days (95% CI=15.3 – 21.7 days) in  
28 Europe, 17.4 days (95% CI: 14.6 – 20.2 days) in Asia, and 45.8 days (95% CI: 27.8 –  
29 63.7 days) in South America. Data from Giro et al.[43] and Gong et al.[47] were  
30 excluded from the summarized analysis due to a lack of standard deviations for mean  
31 values and unavailability of data ranges.  
32  
33  
34  
35  
36  
37  
38  
39  
40  
41  
42  
43  
44  
45  
46  
47  
48  
49  
50  
51  
52  
53  
54  
55  
56  
57  
58  
59  
60

1  
2  
3 ***Broad-spectrum antibiotic use prior to candidemia onset, length of stay prior to***  
4  
5 ***ICU admission, and overall mortality***  
6  
7

8 In order to compare whether there is a differences in the proportion of broad-spectrum  
9 antibiotic use between IC patients and non-IC patients, we reviewed the identified  
10 publications and excluded studies containing control groups (non-invasive candida  
11 infection) and studies with a clear number of broad-spectrum antibiotics utilized.  
12  
13  
14

15  
16 After pooling the study data, there is no statistically significant difference in IC  
17 patients' use of broad-spectrum antibiotics (89.1%, 95% CI: 82.7%-93.4%) prior to IC  
18 onset vs. that of non-IC patients (77.4%, 95% CI: 52.3%-91.4%). The mean duration  
19 of antibiotic therapy prior to candidemia onset was 17.8 days (95% CI: 9.3 - 26.3), but  
20 the duration of broad-spectrum antibiotic use prior to the infection was not included  
21 due to insufficient data. Only five studies reported length of stay prior to ICU  
22 admission and the mean was 11.7 days (95% CI: 0.4 - 23.1). The overall mortality rate  
23 was increased from 49.3% to 51.0% after excluding four China-SCAN studies (Table  
24 3).  
25  
26  
27  
28  
29  
30  
31  
32  
33  
34  
35  
36  
37  
38  
39

40 ***Comparing the effect between *Candida albicans* vs. non-*Candida albicans****  
41

42 A meta-analysis was performed to compare the effect of length of hospital stay, ICU  
43 length of stay, and overall mortality between studies of patients infected with *C.*  
44 *albicans* and different strains of *Candida*. Three studies examined length of hospital  
45 stay (Choi et al 2009, Chow et al. 2008, Dimopoulos et al 2008), three studies  
46 examined ICU length of stay (Holley et al 2009, Choi et al 2009, Chow et al. 2008),  
47 and six studies examined overall mortality (Gong et al 2016, Holley et al 2009, Choi  
48 et al 2009, Chow et al. 2008, Giral et al 2008, Dimopoulos et al 2008) and were  
49 selected for the meta-analysis. According to the heterogeneity test, a random effect  
50  
51  
52  
53  
54  
55  
56  
57  
58  
59  
60

1  
2  
3 model was applied for length of hospital stay (Q value=25.47, I-squared value =  
4  
5 92.1%,  $p<0.001$ ) and overall mortality rate (Q-value=399, I-squared value=98.7%,  
6  
7  $p<0.001$ ) and a fixed effect model for ICU length of stay (Q value = 1.56, I-squared  
8  
9 value = 0%,  $p=0.458$ ). The pooled effect demonstrated that there was no significant  
10  
11 difference in length of stay between patients with and without *C. albicans* (Figure 2A,  
12  
13  $p>0.05$ ); however, there was a significant difference in mean length of ICU stay  
14  
15 (difference in means = 2.8 days, Figure 2B,  $P<0.001$ ). There was also no significant  
16  
17 difference in overall mortality between patients with and without *C. albicans* (Figure  
18  
19 2C,  $p>0.05$ ).  
20  
21  
22  
23  
24  
25  
26

### 27 ***Quality assessment***

28  
29 The results of the quality assessment are shown in Table 4. For the results of  
30  
31 ROBINS-I, 9 studies had serious bias due to confounding because no baseline  
32  
33 confounding or appropriate analysis methods were used to adjust for important  
34  
35 baseline confounding. Five studies had serious bias in the selection of participants due  
36  
37 to unclear inclusion and exclusion criteria. Most of studies had low or moderate bias  
38  
39 in classification of interventions. No studies provided the information of systematic  
40  
41 differences between experimental intervention and comparator groups due to lack of  
42  
43 comparison of two intervention groups. All studies had low or moderate bias due to  
44  
45 missing data, bias in measurement of outcomes and bias in selection of the reported  
46  
47 result. Overall, 28 studies had moderate risk of bias, thirteen had serious risk of bias,  
48  
49 and one had unclear information regarding the risk of bias.  
50  
51  
52  
53  
54

### 55 ***Meta-regression of clinical outcomes***

56  
57 A meta-regression analysis demonstrated that South American countries were  
58  
59 significantly longer than the Asian, European, Australian, and North American  
60

1  
2  
3 countries for mean duration of ICU admission prior to candidemia onset (Asia as  
4 reference group, South America  $\beta = 25.83$ ,  $p = 0.0308$ ,  $R^2 = 0.097$ ). Other  
5  
6 meta-regression analysis in subgroups did not reach statistical significance (Table 3).  
7  
8 The level of risk of bias (moderate/serious or no information) was also included in the  
9  
10 meta-regression analysis and the coefficient was not found to achieve statistically  
11  
12 significant results.  
13  
14  
15  
16  
17  
18  
19  
20  
21  
22  
23  
24  
25  
26  
27  
28  
29  
30  
31  
32  
33  
34  
35  
36  
37  
38  
39  
40  
41  
42  
43  
44  
45  
46  
47  
48  
49  
50  
51  
52  
53  
54  
55  
56  
57  
58  
59  
60

For peer review only

**Table 4. Quality assessment of included studies using ROBINS-I**

| 1st Author (year)                         | Bias due to confounding | Bias in selection of participants into the study | Bias in classification of interventions | Bias due to deviations from intended interventions | Bias due to missing data | Bias in measurement of outcomes | Bias in selection of the reported result | Overall risk of bias |
|-------------------------------------------|-------------------------|--------------------------------------------------|-----------------------------------------|----------------------------------------------------|--------------------------|---------------------------------|------------------------------------------|----------------------|
| Ding et al. (2018) <sup>[52]</sup>        | low                     | moderate                                         | low                                     | no information                                     | moderate                 | low                             | low                                      | moderate             |
| Zhao et al. (2018) <sup>[51]</sup>        | low                     | low                                              | no information                          | no information                                     | low                      | low                             | low                                      | moderate             |
| Baldesi et al. (2017) <sup>[54]</sup>     | low                     | moderate                                         | no information                          | no information                                     | low                      | low                             | low                                      | moderate             |
| Kawano et al. (2017) <sup>[56]</sup>      | serious                 | moderate                                         | low                                     | no information                                     | low                      | low                             | low                                      | serious              |
| Rudramurthy et al. (2017) <sup>[55]</sup> | low                     | low                                              | low                                     | no information                                     | low                      | low                             | low                                      | moderate             |
| Tigen et al. (2017) <sup>[53]</sup>       | serious                 | moderate                                         | low                                     | no information                                     | low                      | low                             | low                                      | serious              |
| Yang et al. (2017) <sup>[26]</sup>        | low                     | low                                              | low                                     | no information                                     | low                      | low                             | moderate                                 | moderate             |
| Gong et al. (2016) <sup>[47]</sup>        | serious                 | moderate                                         | low                                     | no information                                     | low                      | low                             | low                                      | serious              |
| OrtizRuiz et al. (2016) <sup>[16]</sup>   | low                     | low                                              | low                                     | no information                                     | low                      | low                             | low                                      | moderate             |
| Pinhati et al. (2016) <sup>[58]</sup>     | moderate                | moderate                                         | low                                     | no information                                     | low                      | low                             | low                                      | moderate             |
| Playford et al. (2016) <sup>[57]</sup>    | low                     | moderate                                         | no information                          | no information                                     | low                      | low                             | low                                      | moderate             |
| Aguilar et al. (2015) <sup>[15]</sup>     | no information          | moderate                                         | low                                     | no information                                     | low                      | low                             | low                                      | moderate             |
| Chakrabarti et al. (2015) <sup>[29]</sup> | serious                 | low                                              | low                                     | no information                                     | low                      | low                             | low                                      | serious              |

1  
2  
3  
4  
5  
6  
7  
8  
9  
10  
11  
12  
13  
14  
15  
16  
17  
18  
19  
20  
21  
22  
23  
24  
25  
26  
27  
28  
29  
30  
31  
32  
33  
34  
35  
36  
37  
38  
39  
40  
41  
42  
43  
44  
45  
46

|                                         |          |          |                |                |     |     |          |          |
|-----------------------------------------|----------|----------|----------------|----------------|-----|-----|----------|----------|
| Fochtmann et al. (2015)<br>[27]         | low      | moderate | low            | no information | low | low | low      | moderate |
| Kautzky et al. (2015) <sup>[59]</sup>   | serious  | low      | no information | no information | low | low | low      | serious  |
| Klingspor et al.(2015)<br>[28]          | low      | moderate | low            | no information | low | low | low      | moderate |
| Liao et al. (2015) <sup>[14]</sup>      | low      | moderate | low            | no information | low | low | low      | moderate |
| Karacaer et al. (2014) <sup>[31]</sup>  | moderate | moderate | low            | no information | low | low | low      | moderate |
| Colombo et al. (2014)<br>[32]           | low      | moderate | low            | no information | low | low | low      | moderate |
| Hu et al.(2014) <sup>[48]</sup>         | low      | moderate | low            | no information | low | low | low      | moderate |
| Lortholary et al. (2014)<br>[60]        | low      | serious  | low            | no information | low | low | moderate | serious  |
| Yapar et al. (2014) <sup>[61]</sup>     | moderate | moderate | low            | no information | low | low | low      | moderate |
| Giri et al. (2013) <sup>[30]</sup>      | serious  | moderate | low            | no information | low | low | low      | serious  |
| Guo et al.(2013) <sup>[49]</sup>        | low      | low      | low            | no information | low | low | low      | moderate |
| Tortorano et al.(2012)<br>[33]          | serious  | moderate | low            | no information | low | low | low      | serious  |
| Ylipalosaari et al. (2012)<br>[34]      | moderate | moderate | low            | no information | low | low | low      | moderate |
| Pasero et al. (2011) <sup>[35]</sup>    | low      | low      | low            | no information | low | low | low      | moderate |
| Han et al. (2010) <sup>[36]</sup>       | low      | serious  | no information | no information | low | low | low      | serious  |
| Pratikaki et al. (2009) <sup>[37]</sup> | moderate | low      | low            | no information | low | low | low      | moderate |

|    |                                             |                |          |                |                |          |     |     |                |
|----|---------------------------------------------|----------------|----------|----------------|----------------|----------|-----|-----|----------------|
| 1  |                                             |                |          |                |                |          |     |     |                |
| 2  |                                             |                |          |                |                |          |     |     |                |
| 3  |                                             |                |          |                |                |          |     |     |                |
| 4  |                                             |                |          |                |                |          |     |     |                |
| 5  | Playford et al.(2009) <sup>[38]</sup>       | no information | low      | no information | no information | low      | low | low | no information |
| 6  | Holley et al.(2009) <sup>[39]</sup>         | low            | serious  | low            | no information | low      | low | low | serious        |
| 7  | Choi et al. (2009) <sup>[40]</sup>          | low            | serious  | low            | no information | low      | low | low | serious        |
| 8  | Yap et al. (2009) <sup>[50]</sup>           | no information | moderate | low            | no information | low      | low | low | moderate       |
| 9  | Chow et al. (2008) <sup>a</sup>             | low            | low      | low            | no information | low      | low | low | moderate       |
| 10 | Chow et al. (2008) <sup>b</sup>             | low            | moderate | low            | no information | low      | low | low | moderate       |
| 11 | Bougnoux et al. (2008) <sup>[42]</sup>      | no information | low      | low            | no information | low      | low | low | moderate       |
| 12 | Girão et al. (2008) <sup>[43]</sup>         | no information | serious  | low            | no information | low      | low | low | moderate       |
| 13 | Dimopoulos et al. (2008) <sup>[44]</sup>    | low            | low      | low            | no information | low      | low | low | moderate       |
| 14 | Dimopoulos et al. (2007) <sup>[45]</sup>    | serious        | low      | low            | no information | low      | low | low | serious        |
| 15 | Jordà-Marcos et al. (2007) <sup>[62]</sup>  | low            | moderate | low            | no information | low      | low | low | moderate       |
| 16 | Piazza et al. (2004) <sup>[63]</sup>        | serious        | low      | moderate       | no information | moderate | low | low | serious        |
| 17 | Michalopoulos et al. (2003) <sup>[46]</sup> | low            | low      | no information | no information | low      | low | low | moderate       |

<sup>a</sup>, Chow JK<sup>1</sup>, Golan Y, Ruthazer R, Karchmer AW, Carmeli Y, Lichtenberg D, Chawla V, Young J, Hadley S.

Factors associated with candidemia caused by non-albicans Candida species versus Candida albicans in the intensive care unit. Clin Infect Dis. 2008 Apr 15;46(8):1206-13.

doi: 10.1086/529435.



1  
2  
3  
4  
5  
6  
7  
8  
9  
10  
11  
12  
13  
14  
15  
16  
17  
18  
19  
20  
21  
22  
23  
24  
25  
26  
27  
28  
29  
30  
31  
32  
33  
34  
35  
36  
37  
38  
39  
40  
41  
42  
43  
44  
45  
46

<sup>b</sup>, Chow JK<sup>1</sup>, Golan Y, Ruthazer R, Karchmer AW, Carmeli Y, Lichtenberg DA, Chawla V, Young JA, Hadley S. Risk factors for albicans and non-albicans candidemia in the intensive care unit. Crit Care Med. 2008 Jul;36(7):1993-8. doi: 10.1097/CCM.0b013e31816fc4cd.

For peer review only

### Publication bias

Egger's test showed potential publication bias for length of hospital stay (1-tailed  $P < 0.001$ ) and duration of ICU admission prior to candidemia onset (1-tailed  $P = 0.004$ ), and no significant publication bias for length of ICU stay (1-tailed  $P = 0.37$ ) and overall mortality (1-tailed  $P = 0.38$ ). The classic fail-safe N tests indicated that the number of missing studies which would be needed to make the P-values of the summary effect become insignificant was 65,685 for length of stay, 2,304 for ICU length of stay, 89,242 for duration of ICU admission prior to candidemia onset, and 34,263 for overall mortality. These results indicated that the significance of the observed effects of the meta-analyses would not be influenced by the inclusion of additional studies (Figure 3A-C).

### Data sharing

No additional data is available.

## DISCUSSION

The current meta-analysis demonstrated that the pooled mean of duration of ICU admission prior to candidemia varied from approximately 17 days within hospital settings in Asia, to 19 days in Europe, to 46 days in South America. Most of the IC patients had received broad-spectrum antibiotics (89%), and the mean duration of antibiotic therapy prior to candidemia onset was nearly 18 days. The pooled mean mortality rate was approximately 49%. There was no significant difference in length of stay or overall mortality between patients with and without *C. albicans*, but the mean length of ICU stay was greater for patients with *C. albicans* compared to those patients without *C. albicans*.

1  
2  
3  
4  
5  
6  
7  
8  
9  
10  
11  
12  
13  
14  
15  
16  
17  
18  
19  
20  
21  
22  
23  
24  
25  
26  
27  
28  
29  
30  
31  
32  
33  
34  
35  
36  
37  
38  
39  
40  
41  
42  
43  
44  
45  
46  
47  
48  
49  
50  
51  
52  
53  
54  
55  
56  
57  
58  
59  
60

Seven studies were performed in hospitals in China (Table 1). Two studies evaluated patients with *Candida albicans* vs. non-*Candida albicans* candidemia. One study compared patients with catheter-related *Candida* bloodstream infection (CRCBSI) vs. non-CRCBSI, and the other study compared patients with a fluconazole-resistant vs. fluconazole-sensitive (Flu-S) infection. The mean length of hospital stay ranged from 4 (early-onset group) to 54 days, and the mean length of ICU stay ranged from 14 to 34 days. The majority of studies (n=29) were performed in countries other than China. Of these, 7 were case-control or cross-sectional studies, and 34 were retrospective or prospective cohort studies. Eleven were designed to compare patients with and without candidemia. Five studies compared patients with candidemia based on *C. Albicans* vs. another *Candida* strain, and only 1 study compared ICU-acquired candidemia vs. non-ICU acquired candidemia [34]. Most of the studies (n=24) were conducted in general ICUs, and the others in SICUs or in cardio-surgical/cardiothoracic ICUs (CICU) [47], or medical ICUs [36], suggesting that invasive candidiasis is a common problem in critically ill patients regardless of the type of ICU. The mean length of hospital stay ranged from 22 to 51 days, and the mean length of ICU stay ranged from 7 days to 60 days (Table 2). In 9 studies, the median length of ICU stay was  $\leq 10$  days prior to onset of IC, and the overall mortality in ICU patients with candidemia in those studies ranged from 10.6% to 65.8%. In the other studies with a median ICU length of stay  $> 10$  days prior to onset of IC, the overall mortality ranged from 13.6% to 96.0%.

The duration of ICU stay varied widely prior to candidemia onset which indicated that the onset of IC may be initiated by distinct risk factors in the ICU, and the time point to encounter these risk factors was different among critically ill patients. As we have mentioned previously, the major cause of severe candidiasis has been the

1  
2  
3 endogenous colonization of *Candida* species that requires a 7 to 10-day period for the  
4 development of IC after exposure to risk factors [20]. In addition, the median time for  
5 obtaining positive blood cultures was 2–3 days (possibly up to  $\geq 7$  days) [2].  
6  
7

8  
9  
10 Therefore, for patients with a confirmed diagnosis of candidemia onset at 8 days after  
11 ICU admission, the endogenous colonization of *Candida* species may have occurred  
12 in patients on the first day of ICU admission. Similarly, for the patients with a  
13 confirmed diagnosis of candidemia at 12-13 days after ICU admission, the  
14 endogenous colonization of *Candida* species may have also occurred 3-5 days after  
15 ICU admission.  
16  
17  
18  
19  
20  
21  
22  
23

24 The main risk factor for candidemia was systemic antibiotic use [16]. In a  
25 previously reported study in pediatric ICUs, it was reported that treatment with  
26 vancomycin or anti-anaerobic antibiotics for  $>3$  days were independently associated  
27 with the development of candidemia [2], but only in an unadjusted analysis [16]. A  
28 study in Hong Kong found that candidemia occurred in patients within 6 days of  
29 being admitted to the ICU, and more than 97.0% of patients infected with fungi of  
30 *Candida* species had received  $>48$  hours of antibiotic treatment [64]. Overuse and  
31 prolonged exposure to broad-spectrum antibiotics have been found that closely  
32 associates them with candidemia in both China and India [65, 66], so it's reasonable to  
33 suspect a link between overuse of broad-spectrum antibiotics and early-onset of  
34 candidemia after ICU admission. Regardless of geographical differences, most  
35 patients with IC received broad-spectrum antibiotic treatment prior to candidemia  
36 onset in the ICU. However, due to a lack of sufficient data, potential correlation  
37 between prolonged exposure to broad-spectrum antibiotics and the time of candidemia  
38 onset after ICU admission, as well as further explanation of the longer duration of  
39 ICU admission prior to candidemia onset in South America than in  
40  
41  
42  
43  
44  
45  
46  
47  
48  
49  
50  
51  
52  
53  
54  
55  
56  
57  
58  
59  
60

1  
2  
3 Asia/Europe/US/Australia could not be established in this systematic review.  
4

5 The current results demonstrated that there was no significant difference in length  
6 of hospital stay prior to the development of IC or overall mortality between patients  
7 with and without *C. albicans* IC. This may be due to the clinical presentation and the  
8 treatment of patients with candidemia caused by *C. albicans* and non-*C. albicans* were  
9 indistinguishable [67]. Although it was found that the mortality rates in patients with  
10 *C. albicans* and non-*C. albicans* was similar, the susceptibilities of these strains to  
11 anti-fungal agents were different [21, 68, 69].  
12  
13  
14  
15  
16  
17  
18  
19  
20  
21

22 This systematic review had several limitations. This systematic review was  
23 lacking a pre-specified protocol and its preliminary registration, the biased post hoc  
24 decisions in review methods may occur. A number of the trials reported outcomes  
25 using median (range) and/or median (IQR). In order to combine results, the sample  
26 mean and standard deviation for such trials was estimated using a method proposed by  
27 Wan et al. [24]. This method was based under the assumption that the data were  
28 normally distributed. Across the meta-analysis, however, medians and quartiles were  
29 often reported when data did not follow a normal distribution [23]. This possibility  
30 may have confounded the results. The results of the quality assessment indicated that  
31 potential biases from confounders may be present. High heterogeneity had existed in  
32 the overall and subgroup analyses, suggesting the complexity of the risk factors  
33 causing IC and candidemia (Supplementary Table S1).  
34  
35  
36  
37  
38  
39  
40  
41  
42  
43  
44  
45  
46  
47  
48

49 Although meta-regression analysis in different design, country, and risk of bias et  
50 al, which may be find the heterogeneity between groups were assessed in this study,  
51 there may still be other potential factors that explain heterogeneity that requires  
52 further study. Besides the factors analyzed in the subgroup analyses, there may be  
53 other factors influencing heterogeneity such as comorbidities, severity of illness, and  
54  
55  
56  
57  
58  
59  
60

1  
2  
3  
4  
5  
6  
7  
8  
9  
10  
11  
12  
13  
14  
15  
16  
17  
18  
19  
20  
21  
22  
23  
24  
25  
26  
27  
28  
29  
30  
31  
32  
33  
34  
35  
36  
37  
38  
39  
40  
41  
42  
43  
44  
45  
46  
47  
48  
49  
50  
51  
52  
53  
54  
55  
56  
57  
58  
59  
60

invasive procedures (e.g., hemodialysis, invasive mechanical ventilation, total parenteral nutrition, surgery, and immunosuppression), which were not taken into account in this analysis. Publication bias may have also possibly existed in some analyzed outcomes.

This systematic review indicated that patients who received broad-spectrum antibiotics and who were admitted to the ICU were associated with the development of candidemia. Patients with *C. albicans* infection had longer ICU stays. In this setting, the choice of early detection and therapeutic intervention strategies for IC should strengthen implementation to optimize patients' management to reduce the risk of infection and potentially save the excessive consumption of medical resources.

### **Acknowledgements**

The medical writing and editorial assistance were provided by Elizabeth Goodwin and Prof. Jerry Tseng of MedCom Asia Inc., China. This assistance was funded by MSD China. The authors initiated the concept for this systematic review and are responsible for the content of the manuscript.

**Competing interests:** The authors declare that they have no competing interests

**Funding:** None

### **Authors' contributions:**

ZDZ: guarantor of integrity of the entire study; study concepts; study design; definition of intellectual content; manuscript editing; manuscript review.

RZ: guarantor of integrity of the entire study; study concepts; study design; definition of intellectual content; manuscript editing; manuscript review.

ZGL: guarantor of integrity of the entire study; study concepts; study design; definition of intellectual content; manuscript editing; manuscript review.

1  
2  
3 XCM: guarantor of integrity of the entire study; study concepts; study design;  
4  
5 definition of intellectual content; manuscript editing; manuscript review.  
6  
7

8 **Data sharing statement:** No additional data are available.  
9  
10  
11  
12  
13  
14  
15  
16  
17  
18  
19  
20  
21  
22  
23  
24  
25  
26  
27  
28  
29  
30  
31  
32  
33  
34  
35  
36  
37  
38  
39  
40  
41  
42  
43  
44  
45  
46  
47  
48  
49  
50  
51  
52  
53  
54  
55  
56  
57  
58  
59  
60

For peer review only

## REFERENCES

1. Calandra T, Roberts JA, Antonelli M, et al. Diagnosis and management of invasive candidiasis in the ICU: an updated approach to an old enemy. *Crit Care* 2016;20:125.
2. Pappas PG, Kauffman CA, Andes DR, et al. Executive Summary: Clinical Practice Guideline for the Management of Candidiasis: 2016 Update by the Infectious Diseases Society of America. *Clin Infect Dis* 2016;62:409-17.
3. Bassetti M, Peghin M, Timsit JF. The current treatment landscape: candidiasis. *J Antimicrob Chemother*. 2016;71:ii13-ii22.
4. Yapar N. Epidemiology and risk factors for invasive candidiasis. *Ther Clin Risk Manag*. 2014;10:95-105.
5. Strollo S, Lionakis MS, Adjemian J, et al. Epidemiology of Hospitalizations Associated with Invasive Candidiasis, United States, 2002-2012. *Emerg Infect Dis*. 2016;23:7-13.
6. Leon C, Ostrosky-Zeichner L, Schuster M. What's new in the clinical and diagnostic management of invasive candidiasis in critically ill patients. *Intensive Care Med* 2014;40:808-19.
7. Yang SP, Chen YY, Hsu HS, et al. A risk factor analysis of healthcare-associated fungal infections in an intensive care unit: a retrospective cohort study. *BMC Infect Dis* 2013;13:10.
8. Montagna MT, Lovero G, Borghi E, et al. Candidemia in intensive care unit: a nationwide prospective observational survey (GISIA-3 study) and review of the European literature from 2000 through 2013. *Eur Rev Med Pharmacol Sci*. 2014;18:661-74.



- 1  
2  
3 9. Bassetti M, Garnacho-Montero J, Calandra T, et al. Intensive care medicine  
4  
5 research agenda on invasive fungal infection in critically ill patients. *Intensive*  
6  
7 *Care Med.* 2017;43:1225-38.  
8  
9
- 10 10. Clancy CJ, Nguyen MH. The end of an era in defining the optimal treatment of  
11  
12 invasive candidiasis. *Clin Infect Dis.* 2012;54:1123-5.  
13  
14
- 15 11. Kullberg BJ, Arendrup MC. Invasive Candidiasis. *N Engl J Med.*  
16  
17 2016;374:794-5.  
18
- 19 12. Paphitou NI, Ostrosky-Zeichner L, Rex JH. Rules for identifying patients at  
20  
21 increased risk for candidal infections in the surgical intensive care unit: an  
22  
23 approach to developing practical criteria for systematic use in antifungal  
24  
25 prophylaxis trials. *Med Mycol*2005;43:235–43  
26  
27
- 28 13. Ostrosky-Zeichner L, Sable C, Sobel J, et al. Multicenter retrospective  
29  
30 development and validation of a clinical prediction rule for  
31  
32 nosocomial invasive candidiasis in the intensive care setting. *Eur J*  
33  
34 *Clin Microbiol Infect Dis.* 2007;26:271-6.  
35  
36
- 37 14. Liao X, Qiu H, Li R, et al. Risk factors for fluconazole-resistant invasive  
38  
39 candidiasis in intensive care unit patients: An analysis from the China Survey  
40  
41 of Candidiasis study. *J Crit Care* 2015;30:862.e861-5.  
42  
43  
44
- 45 15. Aguilar G, Delgado C, Corrales I, et al. Epidemiology of invasive candidiasis in  
46  
47 a surgical intensive care unit: an observational study. *BMC Res Notes*  
48  
49 2015;8:491.  
50
- 51 16. Ortiz Ruiz G, Osorio J, Valderrama S, et al. Risk factors for candidemia in  
52  
53 non-neutropenic critical patients in Colombia. *Med Intensiva.*2016;40:139-44.  
54  
55
- 56 17. Ostrosky-Zeichner L. Clinical prediction rules for invasive candidiasis in the  
57  
58 ICU: ready for prime time? *Crit Care.* 2011;15:189.  
59  
60

- 1  
2  
3 18. León C, Ruiz-Santana S, Saavedra P, et al. Contribution of Candida biomarkers  
4 and DNA detection for the diagnosis of invasive candidiasis in ICU patients  
5 with severe abdominal conditions. *Crit Care*. 2016;20:149.  
6  
7
- 8  
9  
10 19. Martín-Mazuelos E, Loza A, Castro C, et al.  $\beta$ -D-Glucan and Candida albicans  
11 germ tube antibody in ICU patients with invasive candidiasis. *Intensive Care*  
12 *Med*. 2015;41:1424-32.  
13  
14
- 15  
16  
17 20. Eggimann P, Que YA, Revelly JP, Pagani JL. Preventing invasive candida  
18 infections. Where could we do better? *J Hosp Infect*. 2015;89:302-8.  
19  
20
- 21  
22 21. Sterne JAC, Hernán MA, Reeves BC, et al. ROBINS-I: a tool for assessing risk  
23 of bias in non-randomized studies of interventions. *BMJ*. 2016; 355; i4919.  
24  
25
- 26  
27 22. Sterne JAC, Higgins JPT, Elbers RG, Reeves BC and the development group for  
28 ROBINS-I. Risk Of Bias In Non-randomized Studies of Interventions  
29 (ROBINS-I): detailed guidance, updated 12 October 2016. Available from  
30 <http://www.riskofbias.info>.  
31  
32  
33
- 34  
35  
36 23. Zeng X, Zhang Y, Kwong JS, Zhang C, Li S, Sun F, Niu Y, Du L. The  
37 methodological quality assessment tools for preclinical and clinical studies,  
38 systematic review and meta-analysis, and clinical practice guideline: a  
39 systematic review. *J Evid Based Med*, 2015, 8(1):2-10.)  
40  
41  
42  
43
- 44  
45 24. Wan X, Wang W, Liu J, Tong T. Estimating the sample mean and standard  
46 deviation from the sample size, median, range and/or interquartile range. *BMC*  
47 *Med Res Methodol*. 2014;14:135.  
48  
49
- 50  
51  
52 25. Sterne JA, Sutton AJ, Ioannidis JP, et al. Recommendations for examining and  
53 interpreting funnel plot asymmetry in meta-analyses of randomised controlled  
54 trials. *BMJ*. 2011 Jul 22;343:d4002.  
55  
56  
57  
58  
59  
60

- 1  
2  
3 26. Yang Y, Guo F, Kang Y, et al. Epidemiology, clinical characteristics, and risk  
4 factors for mortality of early- and late-onset invasive candidiasis in intensive  
5 care units in China. *Medicine (Baltimore)*. 2017;96:e7830.  
6  
7  
8  
9  
10 27. Fochtmann A, Forstner C, Haggmann M, et al. Predisposing factors for  
11 candidemia in patients with major burns. *Burns*. 2015;41:326-32.  
12  
13  
14 28. Klingspor L, Tortorano AM, Peman J, et al. Invasive *Candida* infections in  
15 surgical patients in intensive care units: a prospective, multicentre survey  
16 initiated by the European Confederation of Medical Mycology (ECMM)  
17 (2006-2008). *Clin Microbiol Infect*. 2015;21:87.e81-7.e10.  
18  
19  
20  
21  
22  
23 29. Chakrabarti A, Sood P, Rudramurthy SM, et al. Incidence, characteristics and  
24 outcome of ICU-acquired candidemia in India. *Intensive Care*  
25 *Med*. 2015;41:285-95.  
26  
27  
28  
29  
30 30. Giri S, Kindo AJ, Kalyani J. Candidemia in intensive care unit patients: a  
31 one-year study from a tertiary center in South India. *J Postgrad Med*.  
32 2013;59(3):190-5.  
33  
34  
35  
36  
37 31. Karacaer Z, Oncul O, Turhan V, Gorenek L, Ozyurt M. A surveillance of  
38 nosocomial candida infections: epidemiology and influences on mortality in  
39 intensive care units. *Pan Afr Med J*. 2014;19:398.  
40  
41  
42  
43  
44 32. Colombo AL, Guimaraes T, Sukienik T, et al. Prognostic factors and historical  
45 trends in the epidemiology of candidemia in critically ill patients: an analysis of  
46 five multicenter studies sequentially conducted over a 9-year period. *Intensive*  
47 *Care Med*. 2014;40:1489-98.  
48  
49  
50  
51  
52  
53 33. Tortorano AM, Dho G, Prigitano A, et al. Invasive fungal infections in the  
54 intensive care unit: a multicentre, prospective, observational study in Italy  
55 (2006-2008). *Mycoses*. 2012;55:73-9.  
56  
57  
58  
59  
60

- 1  
2  
3 34. Ylipalosaari P, Ala-Kokko TI, Karhu J, et al. Comparison of the epidemiology,  
4 risk factors, outcome and degree of organ failures of patients with candidemia  
5 acquired before or during ICU treatment. Crit Care. 2012;16:R62.  
6  
7  
8  
9  
10 35. Pasero D, De Rosa FG, Rana NK, et al. Candidemia after cardiac surgery in the  
11 intensive care unit: an observational study. Interact CardiovascThorac  
12 Surg.2011;12:374-8.  
13  
14  
15  
16  
17 36. Han SS, Yim JJ, Yoo CG, et al. Clinical characteristics and risk factors for  
18 nosocomial candidemia in medical intensive care units: experience in a single  
19 hospital in Korea for 6.6 years. J Korean Med Sci.2010;25:671-6.  
20  
21  
22  
23  
24 37. Pratikaki M, Platsouka E, Sotiropoulou C, et al. Epidemiology, risk factors for  
25 and outcome of candidaemia among non-neutropenic patients in a Greek  
26 intensive care unit. Mycoses.2011;54:154-61.  
27  
28  
29  
30  
31 38. Playford EG, Lipman J, Kabir M, et al. Assessment of clinical risk predictive  
32 rules for invasive candidiasis in a prospective multicentre cohort of ICU  
33 patients. Intensive Care Med.2009;35:2141-5.  
34  
35  
36  
37  
38 39. Holley A, Dulhunty J, Blot S, et al. Temporal trends, risk factors and outcomes  
39 in albicans and non-albicanscandidaemia: an international epidemiological  
40 study in four multidisciplinary intensive care units. Int J Antimicrob  
41 Agents.2009;33:554.e551-7.  
42  
43  
44  
45  
46  
47 40. Choi HK, Jeong SJ, Lee HS, et al. Blood stream infections by *Candida*  
48 *glabrata* and *Candida krusei*: A single-center experience. Korean J Intern  
49 Med. 2009;24:263-9.  
50  
51  
52  
53  
54 41. Chow JK, Golan Y, Ruthazer R, et al. Risk factors for albicans and  
55 non-albicanscandidemia in the intensive care unit. Crit Care  
56 Med.2008;36:1993-8.  
57  
58  
59  
60

- 1  
2  
3 42. Bougnoux ME, Kac G, Aegerter P, d'Enfert C, Fagon JY. Candidemia and  
4  
5 candiduria in critically ill patients admitted to intensive care units in France:  
6  
7 incidence, molecular diversity, management and outcome. *Intensive Care*  
8  
9 *Med.*2008;34:292-9.  
10  
11  
12 43. Girão E, Levin AS, Basso M, et al. Seven-year trend analysis of nosocomial  
13  
14 candidemia and antifungal (fluconazole and caspofungin) use in Intensive Care  
15  
16 Units at a Brazilian University Hospital. *Med Mycol.*2008;46:581-8.  
17  
18  
19 44. Dimopoulos G, Ntziora F, Rachiotis G, Armaganidis A, Falagas ME. *Candida*  
20  
21 *albicans* versus non-*albicans* intensive care unit-acquired bloodstream  
22  
23 infections: differences in risk factors and outcome.  
24  
25 *AnesthAnalg.*2008;106:523-9.  
26  
27  
28 45. Dimopoulos G, Karabinis A, Samonis G, Falagas ME. Candidemia in  
29  
30 immunocompromised and immunocompetent critically ill patients: a  
31  
32 prospective comparative study. *Eur J ClinMicrobiol Infect.*  
33  
34 *Dis.*2007;26:377-84.  
35  
36  
37 46. Michalopoulos AS, Geroulanos S, Mentzelopoulos SD. Determinants of  
38  
39 candidemia and candidemia-related death in cardiothoracic ICU patients.  
40  
41 *Chest.*2003;124:2244-55.  
42  
43  
44 47. Gong X, Luan T, Wu X, et al. Invasive candidiasis in intensive care  
45  
46 units in China: Risk factors and prognoses of *Candida albicans* and  
47  
48 non-*albicans Candida* infections. *Am J Infect Control.* 2016;44:e59-63.  
49  
50  
51 48. Hu B, Du Z, Kang Y, et al. Catheter-related *Candida* bloodstream infection in  
52  
53 intensive care unit patients: a subgroup analysis of the China-SCAN study.  
54  
55 *BMC Infect Dis.*2014;14:594.  
56  
57  
58  
59  
60

- 1  
2  
3 49. Guo F, Yang Y, Kang Y, et al. Invasive candidiasis in intensive care units in  
4  
5 China: a multicentre prospective observational study. *J Antimicrob*  
6  
7 *Chemother.*2013;68:1660-8.  
8  
9
- 10 50. Yap HY, Kwok KM, Gomersall CD, et al. Epidemiology and outcome of  
11  
12 *Candida* bloodstream infection in an intensive care unit in Hong Kong. *Hong*  
13  
14 *Kong Med J.*2009;15:255-61.  
15  
16
- 17 51. Zhao H, Wong C, Wu P, et al. An analysis of mortality and clinical  
18  
19 characteristics of ICU-acquired candidemia patients. *Chin Crit Care*  
20  
21 *Med.*2018;30(10):929-32.  
22  
23
- 24 52. Ding R, Ji Y, Liu B, et al. Risk factors for mortality in cases of intensive care  
25  
26 unit-acquired candidemia: a 5.5-year, single-center, retrospective study. *Int J*  
27  
28 *Clin Exp Med.*2018;11(9):9950-7.  
29  
30
- 31 53. Tigen ET, Bilgen H, Gurun HP, et al. Risk factors, characteristics, and outcomes  
32  
33 of candidemia in an adult intensive care unit in Turkey. *Am J Infec*  
34  
35 *Control.*2017;45:e61-3.  
36  
37
- 38 54. Baldesi O, Bailey S, Ruckly S, et al. ICU-acquired candidemia in France:  
39  
40 epidemiology and temporal trends, 2004-2013-a study from REA-RAISIN  
41  
42 network. *J Infection.*2017;75:59-67.  
43  
44
- 45 55. Rudramurthy SM, Chakrabarti A, Paul RA, et al. *Candida auris* candidemia in  
46  
47 Indian ICUs: analysis of risk factors. *J Antimicrob*  
48  
49 *Chemother.*2017;72:1794-1801.  
50  
51
- 52 56. Kawano Y, Togawa A, Nakamura Y, et al. Prognostic factors for candidemia in  
53  
54 intensive care unit patients: a retrospective analysis. *Singapore Med*  
55  
56 *J.*2017;58(4):196-200.  
57  
58  
59  
60

- 1  
2  
3 57. Playford EG, Lipman J, Jones M, et al. Problematic dichotomization of risk for  
4  
5 intensive care unit (ICU)-acquired invasive candidiasis: results using a  
6  
7 risk-predictive model to categorize 3 levels of risk from a multi-center  
8  
9 prospective cohort of Australian ICU patients. *Clin Infect*  
10  
11 *Dis.*2016;63(11):1463-9.  
12  
13  
14 58. Pinhati HM, Casulari LA, Souza AC, et al. *BMC Infect Dis.*2016;16(433):1-6.  
15  
16  
17 59. Kautzky S, Staudinger T, Presteri E. Invasive candida infection in patients of a  
18  
19 medical intensive care unit. *Wien Klin Wochenschr.*2015;127: 132-42.  
20  
21  
22 60. Lortholary O, Renaudat C, Sitbon K, et al. The risk and clinical outcome of  
23  
24 candidemia depending on underlying malignancy. *Intensive Care*  
25  
26 *Med.*2017;43:652-662.  
27  
28  
29 61. Yapar N, Akan M, Avkan-Oguz V, et al. Risk factors, incidence and outcome of  
30  
31 candidemia in a Turkish intensive-care unit: a five-year retrospective cohort  
32  
33 study. *Anaesth Pain Intensive Care.*2014;18(3): 265-71.  
34  
35  
36 62. Jorda-Marcos R, Alvarez-Lerma F, Jurado M, et al. Risk factors for candidemia  
37  
38 in critically ill patients: a prospective surveillance study.  
39  
40 *Mycoses.*2007;50:302-10.  
41  
42  
43 63. Piazza O, Boccia MC, Iasiello A, et al. Candidemia in intensive care patients.  
44  
45 *Minerva Anesthesiol.*2003;70:63-9.  
46  
47  
48 64. Wang J, Wang P, Wang X, Zheng Y, Xiao Y. Use and prescription of antibiotics  
49  
50 in primary health care settings in China. *JAMA Intern Med.* 2014;174:1914-20.  
51  
52  
53 65. Agrawal C, Biswas D, Gupta A, Chauhan BS. Antibiotic overuse as a risk factor  
54  
55 for candidemia in an Indian pediatric ICU. *Indian J Pediatr.* 2015;82:530-6.  
56  
57  
58  
59  
60

- 1  
2  
3 66. Cheng MF, Yang YL, Yao TJ, et al. Risk factors for fatal candidemia caused by  
4  
5 Candida albicans and non-albicans Candida species. BMC Infect  
6  
7 Dis.2005;5:22.  
8  
9  
10 67. Cheng MF, Yu KW, Tang RB, et al. Distribution and antifungal susceptibility of  
11  
12 Candida species causing candidemia from 1996 to 1999. DiagnMicrobiol Infect  
13  
14 Dis.2004;48:33-7.  
15  
16  
17 68. Yang YL, Ho YA, Cheng HH, Ho M, Lo HJ. Susceptibilities of Candida species  
18  
19 to amphotericin B and fluconazole: the emergence of fluconazole resistance in  
20  
21 Candida tropicalis. Infect Control Hosp Epidemiol.2004;25:60-4.  
22  
23  
24 69. Yang YL, Cheng HH, Lo HJ. In vitro activity of voriconazole against Candida  
25  
26 species isolated in Taiwan. Int J Antimicrob Agents.2004;24:294-6.  
27  
28  
29  
30  
31  
32  
33  
34  
35  
36  
37  
38  
39  
40  
41  
42  
43  
44  
45  
46  
47  
48  
49  
50  
51  
52  
53  
54  
55  
56  
57  
58  
59  
60



1  
2  
3  
4 **Figure legends**  
5  
6  
7

8 **Figure 1.** PRISMA flow diagram of study selection  
9

10  
11 **Figure 2.** Meta-analysis of *C. albicans* vs. non-*C. albicans* for A) length of hospital  
12  
13  
14 stay; B) ICU length of stay; and C) Overall mortality  
15  
16

17  
18 **Figure 3.** Funnel plot for A) length of hospital stay; B) ICU length of stay; C)  
19  
20 duration of ICU admission prior to candidemia onset  
21  
22  
23  
24  
25  
26  
27  
28  
29  
30  
31  
32  
33  
34  
35  
36  
37  
38  
39  
40  
41  
42  
43  
44  
45  
46  
47  
48  
49  
50  
51  
52  
53  
54  
55  
56  
57  
58  
59  
60

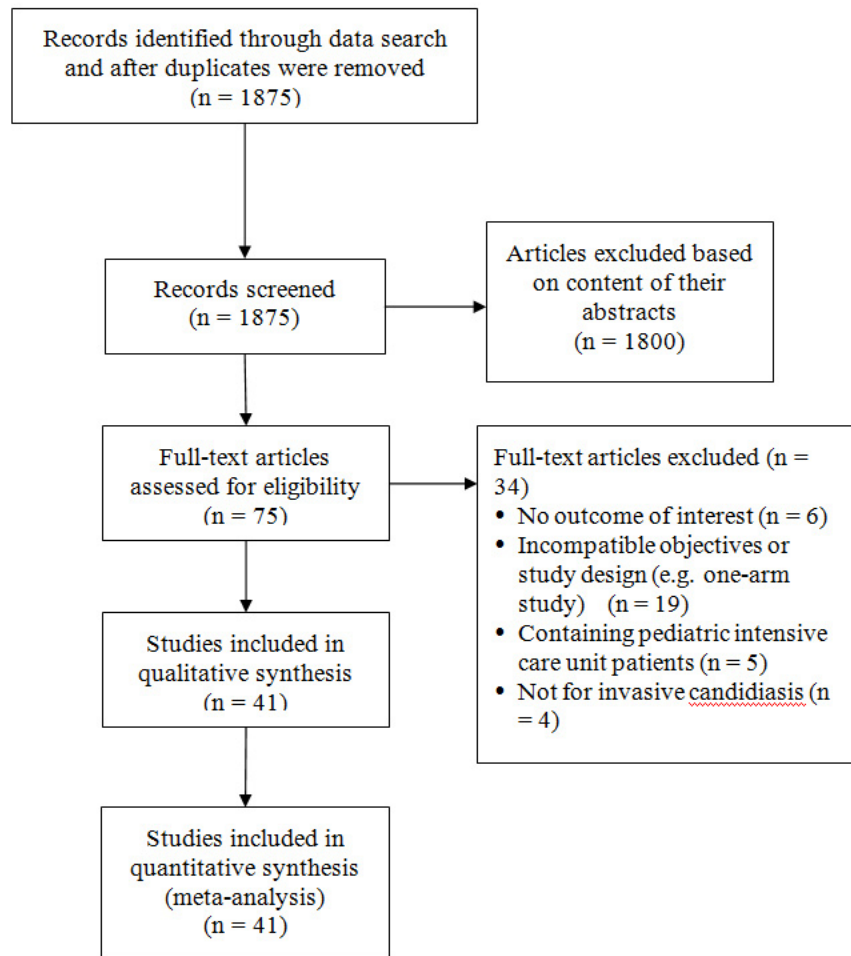

264x283mm (72 x 72 DPI)

1  
2  
3  
4  
5  
6  
7  
8  
9  
10  
11  
12  
13  
14  
15  
16  
17  
18  
19  
20  
21  
22  
23  
24  
25  
26  
27  
28  
29  
30  
31  
32  
33  
34  
35  
36  
37  
38  
39  
40  
41  
42  
43  
44  
45  
46  
47  
48  
49  
50  
51  
52  
53  
54  
55  
56  
57  
58  
59  
60

## Unable to Convert Image

The dimensions of this image (in pixels) are too large to be converted. For this image to convert, the total number of pixels (height x width) must be less than 40,000,000 (40 megapixels).

1  
2  
3  
4  
5  
6  
7  
8  
9  
10  
11  
12  
13  
14  
15  
16  
17  
18  
19  
20  
21  
22  
23  
24  
25  
26  
27  
28  
29  
30  
31  
32  
33  
34  
35  
36  
37  
38  
39  
40  
41  
42  
43  
44  
45  
46  
47  
48  
49  
50  
51  
52  
53  
54  
55  
56  
57  
58  
59  
60

Figure 3A

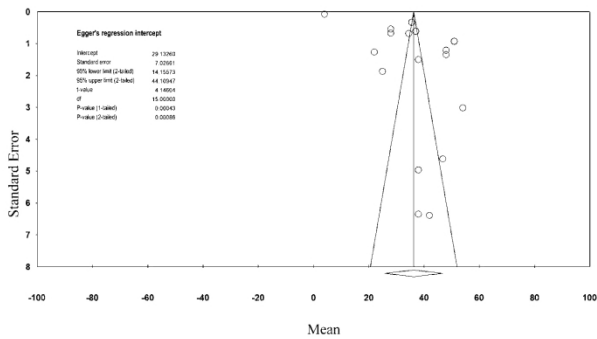

Figure 3B

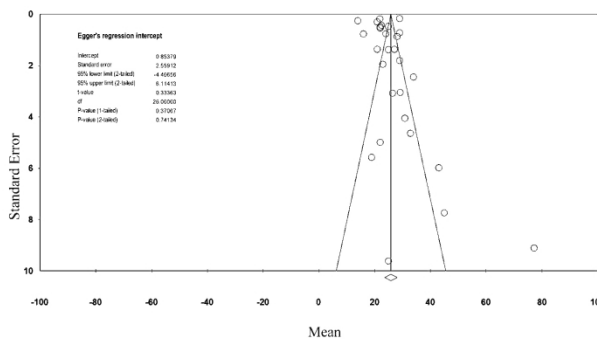

Figure 3C

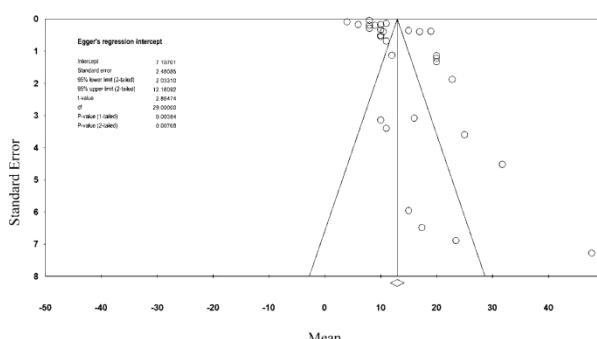

130x242mm (300 x 300 DPI)

1  
2  
3  
4  
5  
6  
7  
8  
9  
10  
11  
12  
13  
14  
15  
16  
17  
18  
19  
20  
21  
22  
23  
24  
25  
26  
27  
28  
29  
30  
31  
32  
33  
34  
35  
36  
37  
38  
39  
40  
41  
42  
43  
44  
45  
46

Supplementary Table S1. A supplementary information of heterogeneity test for overall studies or given subgroup for Table 3.

| Comparison                             | Length of hospital stay, days |                |         |        | ICU length of stay, days |                |         |        | Duration of ICU admission prior to candidemia onset, days |                |         |        | Length of stay prior to ICU admission, days |                |         |        | Overall mortality rate |                |         |        |
|----------------------------------------|-------------------------------|----------------|---------|--------|--------------------------|----------------|---------|--------|-----------------------------------------------------------|----------------|---------|--------|---------------------------------------------|----------------|---------|--------|------------------------|----------------|---------|--------|
|                                        | Degrees of freedom            |                |         |        | Degrees of freedom       |                |         |        | Degrees of freedom                                        |                |         |        | Degrees of freedom                          |                |         |        | Degrees of freedom     |                |         |        |
|                                        | Q                             | I <sup>2</sup> | P-value |        | Q                        | I <sup>2</sup> | P-value |        | Q                                                         | I <sup>2</sup> | P-value |        | Q                                           | I <sup>2</sup> | P-value |        | Q                      | I <sup>2</sup> | P-value |        |
| <b>Overall</b>                         | 16                            | 20197.0        | 99.92   | <0.001 | 27                       | 2690.9         | 99.00   | <0.001 | 30                                                        | 4686.2         | 99.36   | <0.001 | 4                                           | 311.2          | 98.71   | <0.001 | 39                     | 26981.1        | 99.86   | <0.001 |
| <b>Overall optional<sup>abcd</sup></b> | <sup>a</sup> 13               | 850.7          | 98.47   | <0.001 | <sup>b</sup> 25          | 2626.7         | 99.05   | <0.001 | <sup>c</sup> 26                                           | 2649.8         | 99.02   | <0.001 |                                             |                |         |        | <sup>d</sup> 35        | 24273.9        | 99.86   | <0.001 |
| <b>Subgroups</b>                       |                               |                |         |        |                          |                |         |        |                                                           |                |         |        |                                             |                |         |        |                        |                |         |        |
| <b>Type of study</b>                   |                               |                |         |        |                          |                |         |        |                                                           |                |         |        |                                             |                |         |        |                        |                |         |        |
| Prospective                            | 7                             | 568.3          | 98.77   | <0.001 | 12                       | 662.2          | 98.19   | <0.001 | 16                                                        | 1572.3         | 98.98   | <0.001 | 1                                           | 0.9            | 0.35    | <0.001 | 20                     | 13805.2        | 99.86   | <0.001 |
| Retrospective                          | 8                             | 14000.4        | 99.94   | <0.001 | 14                       | 893.2          | 98.43   | <0.001 | 13                                                        | 2670.7         | 99.51   | <0.001 | 2                                           | 28.39          | 92.95   | <0.001 | 18                     | 9479.2         | 99.81   | <0.001 |
| <b>Presence of neutropenia</b>         |                               |                |         |        |                          |                |         |        |                                                           |                |         |        |                                             |                |         |        |                        |                |         |        |
| Neutropenia                            | 7                             | 6119.9         | 99.89   | <0.001 | 8                        | 2297.7         | 99.65   | <0.001 | 11                                                        | 3099.9         | 99.65   | <0.001 | 0                                           | -              | -       | -      | 11                     | 15935.0        | 99.93   | <0.001 |
| Non-neutropenia                        | 1                             | 1.8            | 42.97   | 0.185  | 0                        |                |         | -      | 1                                                         | 0              | 0       | 1      | 0                                           | -              | -       | -      | 2                      | 1388.4         | 99.86   | <0.001 |
| <b>Type of ICU</b>                     |                               |                |         |        |                          |                |         |        |                                                           |                |         |        |                                             |                |         |        |                        |                |         |        |
| ICU                                    | 7                             | 11712.8        | 99.94   | <0.001 | 16                       | 930.6          | 98.28   | <0.001 | 13                                                        | 1589.8         | 99.18   | <0.001 | 1                                           | 4.14           | 75.86   | 0.042  | 23                     | 13807.9        | 99.83   | <0.001 |
| SICU                                   |                               |                |         | -      | 1                        | 0.7            | 0.00    | 0.404  | 2                                                         | 31.2           | 93.60   | <0.001 | 0                                           | -              | -       | -      | 2                      | 1005.5         | 99.80   | <0.001 |
| MICU                                   | 0                             |                |         | -      | 1                        | 6.2            | 83.92   | 0.013- | 1                                                         | 0              | 0       | 1-     | 0                                           | -              | -       | -      | 1                      | 14.3           | 92.99   | <0.001 |
| MICU+SICU                              | 7                             | 776.9          | 99.10   | <0.001 | 6                        | 713.7          | 99.16   | <0.001 | 11                                                        | 1539.5         | 99.29   | <0.001 | 0                                           | -              | -       | -      | 10                     | 8098.2         | 99.88   | <0.001 |

**C. Albicans**

|                 |   |       |       |        |   |      |       |       |   |   |   |   |   |        |       |        |
|-----------------|---|-------|-------|--------|---|------|-------|-------|---|---|---|---|---|--------|-------|--------|
| C. Albicans     | 2 | 114.7 | 98.26 | <0.001 | 2 | 5.79 | 65.45 | 0.055 | 1 | 0 | 0 | 1 | 5 | 1558.5 | 99.68 | <0.001 |
| Non C. Albicans | 1 | 2.262 | 55.78 | 0.133  | 1 | 5.4  | 81.37 | 0.021 | 0 | - | - | - | - | -      | -     | -      |

**Presence of****IC/candidemia**

|            |    |        |       |        |    |        |       |        |    |        |       |        |   |       |       |        |    |         |       |        |
|------------|----|--------|-------|--------|----|--------|-------|--------|----|--------|-------|--------|---|-------|-------|--------|----|---------|-------|--------|
| Candidemia | 13 | 651.6  | 98.01 | <0.001 | 23 | 2620.0 | 99.12 | <0.001 | 24 | 2517.8 | 99.05 | <0.001 | 3 | 302.3 | 99.01 | <0.001 | 32 | 18755.6 | 99.83 | <0.001 |
| IC         | 2  | 2588.9 | 99.92 | <0.001 | 3  | 17.0   | 82.33 | 0.001  | 5  | 1169.4 | 99.57 | <0.001 | 0 | -     | -     | -      | 6  | 3922.9  | 99.85 | <0.001 |

**Region**

|               |   |        |       |        |    |       |       |        |    |        |       |        |   |      |       |        |    |        |       |        |
|---------------|---|--------|-------|--------|----|-------|-------|--------|----|--------|-------|--------|---|------|-------|--------|----|--------|-------|--------|
| Asia          | 8 | 5464.6 | 99.85 | <0.001 | 11 | 738.6 | 98.51 | <0.001 | 11 | 2189.9 | 99.50 | <0.001 | 1 | 1.4  | 26.82 | 0.242  | 16 | 8966.6 | 99.82 | <0.001 |
| Europe        | 3 | 226.5  | 98.68 | <0.001 | 8  | 346.7 | 97.69 | <0.001 | 10 | 907.3  | 98.90 | <0.001 | 2 | 37.9 | 94.72 | <0.001 | 13 | 7933.8 | 99.84 | <0.001 |
| South America | 0 | -      | -     | -      | 0  | -     | -     | -      | 2  | 19.6   | 89.80 | <0.001 | - | -    | -     | -      | 4  | 1960.7 | 99.80 | <0.001 |

Note: Certain subgroups have only 1 study (degree of freedom = 0).

<sup>a</sup> Excluded Yang et al. (2017), Gong et al (2016), Liao et al. (2015), and Guo et al. (2013).

<sup>b</sup> Excluded Yang et al. (2017), Gong et al (2016), Liao et al. (2015), and Guo et al. (2013).

<sup>c</sup> Excluded Yang et al. (2017), Gong et al (2016), Liao et al. (2015), and Hu et al. (2014).

<sup>d</sup> Excluded Yang et al. (2017), Gong et al (2016), Liao et al. (2015), and Hu et al. (2014).

Dash indicates no available.

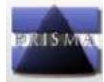

# PRISMA 2009 Checklist

| Section/Topic                      | #  | Checklist Item                                                                                                                                                                                                                                                                                              | Reported on Page # |
|------------------------------------|----|-------------------------------------------------------------------------------------------------------------------------------------------------------------------------------------------------------------------------------------------------------------------------------------------------------------|--------------------|
| <b>TITLE</b>                       |    |                                                                                                                                                                                                                                                                                                             |                    |
| Title                              | 1  | Identify the report as a systematic review, meta-analysis, or both.                                                                                                                                                                                                                                         | 1                  |
| <b>ABSTRACT</b>                    |    |                                                                                                                                                                                                                                                                                                             |                    |
| Structured summary                 | 2  | Provide a structured summary including, as applicable: background; objectives; data sources; study eligibility criteria, participants, and interventions; study appraisal and synthesis methods; results; limitations; conclusions and implications of key findings; systematic review registration number. | 2                  |
| <b>INTRODUCTION</b>                |    |                                                                                                                                                                                                                                                                                                             |                    |
| Rationale                          | 3  | Describe the rationale for the review in the context of what is already known.                                                                                                                                                                                                                              | 5                  |
| Objectives                         | 4  | Provide an explicit statement of questions being addressed with reference to participants, interventions, comparisons, outcomes, and study design (PICOS).                                                                                                                                                  | 6                  |
| <b>METHODS</b>                     |    |                                                                                                                                                                                                                                                                                                             |                    |
| Protocol and registration          | 5  | Indicate if a review protocol exists, if and where it can be accessed (e.g., Web address), and, if available, provide registration information including registration number.                                                                                                                               | N/A                |
| Eligibility criteria               | 6  | Specify study characteristics (e.g., PICOS, length of follow-up) and report characteristics (e.g., years considered, language, publication status) used as criteria for eligibility, giving rationale.                                                                                                      | 6                  |
| Information sources                | 7  | Describe all information sources (e.g., databases with dates of coverage, contact with study authors to identify additional studies) in the search and date last searched.                                                                                                                                  | 6                  |
| Search                             | 8  | Present full electronic search strategy for at least one database, including any limits used, such that it could be repeated.                                                                                                                                                                               | 6                  |
| Study selection                    | 9  | State the process for selecting studies (i.e., screening, eligibility, included in systematic review, and, if applicable, included in the meta-analysis).                                                                                                                                                   | 7                  |
| Data collection process            | 10 | Describe method of data extraction from reports (e.g., piloted forms, independently, in duplicate) and any processes for obtaining and confirming data from investigators.                                                                                                                                  | 7                  |
| Data items                         | 11 | List and define all variables for which data were sought (e.g., PICOS, funding sources) and any assumptions and simplifications made.                                                                                                                                                                       | 8                  |
| Risk of bias in individual studies | 12 | Describe methods used for assessing risk of bias of individual studies (including specification of whether this was done at the study or outcome level), and how this information is to be used in any data synthesis.                                                                                      | 7                  |
| Summary measures                   | 13 | State the principal summary measures (e.g., risk ratio, difference in means).                                                                                                                                                                                                                               | 8                  |
| Synthesis of results               | 14 | Describe the methods of handling data and combining results of studies, if done, including measures of consistency (e.g., $I^2$ ) for each meta-analysis.                                                                                                                                                   | 9                  |

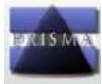

# PRISMA 2009 Checklist

| Section/Topic                 | #  | Checklist Item                                                                                                                                                                                           | Reported on Page # |
|-------------------------------|----|----------------------------------------------------------------------------------------------------------------------------------------------------------------------------------------------------------|--------------------|
| Risk of bias across studies   | 15 | Specify any assessment of risk of bias that may affect the cumulative evidence (e.g., publication bias, selective reporting within studies).                                                             | 10                 |
| Additional analyses           | 16 | Describe methods of additional analyses (e.g., sensitivity or subgroup analyses, meta-regression), if done, indicating which were pre-specified.                                                         | 8                  |
| <b>RESULTS</b>                |    |                                                                                                                                                                                                          |                    |
| Study selection               | 17 | Give numbers of studies screened, assessed for eligibility, and included in the review, with reasons for exclusions at each stage, ideally with a flow diagram.                                          | 10                 |
| Study characteristics         | 18 | For each study, present characteristics for which data were extracted (e.g., study size, PICOS, follow-up period) and provide the citations.                                                             | 10                 |
| Risk of bias within studies   | 19 | Present data on risk of bias of each study and, if available, any outcome level assessment (see item 12).                                                                                                | 34                 |
| Results of individual studies | 20 | For all outcomes considered (benefits or harms), present, for each study: (a) simple summary data for each intervention group (b) effect estimates and confidence intervals, ideally with a forest plot. | 33                 |
| Synthesis of results          | 21 | Present the main results of the review. If meta-analyses done, include for each, confidence intervals and measures of consistency.                                                                       | 28                 |
| Risk of bias across studies   | 22 | Present results of any assessment of risk of bias across studies (see Item 15).                                                                                                                          | 38                 |
| Additional analysis           | 23 | Give results of additional analyses, if done (e.g., sensitivity or subgroup analyses, meta-regression [see Item 16]).                                                                                    | 34                 |
| <b>DISCUSSION</b>             |    |                                                                                                                                                                                                          |                    |
| Summary of evidence           | 24 | Summarize the main findings including the strength of evidence for each main outcome; consider their relevance to key groups (e.g., healthcare providers, users, and policy makers).                     | 38                 |
| Limitations                   | 25 | Discuss limitations at study and outcome level (e.g., risk of bias), and at review-level (e.g., incomplete retrieval of identified research, reporting bias).                                            | 41                 |
| Conclusions                   | 26 | Provide a general interpretation of the results in the context of other evidence, and implications for future research.                                                                                  | 41                 |
| <b>FUNDING</b>                |    |                                                                                                                                                                                                          |                    |
| Funding                       | 27 | Describe sources of funding for the systematic review and other support (e.g., supply of data); role of funders for the systematic review.                                                               | 42                 |

From: Moher D, Liberati A, Tetzlaff J, Altman DG, The PRISMA Group (2009). Preferred Reporting Items for Systematic Reviews and Meta-Analyses: The PRISMA Statement. PLoS Med 6(6): e1000097. doi:10.1371/journal.pmed1000097

For more information, visit: [www.prisma-statement.org](http://www.prisma-statement.org).



# BMJ Open

## The risk of invasive candidiasis with prolonged duration of ICU stay: a systematic review and meta-analysis

|                                 |                                                                                                                                                                                                                                                                                                                                                                                                                      |
|---------------------------------|----------------------------------------------------------------------------------------------------------------------------------------------------------------------------------------------------------------------------------------------------------------------------------------------------------------------------------------------------------------------------------------------------------------------|
| Journal:                        | <i>BMJ Open</i>                                                                                                                                                                                                                                                                                                                                                                                                      |
| Manuscript ID                   | bmjopen-2019-036452.R2                                                                                                                                                                                                                                                                                                                                                                                               |
| Article Type:                   | Original research                                                                                                                                                                                                                                                                                                                                                                                                    |
| Date Submitted by the Author:   | 12-Mar-2020                                                                                                                                                                                                                                                                                                                                                                                                          |
| Complete List of Authors:       | Zhang, Zhidan; the First Hospital of China Medical University, Department of Critical Care Medicine<br>Zhu, Ran; the First Hospital of China Medical University, Department of Critical Care Medicine<br>Luan, Zhenggang; the First Hospital of China Medical University, Department of Critical Care Medicine<br>Ma, Xiaochun; the First Hospital of China Medical University, Department of Critical Care Medicine |
| <b>Primary Subject Heading</b>: | Intensive care                                                                                                                                                                                                                                                                                                                                                                                                       |
| Secondary Subject Heading:      | Intensive care                                                                                                                                                                                                                                                                                                                                                                                                       |
| Keywords:                       | ACCIDENT & EMERGENCY MEDICINE, INTENSIVE & CRITICAL CARE, Adult intensive & critical care < ANAESTHETICS                                                                                                                                                                                                                                                                                                             |
|                                 |                                                                                                                                                                                                                                                                                                                                                                                                                      |

SCHOLARONE™  
Manuscripts



I, the Submitting Author has the right to grant and does grant on behalf of all authors of the Work (as defined in the below author licence), an exclusive licence and/or a non-exclusive licence for contributions from authors who are: i) UK Crown employees; ii) where BMJ has agreed a CC-BY licence shall apply, and/or iii) in accordance with the terms applicable for US Federal Government officers or employees acting as part of their official duties; on a worldwide, perpetual, irrevocable, royalty-free basis to BMJ Publishing Group Ltd ("BMJ") its licensees and where the relevant Journal is co-owned by BMJ to the co-owners of the Journal, to publish the Work in this journal and any other BMJ products and to exploit all rights, as set out in our [licence](#).

The Submitting Author accepts and understands that any supply made under these terms is made by BMJ to the Submitting Author unless you are acting as an employee on behalf of your employer or a postgraduate student of an affiliated institution which is paying any applicable article publishing charge ("APC") for Open Access articles. Where the Submitting Author wishes to make the Work available on an Open Access basis (and intends to pay the relevant APC), the terms of reuse of such Open Access shall be governed by a Creative Commons licence – details of these licences and which [Creative Commons](#) licence will apply to this Work are set out in our licence referred to above.

Other than as permitted in any relevant BMJ Author's Self Archiving Policies, I confirm this Work has not been accepted for publication elsewhere, is not being considered for publication elsewhere and does not duplicate material already published. I confirm all authors consent to publication of this Work and authorise the granting of this licence.

1  
2  
3 **The risk of invasive candidiasis with prolonged duration of ICU stay: a systematic**  
4 **review and meta-analysis**  
5  
6  
7  
8  
9

10  
11 **Running title:** Duration of ICU prior to candidemia  
12

13  
14 Zhidan Zhang MD, Ran Zhu MD, Zhenggang Luan MD, Xiaochun Ma MD  
15

16  
17 Department of Critical Care Medicine, the First Hospital of China Medical University,  
18  
19 Shenyang 110001, Liaoning, China  
20  
21

22  
23  
24  
25 **Corresponding author:** Xiaochun Ma  
26

27  
28 Department of Critical Care Medicine, the First Hospital of China Medical University,  
29  
30 Shenyang 110001, Liaoning, China  
31  
32

33  
34 Tel: 008613840192939;  
35

36  
37 E-mail: [XCMA2972@sina.com](mailto:XCMA2972@sina.com)  
38  
39  
40  
41  
42  
43  
44  
45  
46  
47  
48  
49  
50  
51  
52  
53  
54  
55  
56  
57  
58  
59  
60

## ABSTRACT

**Objective:** This study aimed to evaluate the duration of intensive care unit (ICU) stay prior to onset of invasive candidiasis (IC)/candidemia.

**Design:** Systematic review and meta-analysis.

**Data Sources:** Pubmed, Cochrane, Embase, and Web of Science databases were searched through June, 2019 to identify relevant studies.

**Eligibility Criteria:** Adult patients who had been admitted to the ICU and developed an invasive candidiasis infection.

**Data extraction and synthesis:** The following data were extracted from each article: the length of hospital stay, the length of ICU stay, duration of ICU admission prior to the candidemia onset, percentages of patients who received antibiotics and duration of their antibiotic therapy prior to candidemia onset, and overall mortality. In addition to the traditional meta-analyses, meta-regression was performed to explore possible mediators which might have contributed to the heterogeneity.

**Results:** The mean age of patients ranged from 28 to 76 years across selected studies. The pooled mean duration of ICU admission before onset of candidemia was 12.9 days (95% confidence interval [CI]: 11.7 – 14.2). The pooled mean duration of hospital stay was 36.3±5.3 days (95% CI: 25.8 – 46.7) and the pooled mean mortality rate was 49.3±2.2% (95% CI: 45.0% – 53.5%). There was no significant difference in duration of hospital stay ( $P = 0.528$ ) or overall mortality ( $P=0.111$ ), but a significant difference was observed in the mean length of ICU stay (2.8 days,  $P < 0.001$ ) between patients with and without *C. albicans*. Meta-regression analysis found that South American patients had longer duration of ICU admission prior to candidemia onset than patients elsewhere, while those in Asia had the shortest duration.

1  
2  
3 **Conclusions:** Patients with IC are associated with longer ICU stay, with the shortest  
4 duration of ICU admission prior to the candidemia onset in Asia. This shows a more  
5 proactive strategy for the diagnosis of IC should be considered in caring ICU patients.  
6  
7  
8  
9

10  
11  
12 **KEYWORDS:** Invasive candidiasis, candidemia, intensive care unit, length of stay,  
13 antibiotic, mortality  
14  
15  
16  
17  
18  
19  
20  
21  
22  
23  
24  
25  
26  
27  
28  
29  
30  
31  
32  
33  
34  
35  
36  
37  
38  
39  
40  
41  
42  
43  
44  
45  
46  
47  
48  
49  
50  
51  
52  
53  
54  
55  
56  
57  
58  
59  
60

For peer review only

### Strengths and limitations of this study

- This meta-analysis is one of few that investigated the association of IC with the length of ICU stay, using data published worldwide and adhering to the PRISMA guideline.
- Extensive subgroup analyses were performed and meta-regression was made to examine possible causes of heterogeneity in the results.
- Although this meta-analysis was performed methodically, it lacked a pre-specified protocol and preliminary registration.
- Heterogeneity exists in some subgroup and overall analyses.
- Due to a lack of sufficient published data, relationship between prolonged exposure to broad-spectrum antibiotics and ICU-acquired candidemia could not be assessed.

## INTRODUCTION

*Candida* species account for approximately 70% to 90% of invasive fungal infections and are the most frequent cause of fungal infections in patients admitted to the intensive care unit (ICU) [1]. Invasive candidiasis (IC) is associated with a high mortality rate (range: 40% to 60%) [1, 2]. Over recent decades, the incidence of IC has been gradually increasing in most regions [3], ranging from 0.5 to 32 cases per 1,000 ICU admissions. It has been found that there is a significant difference in the incidence of IC among several countries in Latin America and North America; however, data from Asia-Pacific countries are still relatively rare [4]. Candidemia has been described as the most common manifestation of IC, and the further infection of the liver, spleen, heart valves, or eye might also occur after a bloodstream infection [5]. In the past, the main *Candida* species isolated from patients with IC was *C. albicans*. However, non-*C. albicans* species has seen a rising proportion and now account for approximately 50% of all cases of IC in the past two decades [1,6-8].

Diagnosis and management of IC remains challenging for physicians in the ICU [1, 2]. The early initiation of empiric antifungal treatment has been demonstrated to improve the prognosis of invasive candidiasis [2, 9]. However, there is difficulty in the diagnosis of IC which can delay timely antifungal treatment [2, 10]. Blood culture remains the gold standard for the diagnosis of invasive candidiasis, but its sensitivity is variable (21% to 71%) [11].

In order to improve the diagnosis of IC, and to identify the patients who may best benefit from prophylactic, preemptive, or empirical therapy prior to, or at an early stage of ICU admission several methods in predicting the development of IC based on their associated risk factors have been developed [12, 13]. The risk factors in the

1  
2  
3 various predictive models include broad-spectrum antibiotic use, central venous  
4 catheter placement, total parenteral nutrition, hemodialysis (days 1–3 in the ICU), any  
5 surgery, immunosuppressive use, pancreatitis prior to ICU admission, and steroid use.  
6  
7 However, different risk factors are included in different predictive models. In addition,  
8 potential risk factors such as *Candida* colonization [14] and mechanical ventilation  
9 [15] have not been included in these models.

10  
11  
12  
13  
14  
15  
16  
17 Long-term ICU stay has been reported as a risk factor for IC [11, 14-16]. Only a  
18 few studies have examined the interval between ICU admission or initiation of  
19 broad-spectrum antibiotics and the diagnosis of IC. However, the specific duration of  
20 long-term ICU stays and the prolonged use of broad-spectrum antibiotics are often  
21 arbitrarily defined and inconsistent among studies [6, 12, 15, 17-19]. Furthermore, a  
22 large majority of severe candidiasis cases are caused by endogenous colonization.  
23 This may be the primary reason for causing a delay of 7 to 10 days between exposure  
24 to risk factors and the development of IC [20].  
25  
26  
27  
28  
29  
30  
31  
32  
33  
34

35 Thus, the objective of this systematic review was to evaluate several possible risk  
36 factors associated with the development of candidemia, including the length of  
37 hospitalization and ICU stay, as well as regional difference in those factors.  
38  
39  
40  
41  
42  
43  
44

## 45 **METHODS**

### 46 **Search strategy**

47  
48  
49  
50 The study was performed in accordance with guidance from the Preferred  
51 Reporting Items for Systematic Reviews and Meta-Analyses (PRISMA). PubMed,  
52 Cochrane, Embase, and Web of Science databases were searched from the inception  
53 through June, 2019 using the following terms: candidiasis, candidemia, intensive care  
54 unit or ICU, and risk factors (Supplementary table S1). Studies identified by the  
55  
56  
57  
58  
59  
60



1  
2  
3 search strategy were reviewed for inclusion and data were extracted by two  
4  
5 independent reviewers. Where there was uncertainty regarding study eligibility, a  
6  
7 third reviewer was consulted. A flow chart of the study selection is shown in Figure 1.  
8  
9

### 10 11 12 **Study selection criteria**

13  
14 Randomized controlled trials (RCTs), cohort studies, case-controlled, and  
15  
16 cross-sectional studies were included. All studies included adult patients who were  
17  
18 critically ill, who had been admitted to the ICU, and who were tested positive for  
19  
20 *Candida* species using blood culture analyses. Studies had to have reported  
21  
22 quantitative outcomes of interest and no author was contacted. Letters, comments,  
23  
24 editorials, case reports, proceedings, personal communications, and case series were  
25  
26 excluded. Studies in which patients were diagnosed with candidiasis prior to ICU  
27  
28 admission were excluded. Studies that did not evaluate the incidence of candidiasis as  
29  
30 a primary objective, or that were not designed to evaluate risk factors/prognostic  
31  
32 factors of patients with candidiasis were also excluded.  
33  
34  
35  
36  
37  
38  
39

### 40 **Data extraction**

41  
42 The following information / data was extracted from studies that met the  
43  
44 inclusion criteria: the name of the first author, year of publication, country, study  
45  
46 design, type of ICU, number of participants in each group, participants' age and  
47  
48 gender, the presence of *C. albicans*, the presence of neutropenia, and antifungal  
49  
50 treatment (especially the use of broad-spectrum antibiotics). The following data were  
51  
52 also extracted from each article: length of stay in hospital/ICU, length of stay prior to  
53  
54 ICU admission, duration of ICU stay prior to candidemia onset, antibiotic therapy  
55  
56 prior to candidemia onset, duration of antibiotic therapy prior to candidemia onset,  
57  
58  
59  
60

1  
2  
3 and overall mortality.  
4  
5  
6

### 7 8 **Quality assessment** 9

10 We used the Risk of Bias In Non-randomized Studies of Interventions  
11 (ROBINS-I) tool to assess the quality of the included studies [21]. ROBINS-I is based  
12 on the Cochrane RoB tool and is suited for evaluating non-randomized studies that  
13 compare the health effects of different interventions. ROBINS-I covers 7 different  
14 bias domains: bias due to confounding, bias in selection of participants into the study,  
15 bias in classification of interventions, bias due to deviations from intended  
16 interventions, bias due to missing data, bias in measurement of outcomes, and bias in  
17 the selection of reported results [22-23]. In this systematic review, 2 independent  
18 reviewers performed the quality assessment, with a third reviewer consulted for any  
19 uncertainty.  
20  
21  
22  
23  
24  
25  
26  
27  
28  
29  
30  
31  
32  
33  
34  
35  
36

### 37 38 **Patient and public involvement** 39

40 No patients and/or members of the public were involved in the process of  
41 designing, planning and completing this study.  
42  
43  
44

### 45 46 **Statistical analysis** 47

48 Study characteristics were summarized as mean±standard deviations (SD), mean  
49 (range), median (range), or median (IQR) for age or duration of antifungal treatment,  
50 and percentage (%) for sex, rate of *C. albicans* isolated, neutropenia, and antifungal  
51 treatment used in each study.  
52  
53  
54  
55  
56

57 Clinical outcomes, including the length of hospital stay, length of ICU stay,  
58 length of hospital stay prior to ICU admission, duration of ICU admission prior to  
59  
60

1  
2  
3 candidemia onset, and duration of antibiotic therapy prior to candidemia onset were  
4 represented as mean (range: [min. – max.]), median (range), or median (IQR  
5 [interquartile range: 1<sup>st</sup> – 3<sup>rd</sup> quartiles]). The rate of antibiotic therapy prior to  
6 candidemia onset and overall mortality rate were presented as percentages. All  
7 clinical outcomes were further summarized for subgroups of studies (with studies'  
8 number  $\geq 2$ ). Types of study, presence of neutropenia, types of ICU, type of *Candida*  
9 isolated, presence of IC/candidemia, and regions/countries were listed for comparison  
10 as well. Meta-regression analyses were performed to investigate statistical importance  
11 of potential moderators. Quantitative data reported with median (range) and/or median  
12 interquartile range (IQR) were converted to mean  $\pm$  SD, according to the method  
13 described by Wan et al. [24]  
14  
15  
16  
17  
18  
19  
20  
21  
22  
23  
24  
25  
26  
27  
28

29 The outcomes selected for the analysis were the length of hospital stay, the  
30 length of ICU stay, duration of ICU admission prior to candidemia onset, and overall  
31 mortality between patients who were diagnosed with *C. albicans* and those with  
32 non-*C. albicans*. The effect size was calculated as mean difference with 95% CI  
33 (Lower, Upper limit) in length of days, or rate ratio with 95% CI in overall mortality  
34 for each given study, and then a pooling effect was derived thereafter. A difference in  
35 means of length in days  $< 0$  (or rate ratio of overall mortality rate  $> 1$ ) indicated the  
36 pooling effect favoring non- *C. albicans* subgroup, whereas difference in means of  
37 length in days  $> 0$  (or rate ratio of overall mortality rate  $< 1$ ) indicated the pooling  
38 effect favoring *C. albicans* subgroup. A difference in means of length in days = 0 (or  
39 rate ratio of overall mortality rate = 1) indicated that the pooling effect was similar  
40 between *C. albicans* and non-*C. albicans* subgroups. Heterogeneity was evaluated  
41 using a  $\chi^2$ -based Cochran's Q statistic and  $I^2$ . The random effect model  
42 (DerSimonian-Laird method) and meta-regression analyses with potential moderators  
43  
44  
45  
46  
47  
48  
49  
50  
51  
52  
53  
54  
55  
56  
57  
58  
59  
60

1  
2  
3 were used for the meta-analysis if either Q statistic with P values < 0.10 or  $I^2 > 50\%$ ;  
4  
5 otherwise, a fixed effect model (Mantel-Haenszel method) was used instead. For the  
6  
7 Q statistic, P values < 0.10 were considered statistically significant for heterogeneity.  
8  
9 For the  $I^2$  statistic, heterogeneity was assessed as follows: no heterogeneity ( $I^2 = 0 -$   
10  
11  $25\%$ ), moderate heterogeneity ( $I^2 = 25 - 50\%$ ), large heterogeneity ( $I^2 = 50 - 75\%$ ), and  
12  
13 extreme heterogeneity ( $I^2 = 75 - 100\%$ ). A two-sided P value of <0.05 was considered  
14  
15 statistically significant.  
16  
17

18  
19 Countries were grouped based on their continents, but since meta-analysis of this  
20  
21 particular topic has not yet been seen in China, research articles from China will be  
22  
23 separately examined and discussed.  
24  
25

26 The publication bias was assessed using the funnel plot with Egger's test and  
27  
28 Classical fail-safe N test for all enrolled studies (except for subgroups). The absence  
29  
30 of publication bias was indicated by the data points forming a symmetric  
31  
32 funnel-shaped distribution and a 1-tailed significance level of  $P > 0.05$  in an Egger's  
33  
34 test.[25] All analyses were performed using Comprehensive Meta-Analysis statistical  
35  
36 software, version 3.3.070 (Biostat, Englewood, NJ, USA).  
37  
38  
39  
40  
41  
42

## 43 **RESULTS**

### 44 **Literature search results**

45  
46 A total of 1875 articles were retrieved from databases, and 1800 articles were  
47  
48 excluded after their titles and abstracts were screened based on the inclusion/exclusion  
49  
50 criteria (Figure 1). Seventy-five articles underwent full-text review, and 34 articles  
51  
52 were excluded for having irrelevant objectives or study designs (n=19), containing  
53  
54 patients in neonatal or pediatric intensive care unit (n=5), not having invasive  
55  
56  
57  
58  
59  
60

1  
2  
3 candidiasis (n=4), and not reporting outcomes of interest (n=6). The remaining 41  
4  
5 articles were included in the systematic review and meta-analysis.  
6  
7  
8  
9

### 10 **Study characteristics**

11  
12  
13 Characteristics of the 41 studies are summarized in Table 1 and Table 2 [14-16, 26-29,  
14  
15 30-63]. A total of 10,692 patients were included in those studies, with the number of  
16  
17 patients in each study ranging from 12 to 1,400. Mean age of the patients ranged from  
18  
19 28 to 76 years. Majority of the patients were males (range: 20% to 75.9%). These  
20  
21 studies were conducted in different countries, with 19 in Europe, 14 in Asia, 1 in the  
22  
23 US, 4 in South America, 2 in Australia and one multinational study (Australia,  
24  
25 Belgium, Greece, Brazil).  
26  
27  
28  
29  
30  
31  
32  
33  
34  
35  
36  
37  
38  
39  
40  
41  
42  
43  
44  
45  
46  
47  
48  
49  
50  
51  
52  
53  
54  
55  
56  
57  
58  
59  
60

1  
2  
3  
4  
5  
6  
7  
8  
9  
10  
11  
12  
13  
14  
15  
16  
17  
18  
19  
20  
21  
22  
23  
24  
25  
26  
27  
28  
29  
30  
31  
32  
33  
34  
35  
36  
37  
38  
39  
40  
41  
42  
43  
44  
45  
46

**Table 1. Characteristics of studies included in this systematic review**

| Studies<br>1 <sup>st</sup> Author<br>(year) | Country | Study<br>design                            | Type of ICU | Total<br>IC and<br>Candidemia<br>number of<br>patients | No. of<br>patients | Age<br>(years)           | Male<br>(%) | <i>C.Albica</i><br><i>ns</i><br>isolated<br>(%) | Neutropen<br>ia (%) | Antifungal treatment        |                                                                                                                                                                  |
|---------------------------------------------|---------|--------------------------------------------|-------------|--------------------------------------------------------|--------------------|--------------------------|-------------|-------------------------------------------------|---------------------|-----------------------------|------------------------------------------------------------------------------------------------------------------------------------------------------------------|
|                                             |         |                                            |             |                                                        |                    |                          |             |                                                 |                     | Duration<br>of<br>treatment | Antifungal treatment used                                                                                                                                        |
| Zhao H (2018)<br>[51]                       | China   | retrospective cohort                       | ICU         | 95                                                     | 95                 | 69.3±16.5                | 57.9%       | 59                                              | —                   | —                           | 17.90%                                                                                                                                                           |
| Ding R (2018)<br>[52]                       | China   | retrospective cohort                       | ICU         | 72                                                     | 72                 | 62.5<br>(49.8,<br>77.0)§ | 62.5%       | 15                                              | —                   | —                           | Fluconazole 30.6%<br>Voriconazole 9.7%<br>Echinocandin 44.4%                                                                                                     |
| Yang et al.<br>(2017) [26]                  | China   | Retrospective cohort study<br>(China-SCAN) | ICU         | 306                                                    | 105                | 56.9<br>(19.9)§          | 64.8%       | 47.7                                            | 1.9%                | —                           | Fluconazole (39.3%)<br>Caspofungin(21.3%)<br>Voriconazole (19.1%)<br>Micafungin(10.1%)<br>Itraconazole(5.6%)<br>Amphotericin B (3.4%)<br>Combined therapy (1.1%) |
|                                             |         |                                            |             |                                                        | 201                | 64.0<br>(19.7)§          | 70.6%       | 36.1                                            | 1.5%                | —                           | Fluconazole (36.9%)<br>Caspofungin(25.1%)<br>Voriconazole (17.9%)<br>Micafungin(7.8%)<br>Itraconazole(9.5%)<br>Amphotericin B (1.7%)<br>Combined therapy (1.1%)  |



1  
2  
3  
4  
5  
6  
7  
8  
9  
10  
11  
12  
13  
14  
15  
16  
17  
18  
19  
20  
21  
22  
23  
24  
25  
26  
27  
28  
29  
30  
31  
32  
33  
34  
35  
36  
37  
38  
39  
40  
41  
42  
43  
44  
45  
46

|                             |           |                                        |                            |       |                                                      |      |                  |      |      |      |                    |                                                             |
|-----------------------------|-----------|----------------------------------------|----------------------------|-------|------------------------------------------------------|------|------------------|------|------|------|--------------------|-------------------------------------------------------------|
| Gong et al. (2016) [47]     | China     | Prospective, cohort study (China-SCAN) | MICU, SICU, Integrated ICU | 306   | Candidemia ( <i>C. albicans</i> )                    | 98   | 62.2±17.3        | 62.2 | 100  | 3.1% | 12.85 days         | Triazole (64.7%)<br>Echinocandin (31.8%)<br>Polyenes (0%)   |
|                             |           |                                        |                            |       | Candidemia (Non- <i>C. albicans</i> )                | 146  | 61.4±21.4        | 72.6 | —    | 1.4% | 20.4 days          | Triazole (62.8%)<br>Echinocandin (34.1%)<br>Polyenes (2.3%) |
| Playford EG (2016) [57]     | Australia | prospective cohort                     | MICU, SICU                 | 6,714 | ICU-acquired IC                                      | 96   | —                | —    | 66   | —    | —                  | —                                                           |
|                             |           |                                        |                            |       | Control (no IC)                                      | 6618 | —                | —    | —    | —    | —                  | —                                                           |
| Pinhati HM (2016) [58]      | Brazil    | cross-sectional                        | ICU                        | 40    | fluconazole-resistant <i>C. parapsilosis</i> (FRCP)  | 21   | 70 (23–91)†      | 66.7 | —    | —    | —                  | any: (33.3)<br>fluconazole: (19.0)                          |
|                             |           |                                        |                            |       | fluconazole-susceptible <i>Candida</i> species (FSC) | 19   | 76 (35–90)†      | 57.9 | —    | —    | —                  | any: (15.8)<br>fluconazole: (15.8)                          |
| Aguilar et al. (2015) [15]  | Spain     | Prospective cohort study               | SICU                       | 22    | IC                                                   | 22   | 66 (53.7–74.2) § | 72.7 | 59.1 | —    | 10 (5.0–16.5) days | Echinocandins (86.4%)<br>Fluconazole (13.6%)                |
| Fochtman et al. (2015) [27] | Austria   | Retrospective cohort study             | Burn ICU                   | 174   | Candidemia                                           | 20   | 39 (17–88) †     | 60%  | 60   | —    | —                  | Triazoles (70%)                                             |
|                             |           |                                        |                            |       | Control                                              | 154  | 58 (17–94) †     | 61%  | —    | —    | —                  | Echinocandins (30%)                                         |



|    |                                |                        |                                       |                     |           |                                        |      |             |       |      |      |                  |                                                                                               |
|----|--------------------------------|------------------------|---------------------------------------|---------------------|-----------|----------------------------------------|------|-------------|-------|------|------|------------------|-----------------------------------------------------------------------------------------------|
| 1  |                                |                        |                                       |                     |           |                                        |      |             |       |      |      |                  |                                                                                               |
| 2  |                                |                        |                                       |                     |           |                                        |      |             |       |      |      |                  |                                                                                               |
| 3  |                                |                        |                                       |                     |           |                                        |      |             |       |      |      |                  |                                                                                               |
| 4  |                                |                        |                                       |                     |           |                                        |      |             |       |      |      |                  |                                                                                               |
| 5  | Klingsporet al.(2015) [28]     | 14 countries in Europe | Prospective cohort study              | SICU                | 807       | IC                                     | 779  | 63(0–91)†   | 62.5% | 54   | —    | —                | Fluconazole (60%)<br>Caspofungin (18.7%)<br>Amphotericin B (13%)<br>Voriconazole (4.8%)       |
| 6  |                                |                        |                                       |                     |           |                                        |      |             |       |      |      |                  |                                                                                               |
| 7  |                                |                        |                                       |                     |           |                                        |      |             |       |      |      |                  |                                                                                               |
| 8  |                                |                        |                                       |                     |           |                                        |      |             |       |      |      |                  |                                                                                               |
| 9  |                                |                        |                                       |                     |           |                                        |      |             |       |      |      |                  |                                                                                               |
| 10 | Chakrabarti et al. (2015) [29] | India                  | Prospective cohort study              | MICU, SICU          | 1400      | Candidemia                             | 1400 | 49.7 ± 17.7 | —     | 20.9 | 1.3% | 9.0 (5-15)§ days | Azoles (72.0%)<br>Echinocandins (18.3%)<br>Amphotericin B (14.4%)                             |
| 11 |                                |                        |                                       |                     |           |                                        |      |             |       |      |      |                  |                                                                                               |
| 12 |                                |                        |                                       |                     |           |                                        |      |             |       |      |      |                  |                                                                                               |
| 13 |                                |                        |                                       |                     |           |                                        |      |             |       |      |      |                  |                                                                                               |
| 14 | Liao et al. (2015) [14]        | China                  | Prospective cohort study (China-SCAN) | MICU, SICU, Mix ICU | 306       | Flu-S                                  | 129  | 62.4±19.5   | 68.2% | 60.5 | 3.1% | —                | Monoantifungaltherapy (64.5%)<br>Fungal drug adjustment (35.7%)<br>Completely improved(34.6%) |
| 15 |                                |                        |                                       |                     |           |                                        |      |             |       |      |      |                  |                                                                                               |
| 16 |                                |                        |                                       |                     |           |                                        |      |             |       |      |      |                  |                                                                                               |
| 17 |                                |                        |                                       |                     |           |                                        |      |             |       |      |      |                  |                                                                                               |
| 18 |                                |                        |                                       |                     |           |                                        |      |             |       |      |      |                  |                                                                                               |
| 19 |                                |                        |                                       |                     |           |                                        |      |             |       |      |      |                  |                                                                                               |
| 20 |                                |                        |                                       |                     |           |                                        |      |             |       |      |      |                  |                                                                                               |
| 21 |                                |                        |                                       |                     |           |                                        |      |             |       |      |      |                  |                                                                                               |
| 22 |                                |                        |                                       |                     |           |                                        |      |             |       |      |      |                  |                                                                                               |
| 23 |                                |                        |                                       |                     |           |                                        |      |             |       |      |      |                  |                                                                                               |
| 24 |                                |                        |                                       |                     |           |                                        |      |             |       |      |      |                  |                                                                                               |
| 25 |                                |                        |                                       |                     |           |                                        |      |             |       |      |      |                  |                                                                                               |
| 26 |                                |                        |                                       |                     |           |                                        |      |             |       |      |      |                  |                                                                                               |
| 27 | Kautzky S (2015) [59]          | Austria                | prospective cohort                    | MICU                | 65        | IC (invasive <i>Candida</i> infection) | 5    | 28.2 ± 97   | 20%   | —    | 0%   | 15.40 ± 13.9     | 100%                                                                                          |
| 28 |                                |                        |                                       |                     |           |                                        |      |             |       |      |      |                  |                                                                                               |
| 29 |                                |                        |                                       |                     |           |                                        |      |             |       |      |      |                  |                                                                                               |
| 30 |                                |                        |                                       |                     |           |                                        |      |             |       |      |      |                  |                                                                                               |
| 31 |                                |                        |                                       |                     |           |                                        |      |             |       |      |      |                  |                                                                                               |
| 32 |                                |                        |                                       |                     |           |                                        |      |             |       |      |      |                  |                                                                                               |
| 33 |                                |                        |                                       |                     |           |                                        |      |             |       |      |      |                  |                                                                                               |
| 34 |                                |                        |                                       |                     |           |                                        |      |             |       |      |      |                  |                                                                                               |
| 35 |                                |                        |                                       |                     |           |                                        |      |             |       |      |      |                  |                                                                                               |
| 36 |                                |                        |                                       |                     |           |                                        |      |             |       |      |      |                  |                                                                                               |
| 37 | Karacaer et al. (2014) [31]    | Turkey                 | Prospective cohort study              | ICU service         | burn 2362 | IC                                     | 63   | 70.2 ± 19.5 | 54%   | 64   | —    | —                | —                                                                                             |
| 38 |                                |                        |                                       |                     |           |                                        |      |             |       |      |      |                  |                                                                                               |
| 39 |                                |                        |                                       |                     |           |                                        |      |             |       |      |      |                  |                                                                                               |
| 40 |                                |                        |                                       |                     |           |                                        |      |             |       |      |      |                  |                                                                                               |
| 41 |                                |                        |                                       |                     |           |                                        |      |             |       |      |      |                  |                                                                                               |
| 42 |                                |                        |                                       |                     |           |                                        |      |             |       |      |      |                  |                                                                                               |
| 43 |                                |                        |                                       |                     |           |                                        |      |             |       |      |      |                  |                                                                                               |
| 44 |                                |                        |                                       |                     |           |                                        |      |             |       |      |      |                  |                                                                                               |
| 45 |                                |                        |                                       |                     |           |                                        |      |             |       |      |      |                  |                                                                                               |
| 46 |                                |                        |                                       |                     |           |                                        |      |             |       |      |      |                  |                                                                                               |

1  
2  
3  
4  
5  
6  
7  
8  
9  
10  
11  
12  
13  
14  
15  
16  
17  
18  
19  
20  
21  
22  
23  
24  
25  
26  
27  
28  
29  
30  
31  
32  
33  
34  
35  
36  
37  
38  
39  
40  
41  
42  
43  
44  
45  
46

(14-95)

|                            |        |                                       |     |       |                        |      |              |        |       |      |                  |                                                                                                                                                                    |
|----------------------------|--------|---------------------------------------|-----|-------|------------------------|------|--------------|--------|-------|------|------------------|--------------------------------------------------------------------------------------------------------------------------------------------------------------------|
| Colombo et al. (2014) [32] | Brazil | Retrospective cohort study            | ICU | 1,392 | Candidemia             | 647  | 66 (18-97) † | 50.7   | 44    | 2.5% | —                | Amphotericin B (period 1:27.8%; period 2: 13.4%)<br>Echinocandins(period 1: 5.9%; period 2: 18.0%)                                                                 |
| Hu et al.(2014) [48]       | China  | Prospective cohort study (China-SCAN) | ICU | 294   | CRCBSI                 | 29   | 69.4 ± 19.1  | 75.9 % | 28.6  | —    | 19.0 ± 13.3 days | Fluconazole (39.3%)<br>Caspofungin(25.0%)<br>Voriconazole(14.3%)<br>Miconazole (10.70%)<br>Itraconazole(10.7%)<br>Amphotericin B (0%)<br>Two-drug combination (0%) |
|                            |        |                                       |     |       |                        |      |              |        |       |      |                  | Non-CRCBSI                                                                                                                                                         |
| Lortholary O (2014) [60]   | France | prospective cohort                    | ICU | 2507  | ICU-aquired candidemia | 1206 | 60 ± 17      | 62.0 % | 57.10 | —    | —                | Fluconazole(55.4 %)<br>Echinocandins(26.2 %)<br>Others (including combination)(12.6 %)                                                                             |
|                            |        |                                       |     |       |                        |      |              |        |       |      |                  | non-ICU aquired candidemia                                                                                                                                         |

|    |                                 |         |                                        |                                            |       |                         |     |                      |        |      |      |                  |                                                                                    |  |
|----|---------------------------------|---------|----------------------------------------|--------------------------------------------|-------|-------------------------|-----|----------------------|--------|------|------|------------------|------------------------------------------------------------------------------------|--|
| 1  |                                 |         |                                        |                                            |       |                         |     |                      |        |      |      |                  |                                                                                    |  |
| 2  |                                 |         |                                        |                                            |       |                         |     |                      |        |      |      |                  |                                                                                    |  |
| 3  |                                 |         |                                        |                                            |       |                         |     |                      |        |      |      |                  |                                                                                    |  |
| 4  |                                 |         |                                        |                                            |       |                         |     |                      |        |      |      |                  |                                                                                    |  |
| 5  | Yapar N                         | Turkey  | retrospective cohort                   | ICU                                        | 1076  | Candidemia              | 66  | 54.4 ± 23.9          | 53%    | 53   | —    | —                | 9%                                                                                 |  |
| 6  | (2014) [61]                     |         |                                        |                                            |       |                         |     |                      |        |      |      |                  |                                                                                    |  |
| 7  |                                 |         |                                        |                                            |       |                         |     |                      |        |      |      |                  |                                                                                    |  |
| 8  |                                 |         |                                        |                                            |       |                         |     |                      |        |      |      |                  |                                                                                    |  |
| 9  |                                 |         |                                        |                                            |       |                         |     |                      |        |      |      |                  |                                                                                    |  |
| 10 |                                 |         |                                        |                                            |       |                         |     |                      |        |      |      |                  |                                                                                    |  |
| 11 |                                 |         |                                        |                                            |       |                         |     |                      |        |      |      |                  |                                                                                    |  |
| 12 |                                 |         |                                        |                                            |       |                         |     |                      |        |      |      |                  |                                                                                    |  |
| 13 | Guo et al.(2013) [49]           | China   | Prospective cohort study (China-SCA N) | MICU SICU General Emergency Neurologic ICU | 306   | Candidemia              | 306 | 61.5±20.0            | 68.6 % | 40.2 | 1.6% | 14 (0-104)† days | Fluconazole (37.7%)<br>Caspofungin (23.9%)<br>Voriconazole (18.3%)                 |  |
| 14 |                                 |         |                                        |                                            |       |                         |     |                      |        |      |      |                  |                                                                                    |  |
| 15 |                                 |         |                                        |                                            |       |                         |     |                      |        |      |      |                  |                                                                                    |  |
| 16 |                                 |         |                                        |                                            |       |                         |     |                      |        |      |      |                  |                                                                                    |  |
| 17 |                                 |         |                                        |                                            |       |                         |     |                      |        |      |      |                  |                                                                                    |  |
| 18 | Giri S (2013) [30]              | India   | prospective cohort                     | ICU                                        | 5,976 | Candidemia              | 39  | 35.14 (3days-79 % y) | 61.5 % | 4    |      |                  |                                                                                    |  |
| 19 |                                 |         |                                        |                                            |       |                         |     |                      |        |      |      |                  |                                                                                    |  |
| 20 |                                 |         |                                        |                                            |       |                         |     |                      |        |      |      |                  |                                                                                    |  |
| 21 |                                 |         |                                        |                                            |       |                         |     |                      |        |      |      |                  |                                                                                    |  |
| 22 |                                 |         |                                        |                                            |       |                         |     |                      |        |      |      |                  |                                                                                    |  |
| 23 | Tortorano et al.(2012) [33]     | Italy   | Prospective cohort study               | MICU, SICU                                 | 384   | Candidemia              | 276 | —                    | —      | 60.9 | —    | —                | Fluconazole (63%)<br>Amphotericin B (22%)<br>Caspofungin (7%)<br>Voriconazole (6%) |  |
| 24 |                                 |         |                                        |                                            |       |                         |     |                      |        |      |      |                  |                                                                                    |  |
| 25 |                                 |         |                                        |                                            |       |                         |     |                      |        |      |      |                  |                                                                                    |  |
| 26 |                                 |         |                                        |                                            |       |                         |     |                      |        |      |      |                  |                                                                                    |  |
| 27 |                                 |         |                                        |                                            |       |                         |     |                      |        |      |      |                  |                                                                                    |  |
| 28 | Ylipalosaari et al. (2012) [34] | Finland | Retrospective cohort study             | MICU, SICU                                 | 82    | ICU-acquired candidemia | 38  | 63 (45-69) §         | 71%    | 76.3 | —    | Median: 22 days  | Fluconazole (73%)<br>Amphotericin B (34%)<br>Echinocandins (31%)                   |  |
| 29 |                                 |         |                                        |                                            |       |                         |     |                      |        |      |      |                  |                                                                                    |  |
| 30 |                                 |         |                                        |                                            |       |                         |     |                      |        |      |      |                  |                                                                                    |  |
| 31 |                                 |         |                                        |                                            |       |                         |     |                      |        |      |      |                  |                                                                                    |  |
| 32 |                                 |         |                                        |                                            |       |                         |     |                      |        |      |      |                  |                                                                                    |  |
| 33 |                                 |         |                                        |                                            |       |                         |     |                      |        |      |      |                  |                                                                                    |  |
| 34 |                                 |         |                                        |                                            |       |                         |     |                      |        |      |      |                  |                                                                                    |  |
| 35 |                                 |         |                                        |                                            |       |                         |     |                      |        |      |      |                  |                                                                                    |  |
| 36 | Pasero D et al. (2011) [35]     | Italy   | Prospective cohort study               | SICU                                       | 349   | Candidemia              | 26  | 60±21                | 61.5 % | 73   | —    | —                | —                                                                                  |  |
| 37 |                                 |         |                                        |                                            |       |                         |     |                      |        |      |      |                  |                                                                                    |  |
| 38 |                                 |         |                                        |                                            |       |                         |     |                      |        |      |      |                  |                                                                                    |  |
| 39 |                                 |         |                                        |                                            |       |                         |     |                      |        |      |      |                  |                                                                                    |  |
| 40 |                                 |         |                                        |                                            |       |                         |     |                      |        |      |      |                  |                                                                                    |  |
| 41 |                                 |         |                                        |                                            |       |                         |     |                      |        |      |      |                  |                                                                                    |  |
| 42 |                                 |         |                                        |                                            |       |                         |     |                      |        |      |      |                  |                                                                                    |  |
| 43 |                                 |         |                                        |                                            |       |                         |     |                      |        |      |      |                  |                                                                                    |  |
| 44 |                                 |         |                                        |                                            |       |                         |     |                      |        |      |      |                  |                                                                                    |  |
| 45 |                                 |         |                                        |                                            |       |                         |     |                      |        |      |      |                  |                                                                                    |  |
| 46 |                                 |         |                                        |                                            |       |                         |     |                      |        |      |      |                  |                                                                                    |  |

|  |                                |                                    |                            |                        |         |                                            |       |           |       |      |     |              |                                                              |
|--|--------------------------------|------------------------------------|----------------------------|------------------------|---------|--------------------------------------------|-------|-----------|-------|------|-----|--------------|--------------------------------------------------------------|
|  |                                |                                    |                            |                        | Control | 323                                        | 67±16 | 65.3%     | —     | —    | —   |              |                                                              |
|  | Han SS et al. (2010) [36]      | Korea                              | Case-control study         | MICU                   | 52      | Candidemia                                 | 49    | 57.6±14.1 | —     | 65   | 25% | 11 (1-45)†   | Amphotericin B (71.4%)                                       |
|  |                                |                                    |                            |                        |         | Control                                    | 147   | 57.4±14.0 | —     | —    | 8%  | days         | Fluconazole (28.6%)                                          |
|  | Pratikaki M et al. (2009) [37] | Greece                             | Case-control study         | Multi-disciplinary ICU | 855     | Candidemia                                 | 33    | 57±18     | 64%   | 33.3 | 0%  |              | Amphotericin B (57.1%)                                       |
|  |                                |                                    |                            |                        |         | Control                                    | 132   | 58±18     | 70%   | —    | 0%  | >14 days     | Voriconazole(17.9%), Caspofungin (14.3%) Fluconazole (10.7%) |
|  | Playford et al.(2009) [38]     | Australia                          | Prospective cohort study   | MICU, SICU             | 615     | IC                                         | 15    | NA        | NA    | 73.3 | 0%  | —            | —                                                            |
|  | Holleyetal.(2009) [39]         | Australia, Belgium, Greece, Brazil | Retrospective cohort study | Multi-disciplinary ICU | 189     | Candidemia ( <i>C. albicans</i> )          | 104   | 56.5±17.1 | 63.5% | 100  | —   | 1(1-32)†days | Fluconazole (37%) Amphotericin B (31%)                       |
|  |                                |                                    |                            |                        |         | Candidemia (Non- <i>Candida albicans</i> ) | 85    | 58.9±16.3 | 44.7% | —    | —   |              | Fluconazole and amphotericin B (15%)                         |
|  | Choi et al. (2009) [40]        | Korea                              | Retrospective cohort study | ICU                    | 497     | Candidemia ( <i>C. albicans</i> )          | 54    | 49±23     | 44.4% | 100  | 13% | —            | Amphotericin B (77.8%) Fluconazole (16.7%)                   |
|  |                                |                                    |                            |                        |         | Candidemia                                 | 27    | 48±25     | 44.4% | —    | 19% | —            | Fluconazole and amphotericin B (5.6%)                        |

| Author (Year) [ref]         | Country         | Study Design               | Setting                  | n   | Infection                                                  | n   | APACHE II  | SOFA   | Mortality % | Survival % | LOS (days)     | Treatment                                                                                                             |
|-----------------------------|-----------------|----------------------------|--------------------------|-----|------------------------------------------------------------|-----|------------|--------|-------------|------------|----------------|-----------------------------------------------------------------------------------------------------------------------|
| Yap et al (2009) [50]       | China Hong Kong | Retrospective cohort study | MICU SICU                | 128 | Candidemia<br>( <i>C. glabrata</i> ,<br><i>C. krusei</i> ) | 128 | 54 (43-68) | 63.3 % | 56          | 11%        | —              | Amphotericin B (39.1%)<br>Fluconazole (38%)<br>Amphotericin B+fluconazole (13%)<br>Caspofungin or voriconazole (9.8%) |
| Chow et al. (2008) [41]     | US              | Case-control study         | MICU, SICU               | 926 | Candidemia<br>(Non- <i>Candida albicans</i> )              | 67  | 62.3±14.5  | 57%    | —           | —          | —              | Fluconazole (84.8%)<br>Amphotericin B (23.9%)<br>Caspofungin (10.9%)<br>Voriconazole (4.3%)                           |
|                             |                 |                            |                          |     | Candidemia<br>( <i>C. albicans</i> )                       | 79  | 57±17.0    | 60%    | 100         | —          | —              | Fluconazole (63%)<br>Amphotericin B (33.3%)<br>Caspofungin (11.1%)<br>Voriconazole (0%)                               |
|                             |                 |                            |                          |     | Control                                                    | 780 | 62.3±17.4  | 56%    | —           | —          | —              | Fluconazole (100%)<br>Amphotericin B (14.3%)<br>Caspofungin (0%)<br>Voriconazole (0%)                                 |
| Bougnoux et al. (2008) [42] | France          | Prospective cohort study   | MICU<br>SICU<br>HU<br>BU | 290 | Candidemia                                                 | 57  | 56.1±18.2  | 67%    | 54.2        | 19.3%      | 13.2±10.3 days | Fluconazole (78.3%)<br>Amphotericin B (52.2%)<br>Flucytosine (15.2%)                                                  |
| Girão et al. (2008) [43]    | Brazil          | Prospective cohort study   | ICU                      | 73  | Candidemia<br>(Non- <i>Candida</i> )                       | 40  | 51 (12-86) | 60%*   | —           | —          | —              | —                                                                                                                     |

|  |                               |        |                          |            |      |                                            |      |               |        |       |               |                                                                       |                                                                        |
|--|-------------------------------|--------|--------------------------|------------|------|--------------------------------------------|------|---------------|--------|-------|---------------|-----------------------------------------------------------------------|------------------------------------------------------------------------|
|  |                               |        |                          |            |      | <i>albicans</i> )                          |      |               |        |       |               |                                                                       |                                                                        |
|  |                               |        |                          |            |      | Candidemia ( <i>C. albicans</i> )          | 33   | 51(15-86)*    | 40%    | 100   | —             | —                                                                     | —                                                                      |
|  | Dimopoulos et al. (2008) [44] | Greece | Prospective cohort study | MICU, SICU | 56   | Candidemia ( <i>C. albicans</i> )          | 36   | 60.5 ± 14.9   | 44.4 % | 100   | 0% (excluded) | Response rate: (80.6%)                                                | Fluconazole as prophylaxis: Amphotericin B (75%) Caspofungin (25%)     |
|  |                               |        |                          |            |      |                                            |      |               |        |       |               | No fluconazole as prophylaxis: Amphotericin B (60%) Caspofungin (40%) |                                                                        |
|  |                               |        |                          |            |      | Candidemia (Non- <i>Candida albicans</i> ) | 20   | 64.5± 16.8    | 55%    | —     |               | Response rate: (45%)                                                  | Amphotericin B (100%)                                                  |
|  | Dimopoulos et al. (2007) [45] | Greece | Prospective cohort study | MICU, SICU | 24   | Candidemia                                 | 24   | —             | —      | 62.5  | —             | 16.5 (14-24)*days                                                     | <i>C. albicans</i> : fluconazole Non- <i>albicans</i> : amphotericin B |
|  | Jordà-Marcos R (2007) [62]    | Spain  | prospective cohort       | MICU, SICU | 1765 | Candidemia                                 | 63   | 63 (48 - 70)† | 71.4 % | 57.10 | 6.3%          | —                                                                     | 7.90%                                                                  |
|  |                               |        |                          |            |      | Control (non-Candidemia)                   | 1072 | 63 (46 - 71)† | 66.5 % | —     | 2.8%          | —                                                                     | 5.60%                                                                  |
|  | Piazza O (2004) [63]          | Italy  | retrospective cohort     | ICU        | 478  | Candidemia                                 | 12   | 57.58± 22.07  | 58.3 % | 67    | —             | —                                                                     | —                                                                      |



**Table 2. Length of hospital and ICU stay, percentages of patients receiving antibiotics duration of antibiotic therapy prior to candidemia onset, and overall mortality**

| Studies<br>1 <sup>st</sup> Author<br>(year) | Length of hospital<br>stay (days)                                                           | Length of ICU stay<br>(days)         | Length of<br>hospital stay<br>prior to ICU<br>admission<br>(days) | Duration of ICU admission<br>prior to candidemia onset<br>(days) | Percentages of patients<br>receiving antibiotic therapy<br>prior to candidemia onset | Duration of antibiotic<br>therapy prior to<br>candidemia onset (days) | Overall mortality<br>rate                           |
|---------------------------------------------|---------------------------------------------------------------------------------------------|--------------------------------------|-------------------------------------------------------------------|------------------------------------------------------------------|--------------------------------------------------------------------------------------|-----------------------------------------------------------------------|-----------------------------------------------------|
| Zhao H<br>(2018) [51]                       | N/A                                                                                         | 24 (12-57)†                          | N/A                                                               | N/A                                                              | N/A                                                                                  | N/A                                                                   | 58%                                                 |
| Ding R<br>(2018) [52]                       | N/A                                                                                         | N/A                                  | N/A                                                               | N/A                                                              | Broad-spectrum antibiotics:<br>98.6%                                                 | N/A                                                                   | 31.90%                                              |
| Yang et al.<br>(2017) [26]                  | (prior to IC<br>diagnosis)<br>Early-onset IC:4 (2,<br>7)§<br>Late-onset IC: 26<br>(16, 50)§ | N/A                                  | N/A                                                               | Early-onset IC: 4 (1, 7)§<br>Late-onset IC: 17 (10, 33)§         | Early-onset IC: 62 (59.0%)<br>Late-onset IC: 179 (89.1%)                             | N/A                                                                   | Early-onset IC:<br>28.6%<br>Late-onset IC:<br>40.8% |
| Tigen E<br>(2017) [53]                      | N/A                                                                                         | 22 (18-30)†<br><br>5.5 (2.25-15.75)† | N/A                                                               | N/A                                                              | Broad-spectrum antibiotic: 100%<br><br>Broad-spectrum antibiotic:<br>59.5%           | N/A                                                                   | 83.30%                                              |
| Baldesi O<br>(2017) [54]                    | N/A                                                                                         | 29 (18; 49) §<br><br>7 (4; 13) §     | N/A                                                               | N/A                                                              | antimicrobials: 82.2%<br><br>antimicrobials: 55.1%                                   | N/A                                                                   | 52.40%<br><br>17.80%                                |
| Rudramurt<br>hy SM<br>(2017) [55]           | N/A                                                                                         | N/A                                  | N/A                                                               | 10 (4.7 – 22.2)§<br><br>7 (3 – 13)§                              | N/A                                                                                  | N/A                                                                   | 41.90%<br><br>27%                                   |



|    |                                    |                                                                                    |                                                                                    |             |                               |                                                                                                                      |                   |                                                                                                              |
|----|------------------------------------|------------------------------------------------------------------------------------|------------------------------------------------------------------------------------|-------------|-------------------------------|----------------------------------------------------------------------------------------------------------------------|-------------------|--------------------------------------------------------------------------------------------------------------|
| 1  |                                    |                                                                                    |                                                                                    |             |                               |                                                                                                                      |                   |                                                                                                              |
| 2  |                                    |                                                                                    |                                                                                    |             |                               |                                                                                                                      |                   |                                                                                                              |
| 3  |                                    |                                                                                    |                                                                                    |             |                               |                                                                                                                      |                   |                                                                                                              |
| 4  |                                    |                                                                                    |                                                                                    |             |                               |                                                                                                                      |                   |                                                                                                              |
| 5  | Kawano Y<br>(2017) [56]            | N/A                                                                                | N/A                                                                                | N/A         | 13 (1 – 73)†                  | Broad-spectrum antimicrobial:<br>84%                                                                                 | N/A               | 72%                                                                                                          |
| 6  |                                    |                                                                                    |                                                                                    |             |                               |                                                                                                                      |                   |                                                                                                              |
| 7  | OrtízRuiz<br>et al.<br>(2016) [16] | 35.4±3.0                                                                           | 21.9±1.7                                                                           | N/A         | Median 25                     | Broad-spectrum antibiotic: 93.8<br>vs. 69.8% (case vs. control)                                                      | N/A               | 39.51%                                                                                                       |
| 8  |                                    |                                                                                    |                                                                                    |             |                               |                                                                                                                      |                   |                                                                                                              |
| 9  |                                    |                                                                                    |                                                                                    |             |                               |                                                                                                                      |                   |                                                                                                              |
| 10 |                                    |                                                                                    |                                                                                    |             |                               |                                                                                                                      |                   |                                                                                                              |
| 11 | Gong et al.<br>(2016) [47]         | <i>Candida albicans</i> :<br>Median: 32<br>Non- <i>C. albicans</i> :<br>Median: 44 | <i>Candida albicans</i> :<br>Median: 18<br>Non- <i>C. albicans</i> :<br>Median: 29 | N/A         | N/A                           | <i>Candida albicans</i> (before<br>diagnosis): 76 (77.6%)<br>Non- <i>albicans</i> (before diagnosis):<br>121 (82.9%) | N/A               | <i>Candida albicans</i> (before<br>diagnosis):<br>29.6%<br>Non- <i>albicans</i> (before<br>diagnosis): 26.7% |
| 12 |                                    |                                                                                    |                                                                                    |             |                               |                                                                                                                      |                   |                                                                                                              |
| 13 |                                    |                                                                                    |                                                                                    |             |                               |                                                                                                                      |                   |                                                                                                              |
| 14 |                                    |                                                                                    |                                                                                    |             |                               |                                                                                                                      |                   |                                                                                                              |
| 15 |                                    |                                                                                    |                                                                                    |             |                               |                                                                                                                      |                   |                                                                                                              |
| 16 |                                    |                                                                                    |                                                                                    |             |                               |                                                                                                                      |                   |                                                                                                              |
| 17 | Playford<br>EG (2016)<br>[57]      | 51 (34 – 89)§<br>23 (13 – 40)§                                                     | 21 ( 14 – 32)§<br>8 ( 5 – 12)§                                                     | N/A         | 10 (5 – 15.25 )†              | N/A                                                                                                                  | N/A               | 26%<br>18.3%                                                                                                 |
| 18 |                                    |                                                                                    |                                                                                    |             |                               |                                                                                                                      |                   |                                                                                                              |
| 19 |                                    |                                                                                    |                                                                                    |             |                               |                                                                                                                      |                   |                                                                                                              |
| 20 |                                    |                                                                                    |                                                                                    |             |                               |                                                                                                                      |                   |                                                                                                              |
| 21 | Pinhati<br>HM (2016)<br>[58]       | N/A                                                                                | N/A                                                                                | N/A         | 22 (0 – 83)†<br>25 (7 – 134)† | any: 47.6%<br>any: 42.1%                                                                                             | N/A               | 42.9%<br>47.4%                                                                                               |
| 22 |                                    |                                                                                    |                                                                                    |             |                               |                                                                                                                      |                   |                                                                                                              |
| 23 |                                    |                                                                                    |                                                                                    |             |                               |                                                                                                                      |                   |                                                                                                              |
| 24 |                                    |                                                                                    |                                                                                    |             |                               |                                                                                                                      |                   |                                                                                                              |
| 25 | Aguilar et<br>al. (2015)<br>[15]   | N/A                                                                                | N/A                                                                                | N/A         | 20 (5, 37.5) §                | Antibiotic therapy:21 (95.4 %)                                                                                       | 10 (5.0–16.5)†    | 13.60%                                                                                                       |
| 26 |                                    |                                                                                    |                                                                                    |             |                               |                                                                                                                      |                   |                                                                                                              |
| 27 |                                    |                                                                                    |                                                                                    |             |                               |                                                                                                                      |                   |                                                                                                              |
| 28 | Fochtman<br>et al.<br>(2015) [27]  | N/A                                                                                | 60 (13–176) †                                                                      | N/A         | 16 (6–89) †                   | Broad-spectrum antibiotic<br>treatment in most patients                                                              | 16 (6–89)†        | 30%                                                                                                          |
| 29 |                                    |                                                                                    |                                                                                    |             |                               |                                                                                                                      |                   |                                                                                                              |
| 30 |                                    |                                                                                    |                                                                                    |             |                               |                                                                                                                      |                   |                                                                                                              |
| 31 |                                    |                                                                                    |                                                                                    |             |                               |                                                                                                                      |                   |                                                                                                              |
| 32 | Klingspore<br>t al.(2015)<br>[28]  | N/A                                                                                | 23 (0–329) †                                                                       | 2 (0-744) † | 12 (0–190) †                  | Broad-spectrum antibiotics in the<br>last 2 weeks: 511 (78.4%)                                                       | N/A               | 38.80%                                                                                                       |
| 33 |                                    |                                                                                    |                                                                                    |             |                               |                                                                                                                      |                   |                                                                                                              |
| 34 |                                    |                                                                                    |                                                                                    |             |                               |                                                                                                                      |                   |                                                                                                              |
| 35 |                                    |                                                                                    |                                                                                    |             |                               |                                                                                                                      |                   |                                                                                                              |
| 36 | Chakrabart<br>i et al.             | N/A                                                                                | N/A                                                                                | N/A         | 8 (4, 15) §                   | Candidemia patients received:<br>antibiotics:93.0%                                                                   | 16.0 (7–36) days§ | 44.70%                                                                                                       |
| 37 |                                    |                                                                                    |                                                                                    |             |                               |                                                                                                                      |                   |                                                                                                              |
| 38 |                                    |                                                                                    |                                                                                    |             |                               |                                                                                                                      |                   |                                                                                                              |
| 39 |                                    |                                                                                    |                                                                                    |             |                               |                                                                                                                      |                   |                                                                                                              |
| 40 |                                    |                                                                                    |                                                                                    |             |                               |                                                                                                                      |                   |                                                                                                              |
| 41 |                                    |                                                                                    |                                                                                    |             |                               |                                                                                                                      |                   |                                                                                                              |
| 42 |                                    |                                                                                    |                                                                                    |             |                               |                                                                                                                      |                   |                                                                                                              |
| 43 |                                    |                                                                                    |                                                                                    |             |                               |                                                                                                                      |                   |                                                                                                              |
| 44 |                                    |                                                                                    |                                                                                    |             |                               |                                                                                                                      |                   |                                                                                                              |
| 45 |                                    |                                                                                    |                                                                                    |             |                               |                                                                                                                      |                   |                                                                                                              |
| 46 |                                    |                                                                                    |                                                                                    |             |                               |                                                                                                                      |                   |                                                                                                              |

(2015) [29]

|                                |                                              |                                                  |                             |                                                     |                                                                   |                                                    |                              |
|--------------------------------|----------------------------------------------|--------------------------------------------------|-----------------------------|-----------------------------------------------------|-------------------------------------------------------------------|----------------------------------------------------|------------------------------|
| Liao et al.<br>(2015) [14]     | Flu-S: 34.5 (18, 65)<br>Flu-R: 48.0 (21, 90) | Flu-S: 22.5 (10.0, 40.0)<br>Flu-R: 29.0 (17, 59) | N/A                         | Flu-S: 8.0 (3.0, 17.0)§<br>Flu-R: 10.5 (4.0, 27.0)§ | ≥5 d before diagnosis:<br>Flu-S: 101 (78.3%)<br>Flu-R: 73 (81.1%) | N/A                                                | Flu-S: 31.8%<br>Flu-R: 41.1% |
| Kautzky S<br>(2015) [59]       | N/A                                          | 46 (14 - 74)†<br>21 (10 - 77)†                   | 17 (1 - 21)†<br>3 (1 - 66)† | 17.4 ± 14.5                                         | 100%<br>90%                                                       | N/A                                                | 80%<br>21.7%                 |
| Karacaer et al.<br>(2014) [31] | 46.8±36.7 (5-190)                            | 32.9±36.9 (0-190)                                | N/A                         | N/A                                                 | N/A                                                               | 15 ± 13.8                                          | 77.70%                       |
| Colombo et al.<br>(2014) [32]  | N/A                                          | N/A                                              | N/A                         | 20 (0-188) †                                        | Prior antibiotic expose: 96.1%                                    | N/A                                                | 70.30%                       |
| Hu et al.<br>(2014) [48]       | 54.0 (26.0-91.0) §                           | 34.0 (18.0-71.0) §                               | N/A                         | 11.0 (4.0, 26.0)§                                   | CRCBSI: 100%<br>N CRCBSI:99.5%                                    | CRCBSI: 11.4 ± 4.2 days;<br>N CRCBSI:10.6 ±6.5 day | 44.80%                       |
| Lortholary O<br>(2014) [60]    | N/A                                          | N/A                                              | N/A                         | N/A                                                 | N/A                                                               | N/A                                                | 51.00%<br>30.70%             |
| Yapar N<br>(2014) [61]         | N/A                                          | 30.9±33<br>12.9±13                               | N/A                         | N/A                                                 | 96.9%<br>78.3%                                                    | N/A                                                | 43.9%<br>32.2%               |
| Guo et al.<br>(2013) [49]      | N/A                                          | N/A                                              | N/A                         | 10 (0-330)†                                         | Treatment before diagnostic confirm: 74 (27.6%)                   | N/A                                                | 36.60%                       |
| Giri S<br>(2013) [30]          | N/A                                          | mean 26.4 (range 9-86) days                      | N/A                         | N/A                                                 | 66.70%                                                            | mean 19.45 (range 4-31) days                       | 24%                          |

|    |                                            |                                                                                           |                                                                       |             |                                                                    |                                                                                                |                                                                           |                                                                |
|----|--------------------------------------------|-------------------------------------------------------------------------------------------|-----------------------------------------------------------------------|-------------|--------------------------------------------------------------------|------------------------------------------------------------------------------------------------|---------------------------------------------------------------------------|----------------------------------------------------------------|
| 1  |                                            |                                                                                           |                                                                       |             |                                                                    |                                                                                                |                                                                           |                                                                |
| 2  |                                            |                                                                                           |                                                                       |             |                                                                    |                                                                                                |                                                                           |                                                                |
| 3  |                                            |                                                                                           |                                                                       |             |                                                                    |                                                                                                |                                                                           |                                                                |
| 4  |                                            |                                                                                           |                                                                       |             |                                                                    |                                                                                                |                                                                           |                                                                |
| 5  | Tortorano et al.(2012) <sup>[33]</sup>     | N/A                                                                                       | N/A                                                                   | N/A         | 22.8 (2–190)†                                                      | broad spectrum antibiotic treatment: 85%                                                       | N/A                                                                       | 46.20%                                                         |
| 6  |                                            |                                                                                           |                                                                       |             |                                                                    |                                                                                                |                                                                           |                                                                |
| 7  |                                            |                                                                                           |                                                                       |             |                                                                    |                                                                                                |                                                                           |                                                                |
| 8  | Ylipalosaari et al. (2012) <sup>[34]</sup> | 38.0 (22- 59) §                                                                           | 16.0 (11-30) §                                                        | 1 (0-2) §   | 8.0 (1.0, 12.0) §                                                  | Previous antibacterial treatment (%): 97.4-95.5%                                               | N/A                                                                       | 65.80%                                                         |
| 9  |                                            |                                                                                           |                                                                       |             |                                                                    |                                                                                                |                                                                           |                                                                |
| 10 |                                            |                                                                                           |                                                                       |             |                                                                    |                                                                                                |                                                                           |                                                                |
| 11 |                                            |                                                                                           |                                                                       |             |                                                                    |                                                                                                |                                                                           |                                                                |
| 12 | Pasero D et al. (2011) <sup>[35]</sup>     | N/A                                                                                       | 21±7                                                                  | N/A         | 20 (8, 49) §                                                       | A significantly higher administration of > 2 antibiotics for >72 hours.                        | N/A                                                                       | 47%                                                            |
| 13 |                                            |                                                                                           |                                                                       |             |                                                                    |                                                                                                |                                                                           |                                                                |
| 14 |                                            |                                                                                           |                                                                       |             |                                                                    |                                                                                                |                                                                           |                                                                |
| 15 |                                            |                                                                                           |                                                                       |             |                                                                    |                                                                                                |                                                                           |                                                                |
| 16 | Han SS et al. (2010) <sup>[36]</sup>       | 38 (2-141)§                                                                               | 22 (1-141)§                                                           | 8 (0-92) §  | 17 (0-117) †                                                       | All patients were treated with antibiotics prior to candidaemia onset                          | 16 (1-92) †                                                               | 96.00%                                                         |
| 17 |                                            |                                                                                           |                                                                       |             |                                                                    |                                                                                                |                                                                           |                                                                |
| 18 |                                            |                                                                                           |                                                                       |             |                                                                    |                                                                                                |                                                                           |                                                                |
| 19 |                                            |                                                                                           |                                                                       |             |                                                                    |                                                                                                |                                                                           |                                                                |
| 20 | Pratikaki M et al. (2009) <sup>[37]</sup>  | N/A                                                                                       | 25 (14-46)§                                                           | 14 (1-20) § | 10 (3, 22) §                                                       | All patients received antimicrobial agents prior to candidaemia onset                          | N/A                                                                       | 60.60%                                                         |
| 21 |                                            |                                                                                           |                                                                       |             |                                                                    |                                                                                                |                                                                           |                                                                |
| 22 |                                            |                                                                                           |                                                                       |             |                                                                    |                                                                                                |                                                                           |                                                                |
| 23 |                                            |                                                                                           |                                                                       |             |                                                                    |                                                                                                |                                                                           |                                                                |
| 24 | Playford et al.(2009) <sup>[38]</sup>      | N/A                                                                                       | NA                                                                    | N/A         | 10 (4, 16) §                                                       | Antibiotic receipt on days 1–3: 83.4%;<br>Broad-spectrum antibiotic receipt on days 1–3: 82.0% | N/A                                                                       | 10.60%                                                         |
| 25 |                                            |                                                                                           |                                                                       |             |                                                                    |                                                                                                |                                                                           |                                                                |
| 26 |                                            |                                                                                           |                                                                       |             |                                                                    |                                                                                                |                                                                           |                                                                |
| 27 |                                            |                                                                                           |                                                                       |             |                                                                    |                                                                                                |                                                                           |                                                                |
| 28 | Holleyetal. (2009) <sup>[39]</sup>         | N/A                                                                                       | <i>C. albicans</i> : 29.0±18.5<br>non- <i>C. albicans</i> : 29.2±28.2 | N/A         | N/A                                                                | All patients received antimicrobial agents prior to candidaemia onset                          | <i>C. albicans</i> : 13 (median)<br>non- <i>C. albicans</i> : 15 (median) | <i>C. albicans</i> : 52.9%<br>non- <i>C. albicans</i> : 64.7%  |
| 29 |                                            |                                                                                           |                                                                       |             |                                                                    |                                                                                                |                                                                           |                                                                |
| 30 |                                            |                                                                                           |                                                                       |             |                                                                    |                                                                                                |                                                                           |                                                                |
| 31 |                                            |                                                                                           |                                                                       |             |                                                                    |                                                                                                |                                                                           |                                                                |
| 32 | Choi et al. (2009) <sup>[40]</sup>         | (prior to fungemia)<br><i>Candida albicans</i> : 42±47<br>Non- <i>C. albicans</i> : 38±33 | <i>Candida albicans</i> : 19±41<br>Non- <i>C. albicans</i> : 25±50    | N/A         | <i>Candida albicans</i> : 11±25<br>Non- <i>C. albicans</i> : 15±31 | N/A                                                                                            | N/A                                                                       | <i>Candida albicans</i> : 48%<br>Non- <i>C. albicans</i> : 67% |
| 33 |                                            |                                                                                           |                                                                       |             |                                                                    |                                                                                                |                                                                           |                                                                |
| 34 |                                            |                                                                                           |                                                                       |             |                                                                    |                                                                                                |                                                                           |                                                                |
| 35 |                                            |                                                                                           |                                                                       |             |                                                                    |                                                                                                |                                                                           |                                                                |
| 36 |                                            |                                                                                           |                                                                       |             |                                                                    |                                                                                                |                                                                           |                                                                |
| 37 |                                            |                                                                                           |                                                                       |             |                                                                    |                                                                                                |                                                                           |                                                                |
| 38 |                                            |                                                                                           |                                                                       |             |                                                                    |                                                                                                |                                                                           |                                                                |
| 39 |                                            |                                                                                           |                                                                       |             |                                                                    |                                                                                                |                                                                           |                                                                |
| 40 |                                            |                                                                                           |                                                                       |             |                                                                    |                                                                                                |                                                                           |                                                                |
| 41 |                                            |                                                                                           |                                                                       |             |                                                                    |                                                                                                |                                                                           |                                                                |
| 42 |                                            |                                                                                           |                                                                       |             |                                                                    |                                                                                                |                                                                           |                                                                |
| 43 |                                            |                                                                                           |                                                                       |             |                                                                    |                                                                                                |                                                                           |                                                                |
| 44 |                                            |                                                                                           |                                                                       |             |                                                                    |                                                                                                |                                                                           |                                                                |
| 45 |                                            |                                                                                           |                                                                       |             |                                                                    |                                                                                                |                                                                           |                                                                |
| 46 |                                            |                                                                                           |                                                                       |             |                                                                    |                                                                                                |                                                                           |                                                                |

|    |                   |                                       |                                       |     |                                                                                  |                                                                                                                     |                 |                                                              |
|----|-------------------|---------------------------------------|---------------------------------------|-----|----------------------------------------------------------------------------------|---------------------------------------------------------------------------------------------------------------------|-----------------|--------------------------------------------------------------|
| 1  |                   |                                       |                                       |     |                                                                                  |                                                                                                                     |                 |                                                              |
| 2  |                   |                                       |                                       |     |                                                                                  |                                                                                                                     |                 |                                                              |
| 3  |                   |                                       |                                       |     |                                                                                  |                                                                                                                     |                 |                                                              |
| 4  |                   |                                       |                                       |     |                                                                                  |                                                                                                                     |                 |                                                              |
| 5  | Yap et al         | 28 (17-54) §                          | 14 (5-23) §                           | N/A | 6 (1-13)§                                                                        | Antibiotics > 48 hours before candidaemia:<br><i>C. albicans</i> : 70 (97.0%)<br><i>non-C. albicans</i> : 56 (100%) | N/A             | 70%                                                          |
| 6  | (2009) [50]       |                                       |                                       |     |                                                                                  |                                                                                                                     |                 |                                                              |
| 7  |                   |                                       |                                       |     |                                                                                  |                                                                                                                     |                 |                                                              |
| 8  |                   |                                       |                                       |     |                                                                                  |                                                                                                                     |                 |                                                              |
| 9  | Chow et al.       | <i>Candida albicans</i> : 28 (20–42)§ | <i>Candida albicans</i> : 22 (15–33)§ | N/A | <i>Candida albicans</i> : 11 (9, 17) §<br>Non- <i>C. albicans</i> : 10 (4, 21) § | Non- <i>C. albicans</i> : 0.75 (0–2) §                                                                              | 2.21 (1.4–2.7)§ | <i>Candida albicans</i> : 58%<br>Non- <i>albicans</i> : 57%; |
| 10 | (2008) [41]       | Non- <i>C. albicans</i> : 37 (24–57)§ | Non- <i>C. albicans</i> : 25 (14–40)§ |     |                                                                                  |                                                                                                                     |                 |                                                              |
| 11 |                   |                                       |                                       |     |                                                                                  |                                                                                                                     |                 |                                                              |
| 12 |                   |                                       |                                       |     |                                                                                  |                                                                                                                     |                 |                                                              |
| 13 |                   |                                       |                                       |     |                                                                                  |                                                                                                                     |                 |                                                              |
| 14 | Bougnoux et al.   | N/A                                   | 43.1 ± 45.2                           | N/A | 19.0 ± 2.9 or (13.0; 2-145)§                                                     | No antibiotic treatment is reported                                                                                 | N/A             | 61.80%                                                       |
| 15 | (2008)            |                                       |                                       |     |                                                                                  |                                                                                                                     |                 |                                                              |
| 16 | [42]              |                                       |                                       |     |                                                                                  |                                                                                                                     |                 |                                                              |
| 17 |                   |                                       |                                       |     |                                                                                  |                                                                                                                     |                 |                                                              |
| 18 | Girão et al.      | N/A                                   | N/A                                   | N/A | <i>C. albicans</i> : 15 (mean)<br>Non- <i>C. albicans</i> : 18 (mean)            | The hospital is restricted the use of several antibiotics                                                           | N/A             | <i>C. albicans</i> : 72%<br>non- <i>C. albicans</i> : 80%    |
| 19 | (2008)            |                                       |                                       |     |                                                                                  |                                                                                                                     |                 |                                                              |
| 20 | [43]              |                                       |                                       |     |                                                                                  |                                                                                                                     |                 |                                                              |
| 21 |                   |                                       |                                       |     |                                                                                  |                                                                                                                     |                 |                                                              |
| 22 | Dimopoulou et al. | <i>C. albicans</i> : 22 ± 7.6         | N/A                                   | N/A | <i>C. albicans</i> : 12 ± 2.2<br>non- <i>C. albicans</i> : 10 ± 2.4              | 100% of patients received broad spectrum antibiotic treatment for >3 days during the ICU stay.                      | N/A             | <i>C. albicans</i> : 52.8%<br>non- <i>C. albicans</i> : 90%  |
| 23 | (2008) [44]       | non- <i>C. albicans</i> : 25 ± 8.4    |                                       |     |                                                                                  |                                                                                                                     |                 |                                                              |
| 24 |                   |                                       |                                       |     |                                                                                  |                                                                                                                     |                 |                                                              |
| 25 |                   |                                       |                                       |     |                                                                                  |                                                                                                                     |                 |                                                              |
| 26 |                   |                                       |                                       |     |                                                                                  |                                                                                                                     |                 |                                                              |
| 27 | Dimopoulou et al. | N/A                                   | N/A                                   | N/A | 9 (5–11) †                                                                       | 100% of patients received broad spectrum antibiotic treatment                                                       | N/A             | N/A                                                          |
| 28 | (2007)            |                                       |                                       |     |                                                                                  |                                                                                                                     |                 |                                                              |
| 29 | [45]              |                                       |                                       |     |                                                                                  |                                                                                                                     |                 |                                                              |
| 30 |                   |                                       |                                       |     |                                                                                  |                                                                                                                     |                 |                                                              |
| 31 | Jordà-Marcos R    | 48 (26 – 69)                          | 28 (17 – 45)                          | N/A | 23.5 ± 54.7                                                                      | 100%                                                                                                                | N/A             | 17.2%                                                        |
| 32 | (2007) [62]       | 35 (22 – 57)                          | 18 (12 – 28)                          |     |                                                                                  | 96.5%                                                                                                               |                 | 13.2%                                                        |
| 33 |                   |                                       |                                       |     |                                                                                  |                                                                                                                     |                 |                                                              |
| 34 |                   |                                       |                                       |     |                                                                                  |                                                                                                                     |                 |                                                              |
| 35 | Piazza O          | N/A                                   | N/A                                   | N/A | median 13 days                                                                   | N/A                                                                                                                 | N/A             | 67%                                                          |
| 36 | (2004) [63]       |                                       |                                       |     |                                                                                  |                                                                                                                     |                 |                                                              |
| 37 |                   |                                       |                                       |     |                                                                                  |                                                                                                                     |                 |                                                              |
| 38 |                   |                                       |                                       |     |                                                                                  |                                                                                                                     |                 |                                                              |
| 39 |                   |                                       |                                       |     |                                                                                  |                                                                                                                     |                 |                                                              |
| 40 |                   |                                       |                                       |     |                                                                                  |                                                                                                                     |                 |                                                              |
| 41 |                   |                                       |                                       |     |                                                                                  |                                                                                                                     |                 |                                                              |
| 42 |                   |                                       |                                       |     |                                                                                  |                                                                                                                     |                 |                                                              |
| 43 |                   |                                       |                                       |     |                                                                                  |                                                                                                                     |                 |                                                              |
| 44 |                   |                                       |                                       |     |                                                                                  |                                                                                                                     |                 |                                                              |
| 45 |                   |                                       |                                       |     |                                                                                  |                                                                                                                     |                 |                                                              |
| 46 |                   |                                       |                                       |     |                                                                                  |                                                                                                                     |                 |                                                              |

|   |                      |     |            |     |              |                                                                                      |
|---|----------------------|-----|------------|-----|--------------|--------------------------------------------------------------------------------------|
| 1 |                      |     |            |     |              |                                                                                      |
| 2 |                      |     |            |     |              |                                                                                      |
| 3 |                      |     |            |     |              |                                                                                      |
| 4 |                      |     |            |     |              |                                                                                      |
| 5 | Michalopoulos et al. | N/A | 27.1 ± 7.5 | N/A | 15 (11-23) † | Empiric antibiotic therapy with 2 N/A or more broad-spectrum agents for all patients |
| 6 | (2003) [46]          |     |            |     |              | N/A                                                                                  |
| 7 |                      |     |            |     |              |                                                                                      |
| 8 |                      |     |            |     |              |                                                                                      |

Abbreviations: ARDS, acute respiratory distress syndrome; CPB, cardiopulmonary bypass; CRCBSI, catheter-related bloodstream *Candida* infection; Flu-R, fluconazole-resistant; Flu-S, fluconazole-sensitive; IC, invasive candidiasis; IMV, invasive mechanical ventilation; N/A, not available; SAPS II, Simplified Acute Physiology Score II; TPN, total parenteral nutrition.

§ Data are presented as median (interquartile range; IQR).

† Data are presented as median (range).

For peer review only

1  
2  
3  
4  
5 Among studies that reported mean length of ICU admission being  $\leq 10$  days prior to candidemia onset, including the early-onset group in the  
6  
7 study by Yang et al [26] and Flu-S group in the study by Liao et al. [14], the overall mortality ranged from 28.6% to 70.0% (Table 2). Among  
8  
9 studies that reported the median length of ICU admission being  $>10$  days prior to candidemia onset, the overall mortality ranged from 40.8% to  
10  
11 44.8%.  
12

13  
14 Similar to other countries, most patients with IC in China received antibiotic treatment prior to candidemia onset in the ICU, which ranged  
15  
16 from 59.0% of the early-onset group [26] to 100% in the CRCBSI and non-*C. albicans* groups [49, 51]. Only one study reported the median  
17  
18 duration of antibiotic therapy prior to candidemia onset, which ranged from 10.6 to 11.4 days [49].  
19  
20  
21  
22

## 23 **Meta-analysis**

### 24 *Summary of the clinical outcomes for overall studies or given subgroups*

25  
26 The summary of variables such as the length of hospital stay, length of ICU stay, duration of ICU admission prior to candidemia onset, length of  
27  
28 hospital stay prior to ICU admission, and overall mortality was presented in Table 3. Five studies [14, 26, 47-49] were from China by using  
29  
30 China-SCAN patient data, in which four studies were excluded to avoid overlapping data.  
31  
32  
33  
34  
35  
36  
37  
38  
39  
40  
41  
42  
43  
44  
45  
46

**Table 3. Summary for length of hospital stay, length of ICU stay, duration of ICU admission and hospital stay prior to candidemia onset, and overall mortality for overall or given subgroups<sup>†‡</sup>**

| Comparison                             | Length of hospital stay, days | Length of ICU stay, days      | Duration of ICU admission prior to candidemia onset, days | Length of hospital stay prior to ICU admission, days | Overall mortality             |
|----------------------------------------|-------------------------------|-------------------------------|-----------------------------------------------------------|------------------------------------------------------|-------------------------------|
|                                        | Mean (95%CI.)                 | Mean (95%CI.)                 | Mean (95%CI.)                                             | Mean (95%CI.)                                        | Rate (95%CI.)                 |
| <b>Overall</b>                         | 36.3(25.8, 46.7)              | 25.8(23.6, 28.1)              | 12.9(11.7, 14.2)                                          | 11.7(0.4, 23.1)                                      | 49.3(45.0, 53.5)              |
| <b>Overall optional<sup>abcd</sup></b> | <sup>a</sup> 37.5(33.3, 41.6) | <sup>b</sup> 25.9(23.5, 28.3) | <sup>c</sup> 13.7(12.5, 15.0)                             | —                                                    | <sup>d</sup> 51.0(46.6, 55.4) |
| <b>Subgroups</b>                       |                               |                               |                                                           |                                                      |                               |
| <b>Type of study</b>                   |                               |                               |                                                           |                                                      |                               |
| Prospective                            | 41.0(32.9, 49.1)              | 27.4(24.6, 30.3)              | 12.9(11.5, 14.4)                                          | 19.2(17.2, 21.3)                                     | 42.7(37.9, 47.4)              |
| Retrospective/<br>Cross-sectional      | 31.9(18.2, 45.5)              | 23.9(21.1, 26.6)              | 13.7(11.2, 16.2)                                          | 7.4 (-3.7, 18.4)                                     | 56.5(48.0, 65.0)              |
| <b>Presence of neutropenia</b>         |                               |                               |                                                           |                                                      |                               |
| Neutropenia                            | 34.9(19.8, 50.1)              | 25.4(19.3, 31.5)              | 11.6(9.5, 13.8)                                           | —                                                    | 49.6(40.8, 58.3)              |
| Non-neutropenia                        | 22.9(20.9, 25.0)              | —                             | 10.0(9.3, 10.7)                                           | —                                                    | 41.3(7.9, 74.7)               |
| <b>Type of ICU</b>                     |                               |                               |                                                           |                                                      |                               |
| ICU                                    | 37.7(21.7, 53.7)              | 27.3(24.9, 29.7)              | 14.3(5.7, 6.0)                                            | 17.2(11.9, 22.4)                                     | 49.8(44.3, 55.3)              |

1  
2  
3  
4  
5  
6  
7  
8  
9  
10  
11  
12  
13  
14  
15  
16  
17  
18  
19  
20  
21  
22  
23  
24  
25  
26  
27  
28  
29  
30  
31  
32  
33  
34  
35  
36  
37  
38  
39  
40  
41  
42  
43  
44  
45  
46

|                                  |                  |                  |                    |                  |                   |
|----------------------------------|------------------|------------------|--------------------|------------------|-------------------|
| SICU                             | —                | 21.7(19.5, 23.9) | 17.3(11.9, 22.7)   | —                | 33.1(15.2, 51.1)  |
| MICU                             | —                | 32.7(10.3, 55.2) | 17.0(16.2, 17.8)   | —                | 88.4(72.8, 104.1) |
| MICU+SICU                        | 34.6(28.2, 41.1) | 22.5(18.4, 26.6) | 10.9(9.6, 12.3)    | —                | 45.7(36.4, 55.0)  |
| <i>C. albicans</i>               |                  |                  |                    |                  |                   |
| <i>C. albicans</i>               | 34.2(33.1, 35.3) | 25.9(22.3, 29.5) | 11.0(10.7, 11.3)   | —                | 52.2(40.0, 64.4)  |
| Non <i>C. albicans</i>           | 27.0(24.3, 29.8) | 25.0(18.0, 31.9) | —                  | —                | —                 |
| <b>Presence of IC/candidemia</b> |                  |                  |                    |                  |                   |
| Candidemia                       | 36.3(32.9, 39.8) | 25.8(23.2, 28.3) | 13.2(12.0, 14.5)   | 10.8(-2.0,23.6)  | 51.4(47.1, 55.8)  |
| IC                               | 33.9(-3.7, 71.4) | 26.4(20.7, 32.1) | 11.5(7.7, 15.3)    | —                | 38.9(27.8, 50.1)  |
| <b>Region(s)</b>                 |                  |                  |                    |                  |                   |
| Asia                             | 36.9(23.0, 50.8) | 25.0(20.9, 29.0) | 17.4(14.6, 20.2)   | 19.3(17.2, 21.4) | 51.2(44.7, 57.7)  |
| Europe/US/Australia              | 33.3(20.8, 45.8) | 27.7(23.3, 32.1) | 18.5(15.3, 21.7)   | 9.6 (-1.2, 20.4) | 48.6(42.4, 54.7)  |
| South America                    | —                | —                | 45.8(27.8, 63.7) * | —                | 54.4(38.0, 70.7)  |



Note: Certain subgroups have only 1 study (degree of freedom = 0).

<sup>a</sup> Excluded Yang et al. (2017), Gong et al (2016), Liao et al. (2015), and Guo et al. (2013).

<sup>b</sup> Excluded Yang et al. (2017), Gong et al (2016), Liao et al. (2015), and Guo et al. (2013).

<sup>c</sup> Excluded Yang et al. (2017), Gong et al (2016), Liao et al. (2015), and Hu et al. (2014).

<sup>d</sup> Excluded Yang et al. (2017), Gong et al (2016), Liao et al. (2015), and Hu et al. (2014).

Dash indicates no available

<sup>†</sup> The range width of 95% CI is related to the accuracy of the estimation. The narrower the range, the higher the accuracy of the estimation. If both the upper and lower limits are positive, the clinical outcome estimate for this group of participants is positive, if the lower limit is negative and the upper limit is positive, indicating that the clinical outcome estimate for this type of participants is not significantly greater than 0.

<sup>‡</sup> Meta-regression is used to assess relationship between the study-level covariates and effect size when obvious heterogeneity exists in subgroups.

\* Meta-regression analysis illustrated South American patients had significantly longer duration of ICU admission prior to candidemia onset than their counterparts in Asia, Australia, Europe and North America (using Asia as the reference group, for South America:  $\beta = 25.83$ ,  $p = 0.0308$ ,  $R^2 = 0.097$ ). Other meta-regression analyses in subgroups in this table did not reach statistical significance.

Across all studies, the mean length of hospital stay, mean length of ICU stay, mean duration of ICU admission prior to candidemia onset, mean length of hospital stay prior to ICU admission and mean overall mortality rate were found to be 36.3 days (95% CI: 25.8 - 46.7), 25.8 days (95% CI: 23.6 - 28.1), 12.9 days (95% CI: 11.7 - 14.2), 11.7 days (95% CI: 0.37 - 23.1), and rate of 49.3% (95% CI: 45.0% - 53.5%), respectively. After four China-SCAN studies were excluded from the analysis, the mean length of hospital stay, mean length of ICU stay, mean duration of ICU admission prior to candidemia onset and the mean overall mortality rate were found to be 37.5 days (95% CI: 33.3 - 41.6), 25.9 days (95% CI: 23.5 - 28.3), 13.7 days (95% CI: 12.5 - 15.0) and 50.99% (95% CI: 46.6% - 55.4%), respectively (Table 3).

Other outcomes including types of study, presence of neutropenia, types of ICU, types of *C. Albicans* isolated, presence of IC/candidemia, and regions/countries were also summarized for subgroups of studies (with studies' number  $\geq 2$ ). The interval estimate showed the summarized statistics of subgroups were all significant except for length

1  
2  
3 of hospital stay of patients with IC, length of hospital stay prior to ICU admission of  
4 patients selected from retrospective or cross-sectional type of studies, and patients  
5 with candidemia (95% CI included zero) (Table 3).  
6  
7  
8

9  
10 According to the summarized statistics in Table 3, neutropenic patients had a  
11 greater length of hospital stay (mean=34.9 vs. 22.9 days), a longer duration of ICU  
12 admission prior to candidemia onset (mean=11.6 vs. 10.0 days), and a higher overall  
13 mortality rate (rate: 49.6% vs. 41.3%) than non-neutropenic patients. The mean  
14 durations of ICU admission prior to candidemia onset were 17.3 days, 17 days, 14.3  
15 days, and 10.9 days for patients in surgical ICU (SICU), medical ICU (MICU), ICU,  
16 and MICU+SICU, respectively. Patients with candidemia had a greater length of  
17 hospital stay (mean=36.3 vs. 33.9), longer duration of ICU admission prior to  
18 candidemia onset (mean=13.2 vs. 11.5), and a higher overall mortality rate (51.4% vs.  
19 38.9%) than patients without IC. However, patients with candidemia had a shorter  
20 length of ICU stay (mean=25.8 vs. 26.4 days) and a shorter length of hospital stay  
21 prior to ICU admission (mean=10.8 vs. 15.2 days) than patients with IC. Furthermore,  
22 patients with *C. albicans* also had a higher duration of ICU admission prior to  
23 candidemia onset compared to patients with other species of *C. albicans* (mean=11 vs.  
24 10 days). The mean durations of ICU admission prior to candidemia onset in  
25 hospitalized patients were 18.5 days (95% CI=15.3 – 21.7 days) in Europe, 17.4 days  
26 (95% CI: 14.6 – 20.2 days) in Asia, and 45.8 days (95% CI: 27.8 – 63.7 days) in  
27 South America. Data from Girão et al.[43] and Gong et al.[47] were excluded from  
28 the summarized analysis due to absence of standard deviations for mean values and  
29 data ranges.  
30  
31  
32  
33  
34  
35  
36  
37  
38  
39  
40  
41  
42  
43  
44  
45  
46  
47  
48  
49  
50  
51  
52  
53  
54  
55  
56  
57  
58  
59  
60

1  
2  
3 ***Broad-spectrum antibiotic use prior to candidemia onset, length of hospital stay***  
4  
5 ***prior to ICU admission, and overall mortality***  
6  
7

8 In order to compare the broad-spectrum antibiotic use between IC patients and non-IC  
9 patients, we reviewed and excluded studies containing control groups with  
10 non-invasive candida infection and/or with a clear number of broad-spectrum  
11 antibiotics use. After pooling all data, the difference in IC patients' use of  
12 broad-spectrum antibiotics (89.1%, 95% CI: 82.7%-93.4%) prior to IC onset vs. that  
13 of non-IC patients (77.4%, 95% CI: 52.3%-91.4%) did not reach statistical  
14 significance. The mean duration of antibiotic therapy prior to candidemia onset was  
15 17.8 days (95% CI: 9.3 - 26.3), but the duration of broad-spectrum antibiotic use prior  
16 to the infection could not be determined due to insufficient data. Only five studies  
17 reported length of hospital stay prior to ICU admission and the mean was 11.7 days  
18 (95% CI: 0.4 - 23.1). The overall mortality rate increased from 49.3% to 51.0% after  
19 excluding four China-SCAN studies (Table 3).  
20  
21  
22  
23  
24  
25  
26  
27  
28  
29  
30  
31  
32  
33  
34  
35  
36  
37

38 ***Comparing the effect between *Candida albicans* vs. non-*Candida albicans****  
39

40 A meta-analysis was performed to compare effect of the length of hospital stay, length  
41 of ICU stay, and overall mortality between patients infected with *C. albicans* and  
42 those infected with different strains of *Candida*. Three studies examined the length of  
43 hospital stay [40, 41, 44], three studies examined the length of ICU stay [39-41], and  
44 six studies examined overall mortality [39-41, 43, 44, 47]; these were selected for the  
45 meta-analysis. According to the heterogeneity test, a random effect model was applied  
46 for the length of hospital stay ( $Q = 25.47$ ,  $I^2 = 92.1\%$ ,  $p < 0.001$ ) and overall mortality  
47 rate ( $Q = 399$ ,  $I^2 = 98.7\%$ ,  $p < 0.001$ ), while a fixed effect model was applied for the  
48 length of ICU stay ( $Q = 1.56$ ,  $I^2 = 0\%$ ,  $p = 0.458$ ). The pooled effect demonstrated no  
49  
50  
51  
52  
53  
54  
55  
56  
57  
58  
59  
60

1  
2  
3 significant difference in length of hospital stay between patients with and without *C.*  
4  
5 *albicans* (Figure 2A,  $p>0.05$ ); however, there was a significant difference in mean  
6  
7 length of ICU stay (difference in means = 2.8 days, Figure 2B,  $P<0.001$ ). There was  
8  
9 also no significant difference in overall mortality between patients with and without *C.*  
10  
11 *albicans* (Figure 2C,  $p>0.05$ ).  
12  
13  
14  
15  
16

### 17 ***Quality assessment***

18  
19 Results of the quality assessment are shown in Table 4. For the results of ROBINS-I,  
20  
21 9 studies had serious bias due to confounding because no baseline confounding or  
22  
23 appropriate analysis methods were used to adjust for important baseline confounding.  
24  
25 Five studies had serious bias in the selection of participants due to unclear inclusion  
26  
27 and exclusion criteria. Most of studies had low or moderate bias in classification of  
28  
29 interventions. No study provided the information of systematic difference between  
30  
31 experimental intervention and comparator groups due to a lack of comparison of two  
32  
33 intervention groups. All studies had low or moderate bias in missing data, in  
34  
35 measurement of outcomes, and in selection of the reported result. Overall, 28 studies  
36  
37 had moderate risk of bias, thirteen had serious risk of bias, and one had unclear  
38  
39 information regarding the risk of bias.  
40  
41  
42  
43  
44  
45

### 46 ***Meta-regression of clinical outcomes***

47  
48 A meta-regression analysis demonstrated that South American patients had  
49  
50 significantly longer mean duration of ICU admission prior to candidemia onset than  
51  
52 patients in Asia, Australian, Europe and North America (using Asia as the reference  
53  
54 group, South America had  $\beta = 25.83$ ,  $p = 0.0308$ ,  $R^2 = 0.097$ ). Other subgroup  
55  
56 meta-regression analyses did not reach statistical significance (Table 3). The level of  
57  
58 risk of bias (moderate/serious or no information) was also included in the  
59  
60

1  
2  
3 meta-regression analyses and the coefficient was not found to achieve statistical  
4  
5 significance.  
6  
7  
8  
9  
10  
11  
12  
13  
14  
15  
16  
17  
18  
19  
20  
21  
22  
23  
24  
25  
26  
27  
28  
29  
30  
31  
32  
33  
34  
35  
36  
37  
38  
39  
40  
41  
42  
43  
44  
45  
46  
47  
48  
49  
50  
51  
52  
53  
54  
55  
56  
57  
58  
59  
60

For peer review only

**Table 4. Quality assessment of included studies using ROBINS-I**

| <b>1<sup>st</sup> Author (year)</b>       | Bias due to confounding | Bias in selection of participants into the study | Bias in classification of interventions | Bias due to deviations from intended interventions | Bias due to missing data | Bias in measurement of outcomes | Bias in selection of the reported result | Overall risk of bias |
|-------------------------------------------|-------------------------|--------------------------------------------------|-----------------------------------------|----------------------------------------------------|--------------------------|---------------------------------|------------------------------------------|----------------------|
| Ding et al. (2018) <sup>[52]</sup>        | low                     | moderate                                         | low                                     | no information                                     | moderate                 | low                             | low                                      | moderate             |
| Zhao et al. (2018) <sup>[51]</sup>        | low                     | low                                              | no information                          | no information                                     | low                      | low                             | low                                      | moderate             |
| Baldesi et al. (2017) <sup>[54]</sup>     | low                     | moderate                                         | no information                          | no information                                     | low                      | low                             | low                                      | moderate             |
| Kawano et al. (2017) <sup>[56]</sup>      | serious                 | moderate                                         | low                                     | no information                                     | low                      | low                             | low                                      | serious              |
| Rudramurthy et al. (2017) <sup>[55]</sup> | low                     | low                                              | low                                     | no information                                     | low                      | low                             | low                                      | moderate             |
| Tigen et al. (2017) <sup>[53]</sup>       | serious                 | moderate                                         | low                                     | no information                                     | low                      | low                             | low                                      | serious              |
| Yang et al. (2017) <sup>[26]</sup>        | low                     | low                                              | low                                     | no information                                     | low                      | low                             | moderate                                 | moderate             |
| Gong et al. (2016) <sup>[47]</sup>        | serious                 | moderate                                         | low                                     | no information                                     | low                      | low                             | low                                      | serious              |
| OrtízRuiz et al. (2016) <sup>[16]</sup>   | low                     | low                                              | low                                     | no information                                     | low                      | low                             | low                                      | moderate             |
| Pinhati et al. (2016) <sup>[58]</sup>     | moderate                | moderate                                         | low                                     | no information                                     | low                      | low                             | low                                      | moderate             |
| Playford et al. (2016) <sup>[57]</sup>    | low                     | moderate                                         | no information                          | no information                                     | low                      | low                             | low                                      | moderate             |
| Aguilar et al. (2015) <sup>[15]</sup>     | no information          | moderate                                         | low                                     | no information                                     | low                      | low                             | low                                      | moderate             |
| Chakrabarti et al. (2015) <sup>[29]</sup> | serious                 | low                                              | low                                     | no information                                     | low                      | low                             | low                                      | serious              |

|    |                                         |          |          |                |                |     |     |          |          |
|----|-----------------------------------------|----------|----------|----------------|----------------|-----|-----|----------|----------|
| 1  |                                         |          |          |                |                |     |     |          |          |
| 2  |                                         |          |          |                |                |     |     |          |          |
| 3  |                                         |          |          |                |                |     |     |          |          |
| 4  |                                         |          |          |                |                |     |     |          |          |
| 5  | Fochtmann et al. (2015)<br>[27]         | low      | moderate | low            | no information | low | low | low      | moderate |
| 6  |                                         |          |          |                |                |     |     |          |          |
| 7  |                                         |          |          |                |                |     |     |          |          |
| 8  | Kautzky et al. (2015) <sup>[59]</sup>   | serious  | low      | no information | no information | low | low | low      | serious  |
| 9  |                                         |          |          |                |                |     |     |          |          |
| 10 | Klingspor et al.(2015)<br>[28]          | low      | moderate | low            | no information | low | low | low      | moderate |
| 11 |                                         |          |          |                |                |     |     |          |          |
| 12 | Liao et al. (2015) <sup>[14]</sup>      | low      | moderate | low            | no information | low | low | low      | moderate |
| 13 |                                         |          |          |                |                |     |     |          |          |
| 14 | Karacaer et al. (2014) <sup>[31]</sup>  | moderate | moderate | low            | no information | low | low | low      | moderate |
| 15 |                                         |          |          |                |                |     |     |          |          |
| 16 | Colombo et al. (2014)<br>[32]           | low      | moderate | low            | no information | low | low | low      | moderate |
| 17 |                                         |          |          |                |                |     |     |          |          |
| 18 | Hu et al.(2014) <sup>[48]</sup>         | low      | moderate | low            | no information | low | low | low      | moderate |
| 19 |                                         |          |          |                |                |     |     |          |          |
| 20 | Lortholary et al. (2014)<br>[60]        | low      | serious  | low            | no information | low | low | moderate | serious  |
| 21 |                                         |          |          |                |                |     |     |          |          |
| 22 | Yapar et al. (2014) <sup>[61]</sup>     | moderate | moderate | low            | no information | low | low | low      | moderate |
| 23 |                                         |          |          |                |                |     |     |          |          |
| 24 | Giri et al. (2013) <sup>[30]</sup>      | serious  | moderate | low            | no information | low | low | low      | serious  |
| 25 |                                         |          |          |                |                |     |     |          |          |
| 26 | Guo et al.(2013) <sup>[49]</sup>        | low      | low      | low            | no information | low | low | low      | moderate |
| 27 |                                         |          |          |                |                |     |     |          |          |
| 28 | Tortorano et al.(2012)<br>[33]          | serious  | moderate | low            | no information | low | low | low      | serious  |
| 29 |                                         |          |          |                |                |     |     |          |          |
| 30 | Ylipalosaari et al. (2012)<br>[34]      | moderate | moderate | low            | no information | low | low | low      | moderate |
| 31 |                                         |          |          |                |                |     |     |          |          |
| 32 | Pasero et al. (2011) <sup>[35]</sup>    | low      | low      | low            | no information | low | low | low      | moderate |
| 33 |                                         |          |          |                |                |     |     |          |          |
| 34 | Han et al. (2010) <sup>[36]</sup>       | low      | serious  | no information | no information | low | low | low      | serious  |
| 35 |                                         |          |          |                |                |     |     |          |          |
| 36 | Pratikaki et al. (2009) <sup>[37]</sup> | moderate | low      | low            | no information | low | low | low      | moderate |
| 37 |                                         |          |          |                |                |     |     |          |          |
| 38 |                                         |          |          |                |                |     |     |          |          |
| 39 |                                         |          |          |                |                |     |     |          |          |
| 40 |                                         |          |          |                |                |     |     |          |          |
| 41 |                                         |          |          |                |                |     |     |          |          |
| 42 |                                         |          |          |                |                |     |     |          |          |
| 43 |                                         |          |          |                |                |     |     |          |          |
| 44 |                                         |          |          |                |                |     |     |          |          |
| 45 |                                         |          |          |                |                |     |     |          |          |
| 46 |                                         |          |          |                |                |     |     |          |          |

1  
2  
3  
4  
5  
6  
7  
8  
9  
10  
11  
12  
13  
14  
15  
16  
17  
18  
19  
20  
21  
22  
23  
24  
25  
26  
27  
28  
29  
30  
31  
32  
33  
34  
35  
36  
37  
38  
39  
40  
41  
42  
43  
44  
45  
46

|                                                 |                |          |                |                |          |     |     |                |
|-------------------------------------------------|----------------|----------|----------------|----------------|----------|-----|-----|----------------|
| Playford et al.(2009) <sup>[38]</sup>           | no information | low      | no information | no information | low      | low | low | no information |
| Holley et al.(2009) <sup>[39]</sup>             | low            | serious  | low            | no information | low      | low | low | serious        |
| Choi et al. (2009) <sup>[40]</sup>              | low            | serious  | low            | no information | low      | low | low | serious        |
| Yap et al. (2009) <sup>[50]</sup>               | no information | moderate | low            | no information | low      | low | low | moderate       |
| Chow et al. (2008) <sup>a</sup>                 | low            | low      | low            | no information | low      | low | low | moderate       |
| Chow et al. (2008) <sup>b</sup> <sup>[41]</sup> | low            | moderate | low            | no information | low      | low | low | moderate       |
| Bougnoux et al. (2008) <sup>[42]</sup>          | no information | low      | low            | no information | low      | low | low | moderate       |
| Girão et al. (2008) <sup>[43]</sup>             | no information | serious  | low            | no information | low      | low | low | moderate       |
| Dimopoulos et al. (2008) <sup>[44]</sup>        | low            | low      | low            | no information | low      | low | low | moderate       |
| Dimopoulos et al. (2007) <sup>[45]</sup>        | serious        | low      | low            | no information | low      | low | low | serious        |
| Jordà-Marcos et al. (2007) <sup>[62]</sup>      | low            | moderate | low            | no information | low      | low | low | moderate       |
| Piazza et al. (2004) <sup>[63]</sup>            | serious        | low      | moderate       | no information | moderate | low | low | serious        |
| Michalopoulos et al. (2003) <sup>[46]</sup>     | low            | low      | no information | no information | low      | low | low | moderate       |

---

<sup>a</sup>, Chow JK<sup>1</sup>, Golan Y, Ruthazer R, Karchmer AW, Carmeli Y, Lichtenberg D, Chawla V, Young J, Hadley S. Factors associated with candidemia caused by non-albicans Candida species versus Candida albicans in the intensive care unit. Clin Infect Dis. 2008 Apr 15;46(8):1206-13. doi: 10.1086/529435.



1  
2  
3  
4  
5 <sup>b</sup>, Chow JK<sup>1</sup>, Golan Y, Ruthazer R, Karchmer AW, Carmeli Y, Lichtenberg DA, Chawla V, Young JA, Hadley S. Risk factors for albicans and non-albicans candidemia in  
6 the intensive care unit. Crit Care Med. 2008 Jul;36(7):1993-8. doi: 10.1097/CCM.0b013e31816fc4cd.  
7  
8  
9  
10  
11  
12  
13  
14  
15  
16  
17  
18  
19  
20  
21  
22  
23  
24  
25  
26  
27  
28  
29  
30  
31  
32  
33  
34  
35  
36  
37  
38  
39  
40  
41  
42  
43  
44  
45  
46

For peer review only

### Publication bias

Egger's test showed potential publication bias for length of hospital stay (1-tailed  $P < 0.001$ ) and duration of ICU admission prior to candidemia onset (1-tailed  $P = 0.004$ ); there was no significant publication bias for length of ICU stay (1-tailed  $P = 0.37$ ) and overall mortality (1-tailed  $P = 0.38$ ). The classic fail-safe  $N$  tests indicated that the number of missing studies which would be needed to make the  $P$ -values of the summary effect become insignificant, was 65,685 for length of stay, 2,304 for length of ICU stay, 89,242 for duration of ICU admission prior to candidemia onset, and 34,263 for overall mortality. These results indicated that the significance of the observed effects of the meta-analyses would not be influenced by the inclusion of additional studies (Figure 3A-C).

### Data sharing

No additional data is available.

## DISCUSSION

The current meta-analysis demonstrated that the pooled mean of duration of ICU admission prior to candidemia varied from approximately 17 days in Asia, to 19 days in Europe and 46 days in South America. Most of the IC patients had received broad-spectrum antibiotics (89%), and the mean duration of antibiotic therapy prior to candidemia onset was nearly 18 days. The pooled mean mortality rate was approximately 49%. There was no significant difference in the length of hospital stay or overall mortality between patients with and without *C. albicans*, but the mean length of ICU stay was greater for patients with *C. albicans* compared to those patients without *C. albicans*.

1  
2  
3 As for the study design, eight were case-control or cross-sectional studies, and  
4  
5 the remaining 33 were retrospective or prospective cohort studies (Table 1). Eleven  
6  
7 studies were designed to compare patients with and without candidemia. Five studies  
8  
9 compared patients with infection of *C. albicans* vs. those infected with another  
10  
11 *Candida* strain, and only one study compared ICU-acquired candidemia vs. non-ICU  
12  
13 acquired candidemia [34]. Eight studies were performed in Chinese hospitals (Table  
14  
15 1). Two studies evaluated patients with *Candida albicans* vs. non-*Candida albicans*  
16  
17 infection. One study compared patients with catheter-related *Candida* bloodstream  
18  
19 infection (CRCBSI) vs. non-CRCBSI, and another study compared patients with a  
20  
21 fluconazole-resistant vs. fluconazole-sensitive (Flu-S) infection.  
22  
23  
24  
25

26 Fewer than half of the studies (n=18) were conducted in general or  
27  
28 multi-disciplinary ICUs, with the rest in SICUs, in the cardio-surgical/cardiothoracic  
29  
30 ICUs (CICU) [46], or in medical ICUs [36]. This suggests that invasive candidiasis is  
31  
32 a common problem in critically ill patients regardless of the ICU type. The mean  
33  
34 length of hospital stay ranged from 4 (early-onset group) to 54 days, and the mean  
35  
36 length of ICU stay ranged from 7 days to 60 days (Table 2). In 9 studies, median  
37  
38 lengths of ICU stay were  $\leq 10$  days prior to onset of IC, and the overall mortality in  
39  
40 ICU patients with candidemia in those studies ranged from 10.6% to 65.8%. In those  
41  
42 studies with median lengths of ICU stay  $> 10$  days prior to onset of IC, the overall  
43  
44 mortality ranged from 13.6% to 96.0%.  
45  
46  
47  
48

49 The durations of ICU stay varied widely prior to candidemia onset which  
50  
51 indicated the time and circumstances involved in encountering ICU-acquired risk  
52  
53 factors might differ among critically ill patients. As we have mentioned previously,  
54  
55 one major cause of severe candidiasis is the endogenous colonization of *Candida*  
56  
57 species that requires a 7 to 10-day period for the development of IC after exposure to  
58  
59  
60

1  
2  
3 the risk factors [20]. In addition, the median time for obtaining positive blood cultures  
4 was 2–3 days (possibly up to  $\geq 7$  days) [2]. Thus, for a patient with the confirmed  
5  
6 diagnosis of candidemia at 8 days after ICU admission, the endogenous colonization  
7  
8 of *Candida* species might have actually occurred on or before the first day of ICU  
9  
10 admission. Similarly, for a patient with the confirmed diagnosis of candidemia at  
11  
12 12-13 days after ICU admission, the endogenous colonization of *Candida* species  
13  
14 might have occurred 3-5 days after ICU admission.  
15  
16  
17  
18

19  
20 One main risk factor for candidemia was the systemic antibiotic use [16]. In a  
21  
22 previous study of pediatric ICUs, it was reported that treatment with vancomycin or  
23  
24 anti-anaerobic antibiotics for  $>3$  days was independently associated with the  
25  
26 development of candidemia [2], but only in an unadjusted analysis [16]. A study in  
27  
28 Hong Kong found that candidemia occurred in patients within 6 days of ICU  
29  
30 admission, and more than 97.0% of patients infected with fungi of *Candida* species  
31  
32 had received  $>48$  hours of antibiotic treatment [64]. Overuse and prolonged use of  
33  
34 broad-spectrum antibiotics have been closely associated with candidemia in China  
35  
36 and India [65, 66], so it's reasonable to suspect a link between overuse of  
37  
38 broad-spectrum antibiotics and early-onset of candidemia after ICU admission.  
39  
40  
41 Regardless of geographical differences, most patients with IC received  
42  
43 broad-spectrum antibiotic treatment prior to candidemia onset in the ICU. However,  
44  
45 due to a lack of sufficient data, potential correlation between prolonged exposure to  
46  
47 broad-spectrum antibiotics and the time of candidemia onset after ICU admission  
48  
49 could not be assessed. Further explanations of the longer duration of ICU admission  
50  
51 prior to candidemia onset in South America than in Asia/Europe/US/Australia also  
52  
53 could not be determined in this systematic review.  
54  
55  
56  
57

58 Results of this study showed no significant difference in the length of hospital stay  
59  
60

1  
2  
3 prior to the development of IC and in the overall mortality between patients with and  
4 without invasive infection of *C. albicans*. This may be due to the fact that clinical  
5 presentation and the treatment of patients with candidemia caused by *C. albicans* and  
6 non-*C. albicans* were indistinguishable [67]. Although it was found that the mortality  
7 rates in patients with *C. albicans* and non-*C. albicans* was similar, the susceptibilities  
8 of these strains to anti-fungal agents were different [21, 68, 69].  
9

10  
11 This systematic review had several limitations. Because this systematic review  
12 lacks a pre-specified protocol and the preliminary registration, biased post hoc  
13 decisions in the reviewing process may occur. In addition, a number of the trials  
14 reported outcomes using median (range) and/or median (IQR), and in order to  
15 combine these results, the sample means and standard deviations for those trials were  
16 estimated using a method proposed by Wan et al. [24], based under the assumption  
17 that data were normally distributed. Across the meta-analysis, however, medians and  
18 quartiles were often reported when data did not follow a normal distribution [23],  
19 which may have confounded the results. Results of the quality assessment also  
20 indicated that potential biases from confounders may be present. High heterogeneity  
21 existed in both overall and subgroup analyses, suggesting complexity of the risk  
22 factors causing IC and candidemia (Supplementary Table S2).  
23  
24  
25  
26  
27  
28  
29  
30  
31  
32  
33  
34  
35  
36  
37  
38  
39  
40  
41  
42  
43

44 Although different designs, regional differences, and risks of bias may contribute  
45 to the heterogeneity between groups, there may be other potential factors that requires  
46 further study. Factors such as comorbidities, severity of illness, and invasive  
47 procedures (e.g., hemodialysis, invasive mechanical ventilation, total parenteral  
48 nutrition, surgery, and immunosuppression), were not taken into account in this  
49 analysis. Publication bias may have existed in some analyzed outcomes as well.  
50  
51  
52  
53  
54  
55  
56  
57

58 This meta analysis finds that patients who had longer length of ICU stay were  
59  
60

1  
2  
3 more likely to develop candidemia. Therefore, early detection and therapeutic  
4  
5 intervention should be considered in the ICU to reduce potential risk of fungal  
6  
7 infection and its complications, which will help conserving valuable medical  
8  
9 resources and ultimately saving more lives.  
10  
11  
12  
13

### 14 **Acknowledgements**

15  
16  
17 The medical writing and editorial assistance were provided by Elizabeth Goodwin and  
18  
19 Prof. Jerry Tseng of MedCom Asia Inc., China. This assistance was funded by MSD  
20  
21 China. The authors initiated the concept for this systematic review and are responsible  
22  
23 for the content of the manuscript.  
24  
25

26 **Competing interests:** The authors declare that they have no competing interests  
27

28 **Funding:** None  
29

### 30 **Authors' contributions:**

31  
32  
33 ZDZ: guarantor of integrity of the entire study; study concepts; study design;  
34  
35 definition of intellectual content; manuscript editing; manuscript review.  
36  
37

38 RZ: guarantor of integrity of the entire study; study concepts; study design; definition  
39  
40 of intellectual content; manuscript editing; manuscript review.  
41  
42

43 ZGL: guarantor of integrity of the entire study; study concepts; study design;  
44  
45 definition of intellectual content; manuscript editing; manuscript review.  
46  
47

48 XCM: guarantor of integrity of the entire study; study concepts; study design;  
49  
50 definition of intellectual content; manuscript editing; manuscript review.  
51  
52

53 **Data sharing statement:** No additional data are available.  
54  
55  
56  
57  
58  
59  
60

## REFERENCES

1. Calandra T, Roberts JA, Antonelli M, et al. Diagnosis and management of invasive candidiasis in the ICU: an updated approach to an old enemy. *Crit Care* 2016;20:125.
2. Pappas PG, Kauffman CA, Andes DR, et al. Executive Summary: Clinical Practice Guideline for the Management of Candidiasis: 2016 Update by the Infectious Diseases Society of America. *Clin Infect Dis* 2016;62:409-17.
3. Bassetti M, Peghin M, Timsit JF. The current treatment landscape: candidiasis. *J Antimicrob Chemother.* 2016;71:ii13-ii22.
4. Yapar N. Epidemiology and risk factors for invasive candidiasis. *Ther Clin Risk Manag.* 2014;10:95-105.
5. Strollo S, Lionakis MS, Adjemian J, et al. Epidemiology of Hospitalizations Associated with Invasive Candidiasis, United States, 2002-2012. *Emerg Infect Dis.* 2016;23:7-13.
6. Leon C, Ostrosky-Zeichner L, Schuster M. What's new in the clinical and diagnostic management of invasive candidiasis in critically ill patients. *Intensive Care Med* 2014;40:808-19.
7. Yang SP, Chen YY, Hsu HS, et al. A risk factor analysis of healthcare-associated fungal infections in an intensive care unit: a retrospective cohort study. *BMC Infect Dis* 2013;13:10.
8. Montagna MT, Lovero G, Borghi E, et al. Candidemia in intensive care unit: a nationwide prospective observational survey (GISIA-3 study) and review of the European literature from 2000 through 2013. *Eur Rev Med Pharmacol Sci.* 2014;18:661-74.

- 1  
2  
3 9. Bassetti M, Garnacho-Montero J, Calandra T, et al. Intensive care medicine  
4  
5 research agenda on invasive fungal infection in critically ill patients. *Intensive*  
6  
7 *Care Med.* 2017;43:1225-38.  
8  
9
- 10 10. Clancy CJ, Nguyen MH. The end of an era in defining the optimal treatment of  
11  
12 invasive candidiasis. *Clin Infect Dis.* 2012;54:1123-5.  
13  
14
- 15 11. Kullberg BJ, Arendrup MC. Invasive Candidiasis. *N Engl J Med.*  
16  
17 2016;374:794-5.  
18
- 19 12. Paphitou NI, Ostrosky-Zeichner L, Rex JH. Rules for identifying patients at  
20  
21 increased risk for candidal infections in the surgical intensive care unit: an  
22  
23 approach to developing practical criteria for systematic use in antifungal  
24  
25 prophylaxis trials. *Med Mycol*2005;43:235–43  
26  
27
- 28 13. Ostrosky-Zeichner L, Sable C, Sobel J, et al. Multicenter retrospective  
29  
30 development and validation of a clinical prediction rule for  
31  
32 nosocomial invasive candidiasis in the intensive care setting. *Eur J Clin*  
33  
34 *Microbiol Infect Dis.* 2007;26:271-6.  
35  
36
- 37 14. Liao X, Qiu H, Li R, et al. Risk factors for fluconazole-resistant invasive  
38  
39 candidiasis in intensive care unit patients: An analysis from the China Survey  
40  
41 of Candidiasis study. *J Crit Care* 2015;30:862.e861-5.  
42  
43  
44
- 45 15. Aguilar G, Delgado C, Corrales I, et al. Epidemiology of invasive candidiasis in  
46  
47 a surgical intensive care unit: an observational study. *BMC Res Notes*  
48  
49 2015;8:491.  
50
- 51 16. Ortiz Ruiz G, Osorio J, Valderrama S, et al. Risk factors for candidemia in  
52  
53 non-neutropenic critical patients in Colombia. *Med Intensiva.*2016;40:139-44.  
54  
55
- 56 17. Ostrosky-Zeichner L. Clinical prediction rules for invasive candidiasis in the  
57  
58 ICU: ready for prime time? *Crit Care.* 2011;15:189.  
59  
60



- 1  
2  
3 18. León C, Ruiz-Santana S, Saavedra P, et al. Contribution of Candida biomarkers  
4 and DNA detection for the diagnosis of invasive candidiasis in ICU patients  
5 with severe abdominal conditions. *Crit Care*. 2016;20:149.  
6  
7  
8  
9  
10 19. Martín-Mazuelos E, Loza A, Castro C, et al.  $\beta$ -D-Glucan and Candida albicans  
11 germ tube antibody in ICU patients with invasive candidiasis. *Intensive Care*  
12 *Med*. 2015;41:1424-32.  
13  
14  
15  
16  
17 20. Eggimann P, Que YA, Revelly JP, Pagani JL. Preventing invasive *Candida*  
18 infections. Where could we do better? *J Hosp Infect*. 2015;89:302-8.  
19  
20  
21 21. Sterne JAC, Hernán MA, Reeves BC, et al. ROBINS-I: a tool for assessing risk  
22 of bias in non-randomized studies of interventions. *BMJ*. 2016; 355; i4919.  
23  
24  
25  
26 22. Sterne JAC, Higgins JPT, Elbers RG, Reeves BC and the development group for  
27 ROBINS-I. Risk Of Bias In Non-randomized Studies of Interventions  
28 (ROBINS-I): detailed guidance, updated 12 October 2016. Available from  
29 <http://www.riskofbias.info>.  
30  
31  
32  
33  
34  
35 23. Zeng X, Zhang Y, Kwong JS, Zhang C, Li S, Sun F, Niu Y, Du L. The  
36 methodological quality assessment tools for preclinical and clinical studies,  
37 systematic review and meta-analysis, and clinical practice guideline: a  
38 systematic review. *J Evid Based Med*, 2015, 8(1):2-10.)  
39  
40  
41  
42  
43  
44 24. Wan X, Wang W, Liu J, Tong T. Estimating the sample mean and standard  
45 deviation from the sample size, median, range and/or interquartile range. *BMC*  
46 *Med Res Methodol*. 2014;14:135.  
47  
48  
49  
50  
51 25. Sterne JA, Sutton AJ, Ioannidis JP, et al. Recommendations for examining and  
52 interpreting funnel plot asymmetry in meta-analyses of randomised controlled  
53 trials. *BMJ*. 2011 Jul 22;343:d4002.  
54  
55  
56  
57  
58  
59  
60

- 1  
2  
3 26. Yang Y, Guo F, Kang Y, et al. Epidemiology, clinical characteristics, and risk  
4 factors for mortality of early- and late-onset invasive candidiasis in intensive  
5 care units in China. *Medicine (Baltimore)*. 2017;96:e7830.  
6  
7  
8  
9  
10 27. Fochtmann A, Forstner C, Haggmann M, et al. Predisposing factors for  
11 candidemia in patients with major burns. *Burns*.2015;41:326-32.  
12  
13  
14 28. Klingspor L, Tortorano AM, Peman J, et al. Invasive *Candida* infections in  
15 surgical patients in intensive care units: a prospective, multicentre survey  
16 initiated by the European Confederation of Medical Mycology (ECMM)  
17 (2006-2008). *Clin Microbiol Infect*.2015;21:87.e81-7.e10.  
18  
19  
20  
21  
22  
23 29. Chakrabarti A, Sood P, Rudramurthy SM, et al. Incidence, characteristics and  
24 outcome of ICU-acquired candidemia in India. *Intensive Care*  
25 *Med*.2015;41:285-95.  
26  
27  
28  
29  
30 30. Giri S, Kindo AJ, Kalyani J. Candidemia in intensive care unit patients: a  
31 one-year study from a tertiary center in South India. *J Postgrad Med*.  
32 2013;59(3):190-5.  
33  
34  
35  
36  
37 31. Karacaer Z, Oncul O, Turhan V, Gorenek L, Ozyurt M. A surveillance of  
38 nosocomial candida infections: epidemiology and influences on mortality in  
39 intensive care units. *Pan Afr Med J*.2014;19:398.  
40  
41  
42  
43  
44 32. Colombo AL, Guimaraes T, Sukienik T, et al. Prognostic factors and historical  
45 trends in the epidemiology of candidemia in critically ill patients: an analysis of  
46 five multicenter studies sequentially conducted over a 9-year period. *Intensive*  
47 *Care Med*.2014;40:1489-98.  
48  
49  
50  
51  
52  
53 33. Tortorano AM, Dho G, Prigitano A, et al. Invasive fungal infections in the  
54 intensive care unit: a multicentre, prospective, observational study in Italy  
55 (2006-2008). *Mycoses*.2012;55:73-9.  
56  
57  
58  
59  
60

- 1  
2  
3 34. Ylipalosaari P, Ala-Kokko TI, Karhu J, et al. Comparison of the epidemiology,  
4 risk factors, outcome and degree of organ failures of patients with candidemia  
5 acquired before or during ICU treatment. Crit Care. 2012;16:R62.  
6  
7  
8  
9  
10 35. Pasero D, De Rosa FG, Rana NK, et al. Candidemia after cardiac surgery in the  
11 intensive care unit: an observational study. Interact CardiovascThorac  
12 Surg.2011;12:374-8.  
13  
14  
15  
16  
17 36. Han SS, Yim JJ, Yoo CG, et al. Clinical characteristics and risk factors for  
18 nosocomial candidemia in medical intensive care units: experience in a single  
19 hospital in Korea for 6.6 years. J Korean Med Sci.2010;25:671-6.  
20  
21  
22  
23  
24 37. Pratikaki M, Platsouka E, Sotiropoulou C, et al. Epidemiology, risk factors for  
25 and outcome of candidaemia among non-neutropenic patients in a Greek  
26 intensive care unit. Mycoses.2011;54:154-61.  
27  
28  
29  
30  
31 38. Playford EG, Lipman J, Kabir M, et al. Assessment of clinical risk predictive  
32 rules for invasive candidiasis in a prospective multicentre cohort of ICU  
33 patients. Intensive Care Med.2009;35:2141-5.  
34  
35  
36  
37  
38 39. Holley A, Dulhunty J, Blot S, et al. Temporal trends, risk factors and outcomes  
39 in *albicans* and non-*albicans* candidaemia: an international epidemiological  
40 study in four multidisciplinary intensive care units. Int J Antimicrob  
41 Agents.2009;33:554.e551-7.  
42  
43  
44  
45  
46  
47 40. Choi HK, Jeong SJ, Lee HS, et al. Blood stream infections by *Candida*  
48 *glabrata* and *Candida krusei*: A single-center experience. Korean J Intern  
49 Med. 2009;24:263-9.  
50  
51  
52  
53  
54 41. Chow JK, Golan Y, Ruthazer R, et al. Risk factors for *albicans* and non-*albicans*  
55 candidemia in the intensive care unit. Crit Care Med.2008;36:1993-8.  
56  
57  
58  
59  
60

- 1  
2  
3 42. Bougnoux ME, Kac G, Aegerter P, d'Enfert C, Fagon JY. Candidemia and  
4  
5 candiduria in critically ill patients admitted to intensive care units in France:  
6  
7 incidence, molecular diversity, management and outcome. *Intensive Care*  
8  
9 *Med.*2008;34:292-9.  
10  
11  
12 43. Girão E, Levin AS, Basso M, et al. Seven-year trend analysis of nosocomial  
13  
14 candidemia and antifungal (fluconazole and caspofungin) use in Intensive Care  
15  
16 Units at a Brazilian University Hospital. *Med Mycol.*2008;46:581-8.  
17  
18  
19 44. Dimopoulos G, Ntziora F, Rachiotis G, Armaganidis A, Falagas ME. *Candida*  
20  
21 *albicans* versus non-*albicans* intensive care unit-acquired bloodstream  
22  
23 infections: differences in risk factors and outcome.  
24  
25 *AnesthAnalg.*2008;106:523-9.  
26  
27  
28 45. Dimopoulos G, Karabinis A, Samonis G, Falagas ME. Candidemia in  
29  
30 immunocompromised and immunocompetent critically ill patients: a  
31  
32 prospective comparative study. *Eur J ClinMicrobiol Infect.*  
33  
34 *Dis.*2007;26:377-84.  
35  
36  
37 46. Michalopoulos AS, Geroulanos S, Mentzelopoulos SD. Determinants of  
38  
39 candidemia and candidemia-related death in cardiothoracic ICU patients.  
40  
41 *Chest.*2003;124:2244-55.  
42  
43  
44 47. Gong X, Luan T, Wu X, et al. Invasive candidiasis in intensive care  
45  
46 units in China: Risk factors and prognoses of *Candida albicans* and  
47  
48 non-*albicans* *Candida* infections. *Am J Infect Control.* 2016;44:e59-63.  
49  
50  
51 48. Hu B, Du Z, Kang Y, et al. Catheter-related *Candida* bloodstream infection in  
52  
53 intensive care unit patients: a subgroup analysis of the China-SCAN study.  
54  
55 *BMC Infect Dis.*2014;14:594.  
56  
57  
58  
59  
60

- 1  
2  
3 49. Guo F, Yang Y, Kang Y, et al. Invasive candidiasis in intensive care units in  
4  
5 China: a multicentre prospective observational study. *J Antimicrob*  
6  
7 *Chemother.*2013;68:1660-8.  
8  
9
- 10 50. Yap HY, Kwok KM, Gomersall CD, et al. Epidemiology and outcome of  
11  
12 *Candida* bloodstream infection in an intensive care unit in Hong Kong. *Hong*  
13  
14 *Kong Med J.*2009;15:255-61.  
15  
16
- 17 51. Zhao H, Wong C, Wu P, et al. An analysis of mortality and clinical  
18  
19 characteristics of ICU-acquired candidemia patients. *Chin Crit Care*  
20  
21 *Med.*2018;30(10):929-32.  
22  
23
- 24 52. Ding R, Ji Y, Liu B, et al. Risk factors for mortality in cases of intensive care  
25  
26 unit-acquired candidemia: a 5.5-year, single-center, retrospective study. *Int J*  
27  
28 *Clin Exp Med.*2018;11(9):9950-7.  
29  
30
- 31 53. Tigen ET, Bilgen H, Gurun HP, et al. Risk factors, characteristics, and outcomes  
32  
33 of candidemia in an adult intensive care unit in Turkey. *Am J Infec*  
34  
35 *Control.*2017;45:e61-3.  
36  
37
- 38 54. Baldesi O, Bailey S, Ruckly S, et al. ICU-acquired candidemia in France:  
39  
40 epidemiology and temporal trends, 2004-2013-a study from REA-RAISIN  
41  
42 network. *J Infection.*2017;75:59-67.  
43  
44
- 45 55. Rudramurthy SM, Chakrabarti A, Paul RA, et al. *Candida auris* candidemia in  
46  
47 Indian ICUs: analysis of risk factors. *J Antimicrob*  
48  
49 *Chemother.*2017;72:1794-1801.  
50  
51
- 52 56. Kawano Y, Togawa A, Nakamura Y, et al. Prognostic factors for candidemia in  
53  
54 intensive care unit patients: a retrospective analysis. *Singapore Med*  
55  
56 *J.*2017;58(4):196-200.  
57  
58  
59  
60

- 1  
2  
3 57. Playford EG, Lipman J, Jones M, et al. Problematic dichotomization of risk for  
4  
5 intensive care unit (ICU)-acquired invasive candidiasis: results using a  
6  
7 risk-predictive model to categorize 3 levels of risk from a multi-center  
8  
9 prospective cohort of Australian ICU patients. *Clin Infect*  
10  
11 *Dis.*2016;63(11):1463-9.  
12  
13  
14 58. Pinhati HM, Casulari LA, Souza AC, et al. *BMC Infect Dis.*2016;16(433):1-6.  
15  
16 59. Kautzky S, Staudinger T, Presteri E. Invasive candida infection in patients of a  
17  
18 medical intensive care unit. *Wien Klin Wochenschr.*2015;127: 132-42.  
19  
20  
21 60. Lortholary O, Renaudat C, Sitbon K, et al. The risk and clinical outcome of  
22  
23 candidemia depending on underlying malignancy. *Intensive Care*  
24  
25 *Med.*2017;43:652-662.  
26  
27  
28 61. Yapar N, Akan M, Avkan-Oguz V, et al. Risk factors, incidence and outcome of  
29  
30 candidemia in a Turkish intensive-care unit: a five-year retrospective cohort  
31  
32 study. *Anaesth Pain Intensive Care.*2014;18(3): 265-71.  
33  
34  
35 62. Jorda-Marcos R, Alvarez-Lerma F, Jurado M, et al. Risk factors for candidemia  
36  
37 in critically ill patients: a prospective surveillance study.  
38  
39 *Mycoses.*2007;50:302-10.  
40  
41  
42 63. Piazza O, Boccia MC, Iasiello A, et al. Candidemia in intensive care patients.  
43  
44 *Minerva Anesthesiol.*2003;70:63-9.  
45  
46  
47 64. Wang J, Wang P, Wang X, Zheng Y, Xiao Y. Use and prescription of antibiotics  
48  
49 in primary health care settings in China. *JAMA Intern Med.* 2014;174:1914-20.  
50  
51  
52 65. Agrawal C, Biswas D, Gupta A, Chauhan BS. Antibiotic overuse as a risk factor  
53  
54 for candidemia in an Indian pediatric ICU. *Indian J Pediatr.* 2015;82:530-6.  
55  
56  
57  
58  
59  
60

- 1  
2  
3 66. Cheng MF, Yang YL, Yao TJ, et al. Risk factors for fatal candidemia caused by  
4  
5 *Candida albicans* and non-*albicans Candida* species. BMC Infect  
6  
7 Dis.2005;5:22.  
8  
9  
10 67. Cheng MF, Yu KW, Tang RB, et al. Distribution and antifungal susceptibility of  
11  
12 *Candida* species causing candidemia from 1996 to 1999. DiagnMicrobiol Infect  
13  
14 Dis.2004;48:33-7.  
15  
16  
17 68. Yang YL, Ho YA, Cheng HH, Ho M, Lo HJ. Susceptibilities of *Candida* species  
18  
19 to amphotericin B and fluconazole: the emergence of fluconazole resistance in  
20  
21 *Candida tropicalis*. Infect Control Hosp Epidemiol.2004;25:60-4.  
22  
23  
24 69. Yang YL, Cheng HH, Lo HJ. In vitro activity of voriconazole against *Candida*  
25  
26 species isolated in Taiwan. Int J Antimicrob Agents.2004;24:294-6.  
27  
28  
29  
30  
31  
32  
33  
34  
35  
36  
37  
38  
39  
40  
41  
42  
43  
44  
45  
46  
47  
48  
49  
50  
51  
52  
53  
54  
55  
56  
57  
58  
59  
60

1  
2  
3  
4 **Figure legends**  
5  
6  
7

8 **Figure 1.** PRISMA flow diagram of study selection  
9

10  
11 **Figure 2.** Meta-analysis of *C. albicans* vs. non-*C. albicans* for A) length of hospital  
12  
13  
14 stay; B) ICU length of stay; and C) Overall mortality  
15  
16

17  
18 **Figure 3.** Funnel plot for A) length of hospital stay; B) ICU length of stay; C)  
19  
20 duration of ICU admission prior to candidemia onset  
21  
22  
23  
24  
25  
26  
27  
28  
29  
30  
31  
32  
33  
34  
35  
36  
37  
38  
39  
40  
41  
42  
43  
44  
45  
46  
47  
48  
49  
50  
51  
52  
53  
54  
55  
56  
57  
58  
59  
60



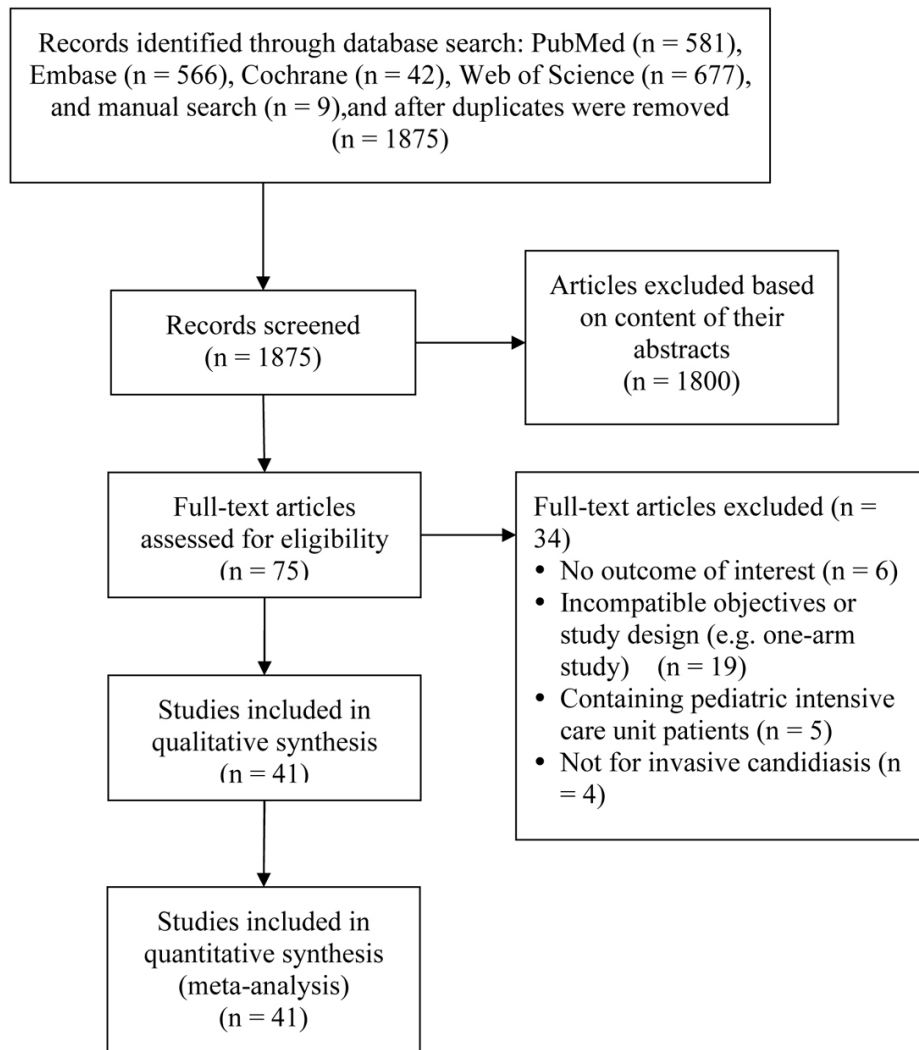

Figure 1

99x106mm (300 x 300 DPI)

## Figure 2.

### A. Length of hospital stay (days)

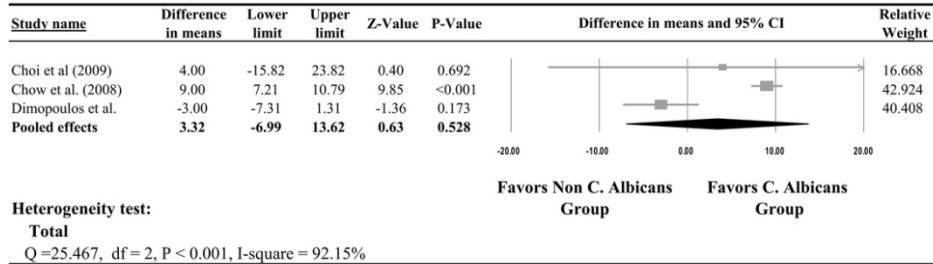

### B. ICU length of stay (days)

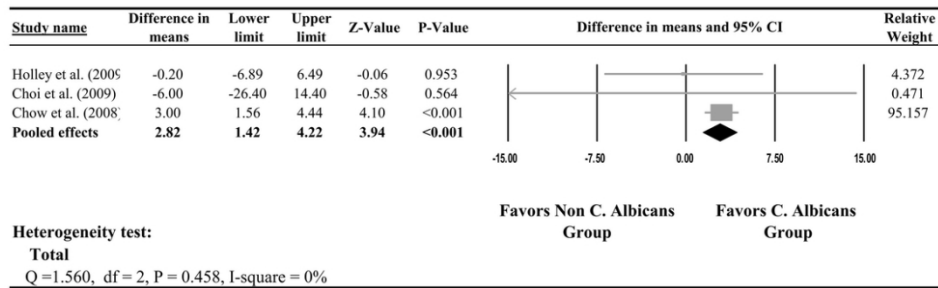

### C. Overall mortality

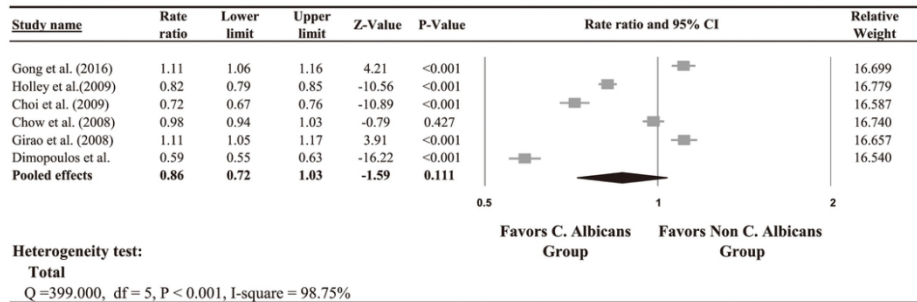

Figure 2

99x112mm (300 x 300 DPI)

1  
2  
3  
4  
5  
6  
7  
8  
9  
10  
11  
12  
13  
14  
15  
16  
17  
18  
19  
20  
21  
22  
23  
24  
25  
26  
27  
28  
29  
30  
31  
32  
33  
34  
35  
36  
37  
38  
39  
40  
41  
42  
43  
44  
45  
46  
47  
48  
49  
50  
51  
52  
53  
54  
55  
56  
57  
58  
59  
60

Figure 3A

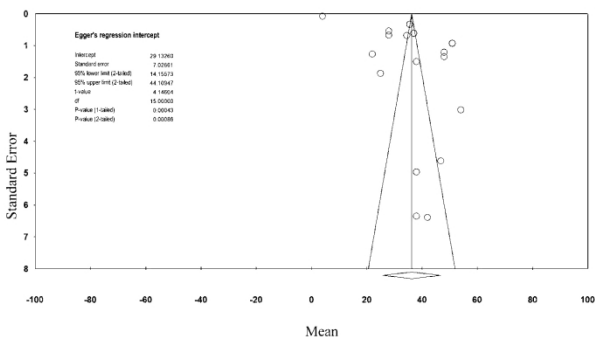

Figure 3B

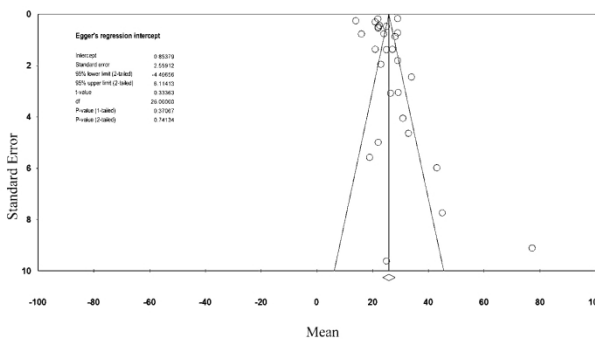

Figure 3C

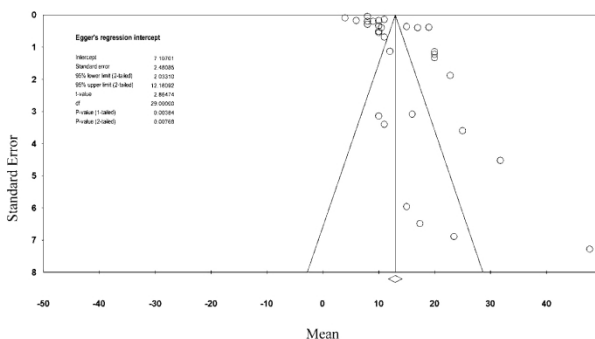

130x242mm (300 x 300 DPI)

Supplementary Table S1. Literature search through several databases and the results.

| Database            | Key words and the combination                                                 | Articles found through initial search (N) | Articles excluded based on selection criteria or were duplicates (N) | Articles qualified for full text review (N) | Articles selected for meta-analysis (ref. no.)          |
|---------------------|-------------------------------------------------------------------------------|-------------------------------------------|----------------------------------------------------------------------|---------------------------------------------|---------------------------------------------------------|
| PubMed*             | (candidiasis OR candidemia) AND (intensive care unit OR ICU) AND risk factors | 581                                       | 522                                                                  | 59                                          | #14, 15, 26-29, 30-35, 37-45, 47, 48, 51, 53-58, 60, 63 |
| Cochrane            | (candidiasis OR candidemia) AND (intensive care unit OR ICU) AND risk factors | 42                                        | 42                                                                   | 0                                           | -                                                       |
| Embase **           | (candidiasis OR candidemia) AND (intensive care unit OR ICU) AND risk factors | 566                                       | 560                                                                  | 6                                           | #36, 52, 59, 61                                         |
| Web of Science***   | (candidiasis OR candidemia) AND (intensive care unit OR ICU) AND risk factors | 677                                       | 676                                                                  | 1                                           | -                                                       |
| Manual search       |                                                                               | 9                                         | 0                                                                    | 9                                           | #16, 46, 49, 50, 62                                     |
| <b>Total number</b> |                                                                               | <b>1875</b>                               | <b>1800</b>                                                          | <b>75</b>                                   | <b>41</b>                                               |

\* PubMed search filters: Abstract available, English, Chinese, Human

\*\* Embase search filters: Abstract, English, Human

\*\*\* Web of Science search filters: Articles, English, Human

Supplementary Table S2. A supplementary information of heterogeneity test for overall studies or given subgroup for Table 3.

| Comparison                             | Length of hospital stay, days |         |                |         | Total length of ICU stay, days |        |                |         | Duration of ICU admission prior to candidemia onset, days |        |                |         | Length of hospital stay prior to ICU admission, days |       |                |         | Overall mortality rate |         |                |         |
|----------------------------------------|-------------------------------|---------|----------------|---------|--------------------------------|--------|----------------|---------|-----------------------------------------------------------|--------|----------------|---------|------------------------------------------------------|-------|----------------|---------|------------------------|---------|----------------|---------|
|                                        | Degrees of freedom            |         |                |         | Degrees of freedom             |        |                |         | Degrees of freedom                                        |        |                |         | Degrees of freedom                                   |       |                |         | Degrees of freedom     |         |                |         |
|                                        | of                            | Q       | I <sup>2</sup> | P-value | of                             | Q      | I <sup>2</sup> | P-value | of                                                        | Q      | I <sup>2</sup> | P-value | of                                                   | Q     | I <sup>2</sup> | P-value | of                     | Q       | I <sup>2</sup> | P-value |
| <b>Overall</b>                         | 16                            | 20197.0 | 99.92          | <0.001  | 27                             | 2690.9 | 99.00          | <0.001  | 30                                                        | 4686.2 | 99.36          | <0.001  | 4                                                    | 311.2 | 98.71          | <0.001  | 39                     | 26981.1 | 99.86          | <0.001  |
| <b>Overall optional<sup>abcd</sup></b> | <sup>a</sup> 13               | 850.7   | 98.47          | <0.001  | <sup>b</sup> 25                | 2626.7 | 99.05          | <0.001  | <sup>c</sup> 26                                           | 2649.8 | 99.02          | <0.001  |                                                      |       |                |         | <sup>d</sup> 35        | 24273.9 | 99.86          | <0.001  |
| <b>Subgroups</b>                       |                               |         |                |         |                                |        |                |         |                                                           |        |                |         |                                                      |       |                |         |                        |         |                |         |
| <b>Type of study</b>                   |                               |         |                |         |                                |        |                |         |                                                           |        |                |         |                                                      |       |                |         |                        |         |                |         |
| Prospective                            | 7                             | 568.3   | 98.77          | <0.001  | 12                             | 662.2  | 98.19          | <0.001  | 16                                                        | 1572.3 | 98.98          | <0.001  | 1                                                    | 0.9   | 0.35           | <0.001  | 20                     | 13805.2 | 99.86          | <0.001  |
| Retrospective                          | 8                             | 14000.4 | 99.94          | <0.001  | 14                             | 893.2  | 98.43          | <0.001  | 13                                                        | 2670.7 | 99.51          | <0.001  | 2                                                    | 28.39 | 92.95          | <0.001  | 18                     | 9479.2  | 99.81          | <0.001  |
| <b>Presence of neutropenia</b>         |                               |         |                |         |                                |        |                |         |                                                           |        |                |         |                                                      |       |                |         |                        |         |                |         |
| Neutropenia                            | 7                             | 6119.9  | 99.89          | <0.001  | 8                              | 2297.7 | 99.65          | <0.001  | 11                                                        | 3099.9 | 99.65          | <0.001  | 0                                                    | -     | -              | -       | 11                     | 15935.0 | 99.93          | <0.001  |
| Non-neutropenia                        | 1                             | 1.8     | 42.97          | 0.185   | 0                              |        |                | -       | 1                                                         | 0      | 0              | 1       | 0                                                    | -     | -              | -       | 2                      | 1388.4  | 99.86          | <0.001  |
| <b>Type of ICU</b>                     |                               |         |                |         |                                |        |                |         |                                                           |        |                |         |                                                      |       |                |         |                        |         |                |         |
| ICU                                    | 7                             | 11712.8 | 99.94          | <0.001  | 16                             | 930.6  | 98.28          | <0.001  | 13                                                        | 1589.8 | 99.18          | <0.001  | 1                                                    | 4.14  | 75.86          | 0.042   | 23                     | 13807.9 | 99.83          | <0.001  |
| SICU                                   |                               |         |                | -       | 1                              | 0.7    | 0.00           | 0.404   | 2                                                         | 31.2   | 93.60          | <0.001  | 0                                                    | -     | -              | -       | 2                      | 1005.5  | 99.80          | <0.001  |
| MICU                                   | 0                             |         |                | -       | 1                              | 6.2    | 83.92          | 0.013-  | 1                                                         | 0      | 0              | 1-      | 0                                                    | -     | -              | -       | 1                      | 14.3    | 92.99          | <0.001  |
| MICU+SICU                              | 7                             | 776.9   | 99.10          | <0.001  | 6                              | 713.7  | 99.16          | <0.001  | 11                                                        | 1539.5 | 99.29          | <0.001  | 0                                                    | -     | -              | -       | 10                     | 8098.2  | 99.88          | <0.001  |
| <b>C. Albicans</b>                     |                               |         |                |         |                                |        |                |         |                                                           |        |                |         |                                                      |       |                |         |                        |         |                |         |
| C. Albicans                            | 2                             | 114.7   | 98.26          | <0.001  | 2                              | 5.79   | 65.45          | 0.055   | 1                                                         | 0      | 0              | 1       |                                                      |       |                |         | 5                      | 1558.5  | 99.68          | <0.001  |

|                      |    |        |       |        |    |        |       |        |    |        |       |        |   |       |       |        |    |         |       |        |
|----------------------|----|--------|-------|--------|----|--------|-------|--------|----|--------|-------|--------|---|-------|-------|--------|----|---------|-------|--------|
| Non C. Albicans      | 1  | 2.262  | 55.78 | 0.133  | 1  | 5.4    | 81.37 | 0.021  | 0  | -      | -     | -      | - | -     | -     | -      |    |         |       |        |
| <b>Presence of</b>   |    |        |       |        |    |        |       |        |    |        |       |        |   |       |       |        |    |         |       |        |
| <b>IC/candidemia</b> |    |        |       |        |    |        |       |        |    |        |       |        |   |       |       |        |    |         |       |        |
| Candidemia           | 13 | 651.6  | 98.01 | <0.001 | 23 | 2620.0 | 99.12 | <0.001 | 24 | 2517.8 | 99.05 | <0.001 | 3 | 302.3 | 99.01 | <0.001 | 32 | 18755.6 | 99.83 | <0.001 |
| IC                   | 2  | 2588.9 | 99.92 | <0.001 | 3  | 17.0   | 82.33 | 0.001  | 5  | 1169.4 | 99.57 | <0.001 | 0 | -     | -     | -      | 6  | 3922.9  | 99.85 | <0.001 |
| <b>Region</b>        |    |        |       |        |    |        |       |        |    |        |       |        |   |       |       |        |    |         |       |        |
| Asia                 | 8  | 5464.6 | 99.85 | <0.001 | 11 | 738.6  | 98.51 | <0.001 | 11 | 2189.9 | 99.50 | <0.001 | 1 | 1.4   | 26.82 | 0.242  | 16 | 8966.6  | 99.82 | <0.001 |
| Europe               | 3  | 226.5  | 98.68 | <0.001 | 8  | 346.7  | 97.69 | <0.001 | 10 | 907.3  | 98.90 | <0.001 | 2 | 37.9  | 94.72 | <0.001 | 13 | 7933.8  | 99.84 | <0.001 |
| South America        | 0  | -      | -     | -      | 0  | -      | -     | -      | 2  | 19.6   | 89.80 | <0.001 | - | -     | -     | -      | 4  | 1960.7  | 99.80 | <0.001 |

Note: Certain subgroups have only 1 study (degree of freedom = 0).

<sup>a</sup> Excluded Yang et al. (2017),Gong et al (2016), Liao et al. (2015), and Guo et al. (2013).

<sup>b</sup> Excluded Yang et al. (2017), Gong et al (2016), Liao et al. (2015),and Guo et al. (2013).

<sup>c</sup> Excluded Yang et al. (2017),Gong et al (2016), Liao et al. (2015), and Hu et al. (2014).

<sup>d</sup> Excluded Yang et al. (2017), Gong et al (2016), Liao et al. (2015),and Hu et al. (2014).

Dash indicates no available.



# PRISMA 2009 Checklist

| Section/Topic                      | #  | Checklist Item                                                                                                                                                                                                                                                                                              | Reported on Page # |
|------------------------------------|----|-------------------------------------------------------------------------------------------------------------------------------------------------------------------------------------------------------------------------------------------------------------------------------------------------------------|--------------------|
| <b>TITLE</b>                       |    |                                                                                                                                                                                                                                                                                                             |                    |
| Title                              | 1  | Identify the report as a systematic review, meta-analysis, or both.                                                                                                                                                                                                                                         | 1                  |
| <b>ABSTRACT</b>                    |    |                                                                                                                                                                                                                                                                                                             |                    |
| Structured summary                 | 2  | Provide a structured summary including, as applicable: background; objectives; data sources; study eligibility criteria, participants, and interventions; study appraisal and synthesis methods; results; limitations; conclusions and implications of key findings; systematic review registration number. | 2                  |
| <b>INTRODUCTION</b>                |    |                                                                                                                                                                                                                                                                                                             |                    |
| Rationale                          | 3  | Describe the rationale for the review in the context of what is already known.                                                                                                                                                                                                                              | 5                  |
| Objectives                         | 4  | Provide an explicit statement of questions being addressed with reference to participants, interventions, comparisons, outcomes, and study design (PICOS).                                                                                                                                                  | 6                  |
| <b>METHODS</b>                     |    |                                                                                                                                                                                                                                                                                                             |                    |
| Protocol and registration          | 5  | Indicate if a review protocol exists, if and where it can be accessed (e.g., Web address), and, if available, provide registration information including registration number.                                                                                                                               | N/A                |
| Eligibility criteria               | 6  | Specify study characteristics (e.g., PICOS, length of follow-up) and report characteristics (e.g., years considered, language, publication status) used as criteria for eligibility, giving rationale.                                                                                                      | 6                  |
| Information sources                | 7  | Describe all information sources (e.g., databases with dates of coverage, contact with study authors to identify additional studies) in the search and date last searched.                                                                                                                                  | 6                  |
| Search                             | 8  | Present full electronic search strategy for at least one database, including any limits used, such that it could be repeated.                                                                                                                                                                               | 6                  |
| Study selection                    | 9  | State the process for selecting studies (i.e., screening, eligibility, included in systematic review, and, if applicable, included in the meta-analysis).                                                                                                                                                   | 7                  |
| Data collection process            | 10 | Describe method of data extraction from reports (e.g., piloted forms, independently, in duplicate) and any processes for obtaining and confirming data from investigators.                                                                                                                                  | 7                  |
| Data items                         | 11 | List and define all variables for which data were sought (e.g., PICOS, funding sources) and any assumptions and simplifications made.                                                                                                                                                                       | 8                  |
| Risk of bias in individual studies | 12 | Describe methods used for assessing risk of bias of individual studies (including specification of whether this was done at the study or outcome level), and how this information is to be used in any data synthesis.                                                                                      | 7                  |
| Summary measures                   | 13 | State the principal summary measures (e.g., risk ratio, difference in means).                                                                                                                                                                                                                               | 8                  |
| Synthesis of results               | 14 | Describe the methods of handling data and combining results of studies, if done, including measures of consistency (e.g., $I^2$ ) for each meta-analysis.                                                                                                                                                   | 9                  |

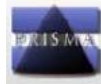

# PRISMA 2009 Checklist

| Section/Topic                 | #  | Checklist Item                                                                                                                                                                                           | Reported on Page # |
|-------------------------------|----|----------------------------------------------------------------------------------------------------------------------------------------------------------------------------------------------------------|--------------------|
| Risk of bias across studies   | 15 | Specify any assessment of risk of bias that may affect the cumulative evidence (e.g., publication bias, selective reporting within studies).                                                             | 10                 |
| Additional analyses           | 16 | Describe methods of additional analyses (e.g., sensitivity or subgroup analyses, meta-regression), if done, indicating which were pre-specified.                                                         | 8                  |
| <b>RESULTS</b>                |    |                                                                                                                                                                                                          |                    |
| Study selection               | 17 | Give numbers of studies screened, assessed for eligibility, and included in the review, with reasons for exclusions at each stage, ideally with a flow diagram.                                          | 10                 |
| Study characteristics         | 18 | For each study, present characteristics for which data were extracted (e.g., study size, PICOS, follow-up period) and provide the citations.                                                             | 10                 |
| Risk of bias within studies   | 19 | Present data on risk of bias of each study and, if available, any outcome level assessment (see item 12).                                                                                                | 34                 |
| Results of individual studies | 20 | For all outcomes considered (benefits or harms), present, for each study: (a) simple summary data for each intervention group (b) effect estimates and confidence intervals, ideally with a forest plot. | 33                 |
| Synthesis of results          | 21 | Present the main results of the review. If meta-analyses done, include for each, confidence intervals and measures of consistency.                                                                       | 28                 |
| Risk of bias across studies   | 22 | Present results of any assessment of risk of bias across studies (see Item 15).                                                                                                                          | 38                 |
| Additional analysis           | 23 | Give results of additional analyses, if done (e.g., sensitivity or subgroup analyses, meta-regression [see Item 16]).                                                                                    | 34                 |
| <b>DISCUSSION</b>             |    |                                                                                                                                                                                                          |                    |
| Summary of evidence           | 24 | Summarize the main findings including the strength of evidence for each main outcome; consider their relevance to key groups (e.g., healthcare providers, users, and policy makers).                     | 38                 |
| Limitations                   | 25 | Discuss limitations at study and outcome level (e.g., risk of bias), and at review-level (e.g., incomplete retrieval of identified research, reporting bias).                                            | 41                 |
| Conclusions                   | 26 | Provide a general interpretation of the results in the context of other evidence, and implications for future research.                                                                                  | 41                 |
| <b>FUNDING</b>                |    |                                                                                                                                                                                                          |                    |
| Funding                       | 27 | Describe sources of funding for the systematic review and other support (e.g., supply of data); role of funders for the systematic review.                                                               | 42                 |

From: Moher D, Liberati A, Tetzlaff J, Altman DG, The PRISMA Group (2009). Preferred Reporting Items for Systematic Reviews and Meta-Analyses: The PRISMA Statement. PLoS Med 6(6): e1000097. doi:10.1371/journal.pmed1000097

For more information, visit: [www.prisma-statement.org](http://www.prisma-statement.org).
