# Supplementary material for: Risk of invasive candidiasis with prolonged duration of ICU stay: a systematic review and meta-analysis
Source: PubMed Central journal article supplement — BMJ Open. 2020 Jul 12;10(7):e036452. doi: 10.1136/bmjopen-2019-036452 (PMC7359383; doi:10.1136/bmjopen-2019-036452), 2020-07-12
Supplement: bmjopen-2019-036452supp001.pdf [file bmjopen-2019-036452supp001.pdf]

Supplementary Table S1. Literature search through several databases and the results.

| Database            | Key words and the combination                                                 | Articles found through initial search (N) | Articles excluded based on selection criteria or were duplicates (N) | Articles qualified for full text review (N) | Articles selected for meta-analysis (ref. no.)          |
|---------------------|-------------------------------------------------------------------------------|-------------------------------------------|----------------------------------------------------------------------|---------------------------------------------|---------------------------------------------------------|
| PubMed*             | (candidiasis OR candidemia) AND (intensive care unit OR ICU) AND risk factors | 581                                       | 522                                                                  | 59                                          | #14, 15, 26-29, 30-35, 37-45, 47, 48, 51, 53-58, 60, 63 |
| Cochrane            | (candidiasis OR candidemia) AND (intensive care unit OR ICU) AND risk factors | 42                                        | 42                                                                   | 0                                           | -                                                       |
| Embase **           | (candidiasis OR candidemia) AND (intensive care unit OR ICU) AND risk factors | 566                                       | 560                                                                  | 6                                           | #36, 52, 59, 61                                         |
| Web of Science***   | (candidiasis OR candidemia) AND (intensive care unit OR ICU) AND risk factors | 677                                       | 676                                                                  | 1                                           | -                                                       |
| Manual search       |                                                                               | 9                                         | 0                                                                    | 9                                           | #16, 46, 49, 50, 62                                     |
| <b>Total number</b> |                                                                               | <b>1875</b>                               | <b>1800</b>                                                          | <b>75</b>                                   | <b>41</b>                                               |

\* PubMed search filters: Abstract available, English, Chinese, Human

\*\* Embase search filters: Abstract, English, Human

\*\*\* Web of Science search filters: Articles, English, Human
