# Supplementary material for: Risk of invasive candidiasis with prolonged duration of ICU stay: a systematic review and meta-analysis
Source: PubMed Central journal article supplement — BMJ Open. 2020 Jul 12;10(7):e036452. doi: 10.1136/bmjopen-2019-036452 (PMC7359383; doi:10.1136/bmjopen-2019-036452), 2020-07-12
Supplement: bmjopen-2019-036452supp002.pdf [file bmjopen-2019-036452supp002.pdf]

Supplementary Table S2. A supplementary information of heterogeneity test for overall studies or given subgroup for Table 3.

| Comparison                             | Length of hospital stay, days |         |                |         | Total length of ICU stay, days |        |                |         | Duration of ICU admission prior to candidemia onset, days |        |                |         | Length of hospital stay prior to ICU admission, days |       |                |         | Overall mortality rate |         |                |         |
|----------------------------------------|-------------------------------|---------|----------------|---------|--------------------------------|--------|----------------|---------|-----------------------------------------------------------|--------|----------------|---------|------------------------------------------------------|-------|----------------|---------|------------------------|---------|----------------|---------|
|                                        | Degrees                       |         |                |         | Degrees                        |        |                |         | Degrees                                                   |        |                |         | Degrees                                              |       |                |         | Degrees                |         |                |         |
|                                        | of freedom                    | Q       | I <sup>2</sup> | P-value | of freedom                     | Q      | I <sup>2</sup> | P-value | of freedom                                                | Q      | I <sup>2</sup> | P-value | of freedom                                           | Q     | I <sup>2</sup> | P-value | of freedom             | Q       | I <sup>2</sup> | P-value |
| <b>Overall</b>                         | 16                            | 20197.0 | 99.92          | <0.001  | 27                             | 2690.9 | 99.00          | <0.001  | 30                                                        | 4686.2 | 99.36          | <0.001  | 4                                                    | 311.2 | 98.71          | <0.001  | 39                     | 26981.1 | 99.86          | <0.001  |
| <b>Overall optional<sup>abcd</sup></b> | <sup>a</sup> 13               | 850.7   | 98.47          | <0.001  | <sup>b</sup> 25                | 2626.7 | 99.05          | <0.001  | <sup>c</sup> 26                                           | 2649.8 | 99.02          | <0.001  |                                                      |       |                |         | <sup>d</sup> 35        | 24273.9 | 99.86          | <0.001  |
| <b>Subgroups</b>                       |                               |         |                |         |                                |        |                |         |                                                           |        |                |         |                                                      |       |                |         |                        |         |                |         |
| <b>Type of study</b>                   |                               |         |                |         |                                |        |                |         |                                                           |        |                |         |                                                      |       |                |         |                        |         |                |         |
| Prospective                            | 7                             | 568.3   | 98.77          | <0.001  | 12                             | 662.2  | 98.19          | <0.001  | 16                                                        | 1572.3 | 98.98          | <0.001  | 1                                                    | 0.9   | 0.35           | <0.001  | 20                     | 13805.2 | 99.86          | <0.001  |
| Retrospective                          | 8                             | 14000.4 | 99.94          | <0.001  | 14                             | 893.2  | 98.43          | <0.001  | 13                                                        | 2670.7 | 99.51          | <0.001  | 2                                                    | 28.39 | 92.95          | <0.001  | 18                     | 9479.2  | 99.81          | <0.001  |
| <b>Presence of neutropenia</b>         |                               |         |                |         |                                |        |                |         |                                                           |        |                |         |                                                      |       |                |         |                        |         |                |         |
| Neutropenia                            | 7                             | 6119.9  | 99.89          | <0.001  | 8                              | 2297.7 | 99.65          | <0.001  | 11                                                        | 3099.9 | 99.65          | <0.001  | 0                                                    | -     | -              | -       | 11                     | 15935.0 | 99.93          | <0.001  |
| Non-neutropenia                        | 1                             | 1.8     | 42.97          | 0.185   | 0                              |        |                | -       | 1                                                         | 0      | 0              | 1       | 0                                                    | -     | -              | -       | 2                      | 1388.4  | 99.86          | <0.001  |
| <b>Type of ICU</b>                     |                               |         |                |         |                                |        |                |         |                                                           |        |                |         |                                                      |       |                |         |                        |         |                |         |
| ICU                                    | 7                             | 11712.8 | 99.94          | <0.001  | 16                             | 930.6  | 98.28          | <0.001  | 13                                                        | 1589.8 | 99.18          | <0.001  | 1                                                    | 4.14  | 75.86          | 0.042   | 23                     | 13807.9 | 99.83          | <0.001  |
| SICU                                   |                               |         |                | -       | 1                              | 0.7    | 0.00           | 0.404   | 2                                                         | 31.2   | 93.60          | <0.001  | 0                                                    | -     | -              | -       | 2                      | 1005.5  | 99.80          | <0.001  |
| MICU                                   | 0                             |         |                | -       | 1                              | 6.2    | 83.92          | 0.013-  | 1                                                         | 0      | 0              | 1-      | 0                                                    | -     | -              | -       | 1                      | 14.3    | 92.99          | <0.001  |
| MICU+SICU                              | 7                             | 776.9   | 99.10          | <0.001  | 6                              | 713.7  | 99.16          | <0.001  | 11                                                        | 1539.5 | 99.29          | <0.001  | 0                                                    | -     | -              | -       | 10                     | 8098.2  | 99.88          | <0.001  |
| <b>C. Albicans</b>                     |                               |         |                |         |                                |        |                |         |                                                           |        |                |         |                                                      |       |                |         |                        |         |                |         |
| C. Albicans                            | 2                             | 114.7   | 98.26          | <0.001  | 2                              | 5.79   | 65.45          | 0.055   | 1                                                         | 0      | 0              | 1       |                                                      |       |                |         | 5                      | 1558.5  | 99.68          | <0.001  |

|                      |    |        |       |        |    |        |       |        |    |        |       |        |   |       |       |        |    |         |       |        |
|----------------------|----|--------|-------|--------|----|--------|-------|--------|----|--------|-------|--------|---|-------|-------|--------|----|---------|-------|--------|
| Non C. Albicans      | 1  | 2.262  | 55.78 | 0.133  | 1  | 5.4    | 81.37 | 0.021  | 0  | -      | -     | -      | - | -     | -     | -      | -  |         |       |        |
| <b>Presence of</b>   |    |        |       |        |    |        |       |        |    |        |       |        |   |       |       |        |    |         |       |        |
| <b>IC/candidemia</b> |    |        |       |        |    |        |       |        |    |        |       |        |   |       |       |        |    |         |       |        |
| Candidemia           | 13 | 651.6  | 98.01 | <0.001 | 23 | 2620.0 | 99.12 | <0.001 | 24 | 2517.8 | 99.05 | <0.001 | 3 | 302.3 | 99.01 | <0.001 | 32 | 18755.6 | 99.83 | <0.001 |
| IC                   | 2  | 2588.9 | 99.92 | <0.001 | 3  | 17.0   | 82.33 | 0.001  | 5  | 1169.4 | 99.57 | <0.001 | 0 | -     | -     | -      | 6  | 3922.9  | 99.85 | <0.001 |
| <b>Region</b>        |    |        |       |        |    |        |       |        |    |        |       |        |   |       |       |        |    |         |       |        |
| Asia                 | 8  | 5464.6 | 99.85 | <0.001 | 11 | 738.6  | 98.51 | <0.001 | 11 | 2189.9 | 99.50 | <0.001 | 1 | 1.4   | 26.82 | 0.242  | 16 | 8966.6  | 99.82 | <0.001 |
| Europe               | 3  | 226.5  | 98.68 | <0.001 | 8  | 346.7  | 97.69 | <0.001 | 10 | 907.3  | 98.90 | <0.001 | 2 | 37.9  | 94.72 | <0.001 | 13 | 7933.8  | 99.84 | <0.001 |
| South America        | 0  | -      | -     | -      | 0  | -      | -     | -      | 2  | 19.6   | 89.80 | <0.001 | - | -     | -     | -      | 4  | 1960.7  | 99.80 | <0.001 |

Note: Certain subgroups have only 1 study (degree of freedom = 0).

<sup>a</sup> Excluded Yang et al. (2017), Gong et al (2016), Liao et al. (2015), and Guo et al. (2013).

<sup>b</sup> Excluded Yang et al. (2017), Gong et al (2016), Liao et al. (2015), and Guo et al. (2013).

<sup>c</sup> Excluded Yang et al. (2017), Gong et al (2016), Liao et al. (2015), and Hu et al. (2014).

<sup>d</sup> Excluded Yang et al. (2017), Gong et al (2016), Liao et al. (2015), and Hu et al. (2014).

Dash indicates no available.
